# Supplementary material for: Enrichment and sequencing of phosphopeptides on indiumtin oxide coated glass slides
Source: Royal Society of Chemistry journal article supplement (doi:10.1039/c0mb00269k), 2011-04-27
Supplement: c0mb00269k.pdf [file c0mb00269k.pdf]

### Supplementary image 1.1: PKA phosphorylated NFAT *m/z* 1257.55

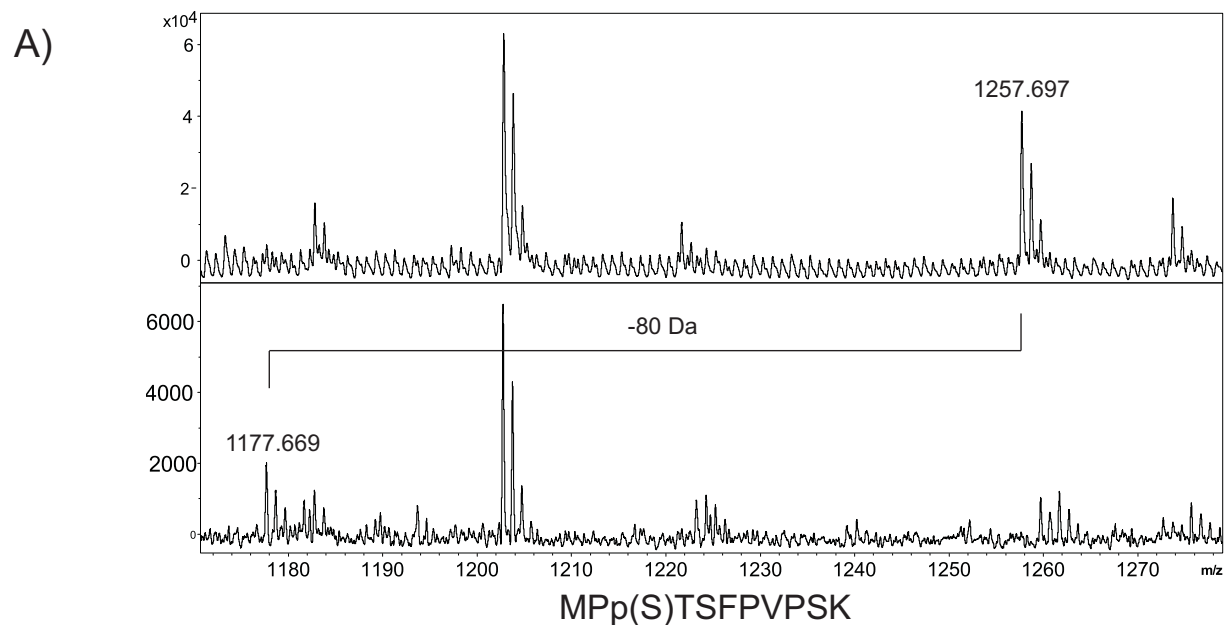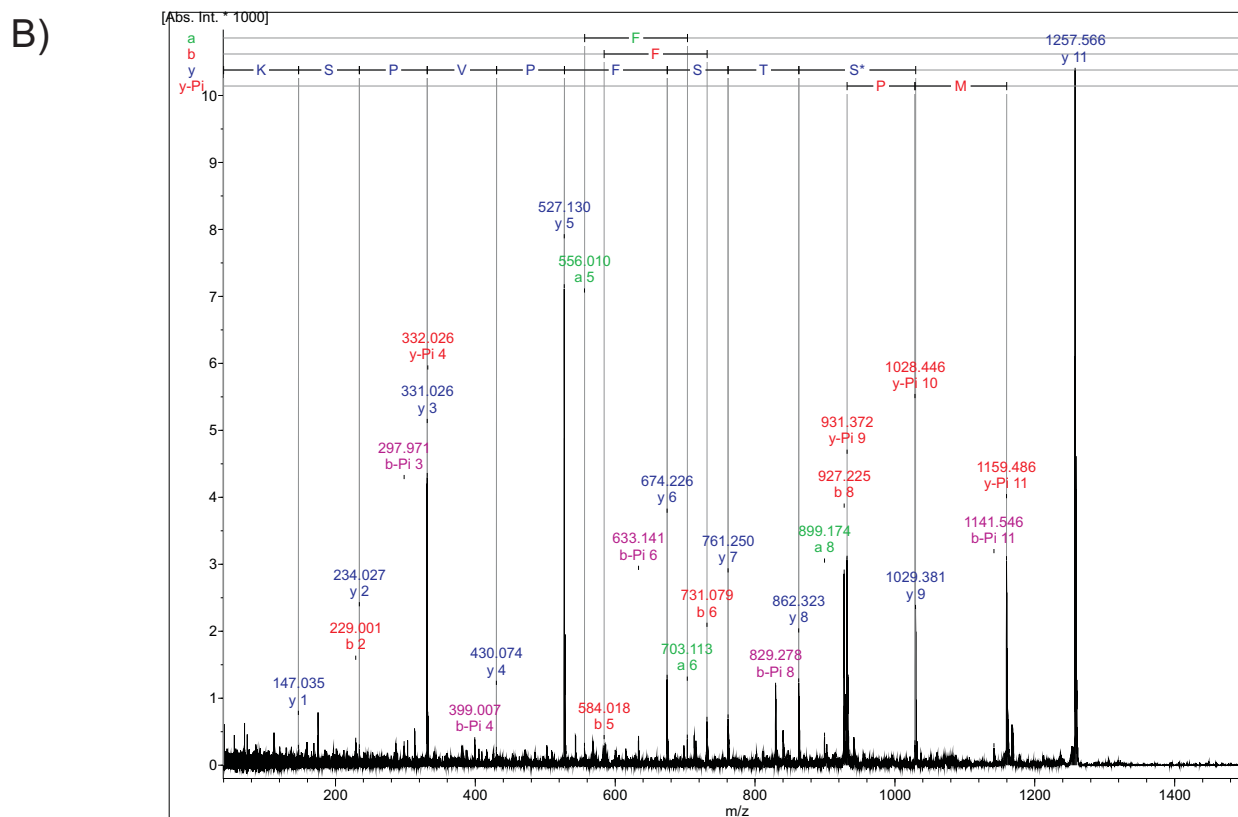

C)

Monoisotopic mass of neutral peptide Mr(calc): 1256.5512  
 Fixed modifications: Carbamidomethyl (C)  
 Variable modifications:  
 S3 : Phospho (ST), with neutral losses 97.9769(shown in table), 0.0000  
 Ions Score: 77 Expect: 2.2e-09  
 Matches (highlighted): 15/204 fragment ions using 21 most intense peaks

| #  | b               | b <sup>0</sup> | Seq. | y               | y <sup>*</sup> | y <sup>0</sup> | #  |
|----|-----------------|----------------|------|-----------------|----------------|----------------|----|
| 1  | 132.0478        |                | M    |                 |                |                | 11 |
| 2  | <b>229.1005</b> |                | P    | 1028.5411       | 1011.5146      | 1010.5306      | 10 |
| 3  | 298.122         | 280.1114       | S    | <b>931.4884</b> | 914.4618       | 913.4778       | 9  |
| 4  | <b>399.1697</b> | 381.1591       | T    | <b>862.4669</b> | 845.4403       | 844.4563       | 8  |
| 5  | 486.2017        | 468.1911       | S    | <b>761.4192</b> | 744.3927       | 743.4087       | 7  |
| 6  | 633.2701        | 615.2595       | F    | <b>674.3872</b> | 657.3606       | 656.3766       | 6  |
| 7  | 730.3229        | 712.3123       | P    | <b>527.3188</b> | 510.2922       | 509.3082       | 5  |
| 8  | <b>829.3913</b> | 811.3807       | V    | <b>430.266</b>  | 413.2395       | 412.2554       | 4  |
| 9  | 926.444         | 908.4335       | P    | <b>331.1976</b> | 314.171        | <b>313.187</b> | 3  |
| 10 | 1013.4761       | 995.4655       | S    | 234.1448        | 217.1183       | 216.1343       | 2  |
| 11 |                 |                | K    | <b>147.1128</b> | 130.0863       |                | 1  |

Part A: Mass shift of 80 *m/z* after the alkaline phosphatase treatment.

Part B: MS/MS spectrum and peak annotation from Biotools. Part C: Mascot search results and ion table.

### Supplementary image 1.2: PKA phosphorylated NFAT *m/z* 1273.54

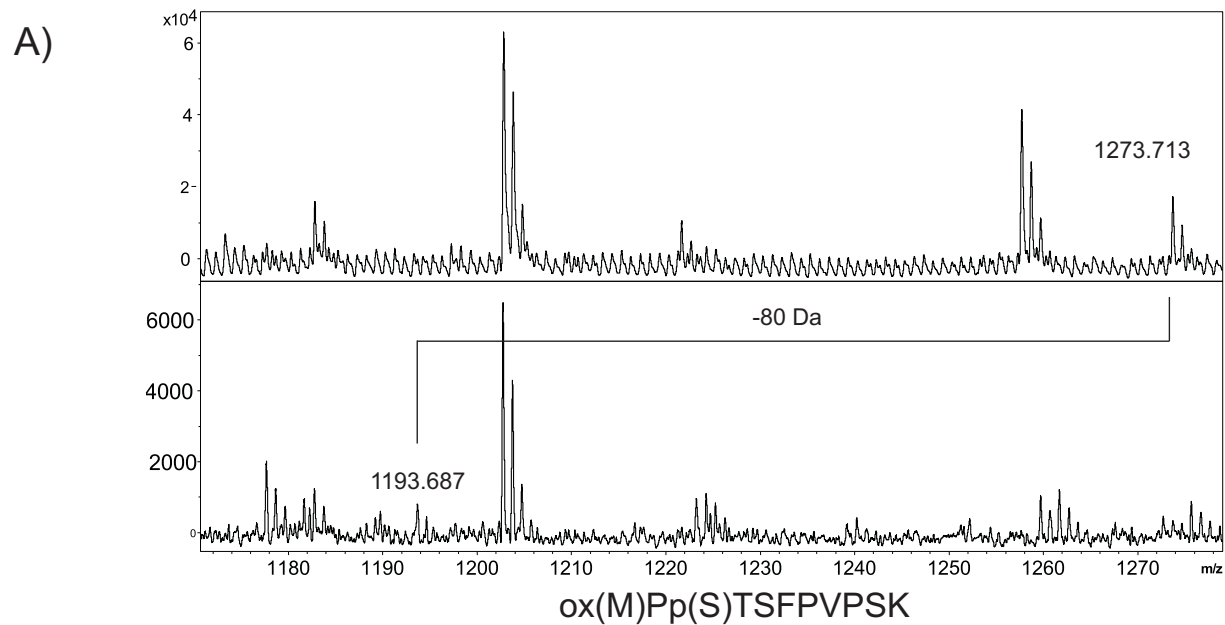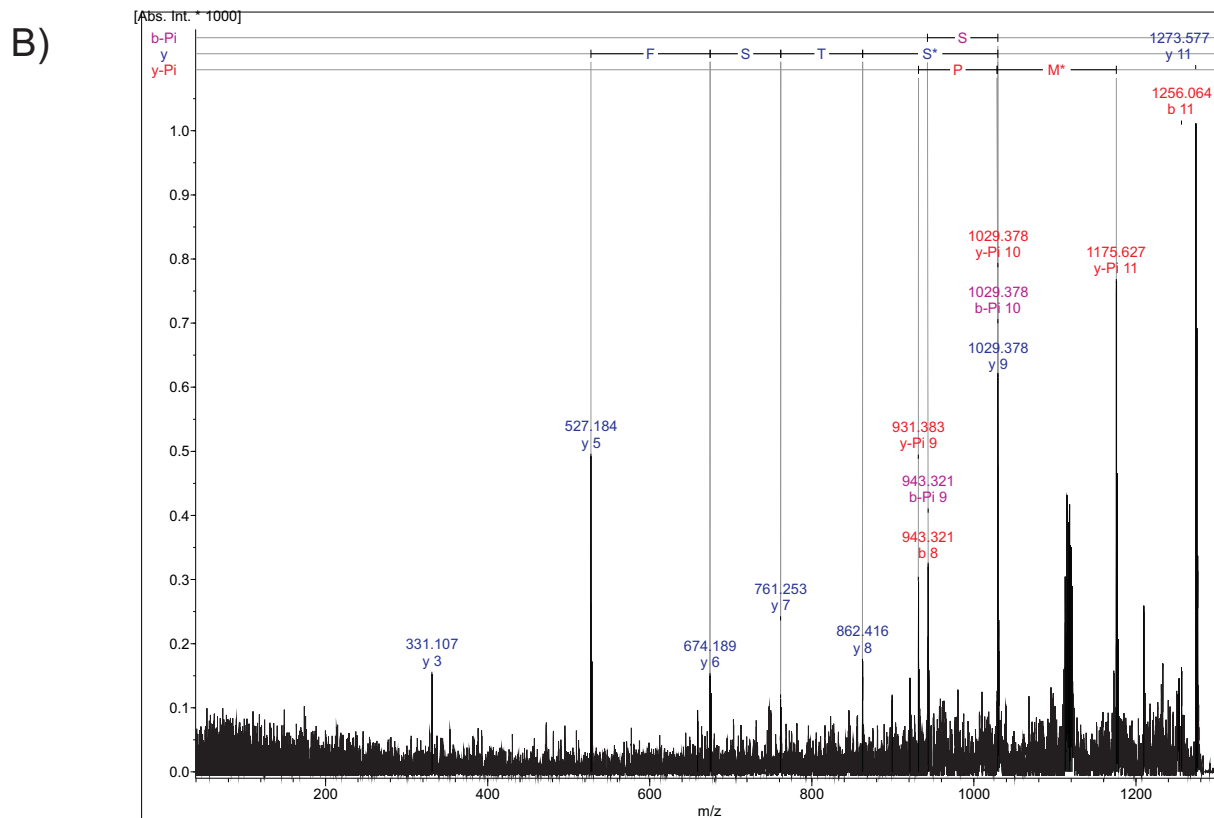

C)

Monoisotopic mass of neutral peptide *Mr*(calc): 1272.5461  
 Fixed modifications: Carbamidomethyl (C)  
 Variable modifications:  
 M1 : Oxidation (M), with neutral losses 63.9983(shown in table), 0.0000  
 S3 : Phospho (S), with neutral losses 0.0000(shown in table), 97.9769  
 Ions Score: 42. Expect: 6e-06  
 Matches (highlighted): 11/265 fragment ions using 16 most intense peaks

| #  | b         | b <sup>0</sup> | Seq. | y         | y <sup>*</sup> | y <sup>0</sup> | #  |
|----|-----------|----------------|------|-----------|----------------|----------------|----|
| 1  | 84.0444   |                | M    |           |                |                | 11 |
| 2  | 181.0972  |                | P    | 1126.518  | 1109.4915      | 1108.5074      | 10 |
| 3  | 348.0955  | 330.0849       | S    | 1029.4652 | 1012.4387      | 1011.4547      | 9  |
| 4  | 449.1432  | 431.1326       | T    | 862.4669  | 845.4403       | 844.4563       | 8  |
| 5  | 536.1752  | 518.1647       | S    | 761.4192  | 744.3927       | 743.4087       | 7  |
| 6  | 683.2436  | 665.2331       | F    | 674.3872  | 657.3606       | 656.3766       | 6  |
| 7  | 780.2964  | 762.2858       | P    | 527.3188  | 510.2922       | 509.3082       | 5  |
| 8  | 879.3648  | 861.3542       | V    | 430.266   | 413.2395       | 412.2554       | 4  |
| 9  | 976.4176  | 958.407        | P    | 331.1976  | 314.171        | 313.187        | 3  |
| 10 | 1063.4496 | 1045.439       | S    | 234.1448  | 217.1183       | 216.1343       | 2  |
| 11 |           |                | K    | 147.1128  | 130.0863       |                | 1  |

Part A: Mass shift of 80 *m/z* after the alkaline phosphatase treatment.

Part B: MS/MS spectrum and peak annotation from Biotools. Part C: Mascot search results and ion table.

### Supplementary image 1.3: PKA phosphorylated NFAT *m/z* 1385.61

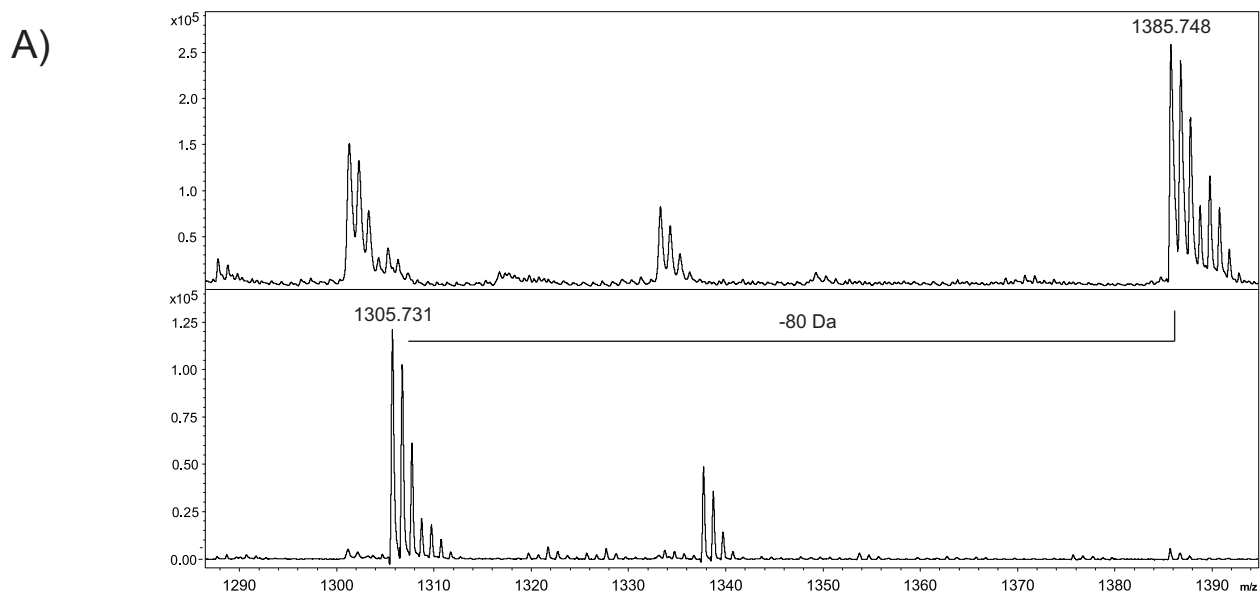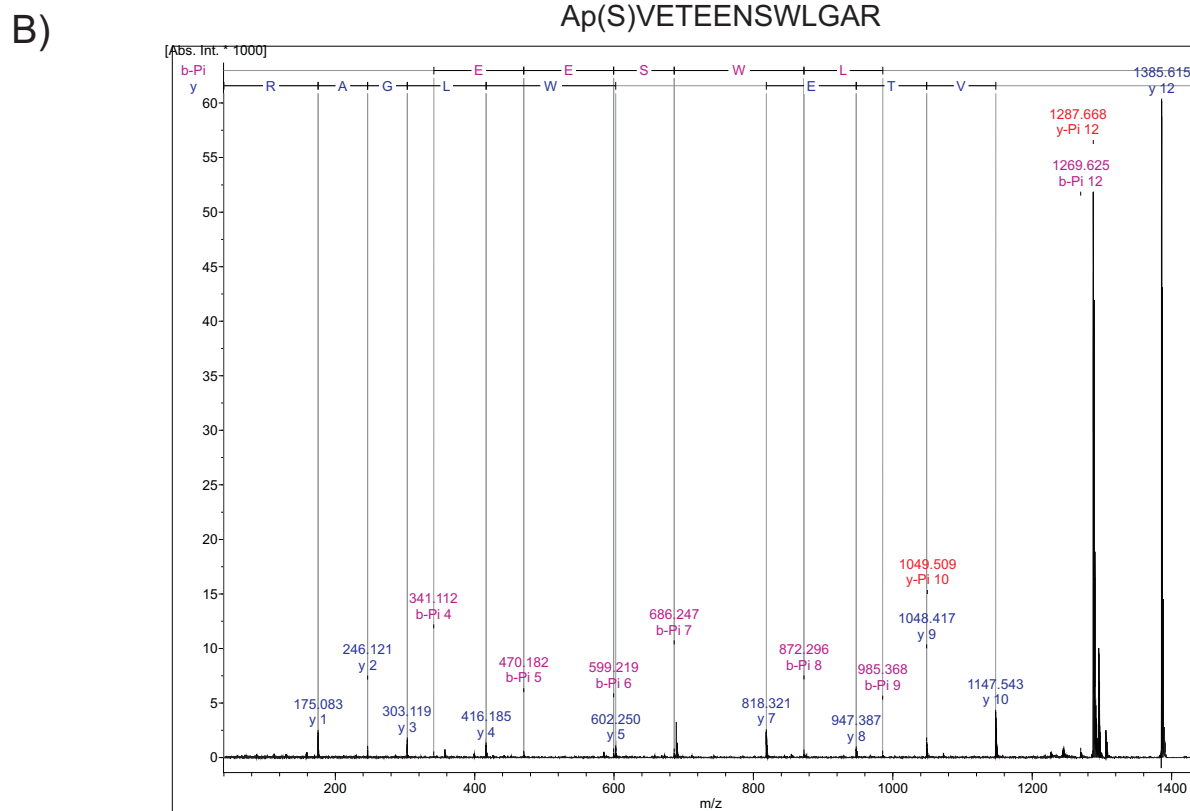

**C)**

Monoisotopic mass of neutral peptide  $M_r(\text{calc})$ : 1384.6024  
 Fixed modifications: Carbamidomethyl (C)  
 Variable modifications:  
 S2 : Phospho (ST), with neutral losses 97.9769 (shown in table), 0.0000  
 Ions Score: 106 Expect: 2.3e-12  
 Matches (highlighted): 13/220 fragment ions using 16 most intense peaks

| #  | b         | b <sup>0</sup> | Seq. | y         | y <sup>*</sup> | y <sup>0</sup> | #  |
|----|-----------|----------------|------|-----------|----------------|----------------|----|
| 1  | 72.0444   |                | A    |           |                |                | 12 |
| 2  | 141.0658  | 123.0553       | S    | 1216.5957 | 1199.5691      | 1198.5851      | 11 |
| 3  | 240.1343  | 222.1237       | V    | 1147.5742 | 1130.5477      | 1129.5636      | 10 |
| 4  | 341.1819  | 323.1714       | T    | 1048.5058 | 1031.4793      | 1030.4952      | 9  |
| 5  | 470.2245  | 452.214        | E    | 947.4581  | 930.4316       | 929.4476       | 8  |
| 6  | 599.2671  | 581.2566       | E    | 818.4155  | 801.389        | 800.405        | 7  |
| 7  | 686.2992  | 668.2886       | S    | 689.3729  | 672.3464       | 671.3624       | 6  |
| 8  | 872.3785  | 854.3679       | W    | 602.3409  | 585.3144       |                | 5  |
| 9  | 985.4625  | 967.452        | L    | 416.2616  | 399.235        |                | 4  |
| 10 | 1042.484  | 1024.4734      | G    | 303.1775  | 286.151        |                | 3  |
| 11 | 1113.5211 | 1095.5105      | A    | 246.1561  | 229.1295       |                | 2  |
| 12 |           |                | R    | 175.119   | 158.0924       |                | 1  |

Part A: Mass shift of 80 *m/z* after the alkaline phosphatase treatment.

Part B: MS/MS spectrum and peak annotation from Biotools. Part C: Mascot search results and ion table.

## Supplementary image 1.4: PKA phosphorylated NFAT $m/z$ 1417.59

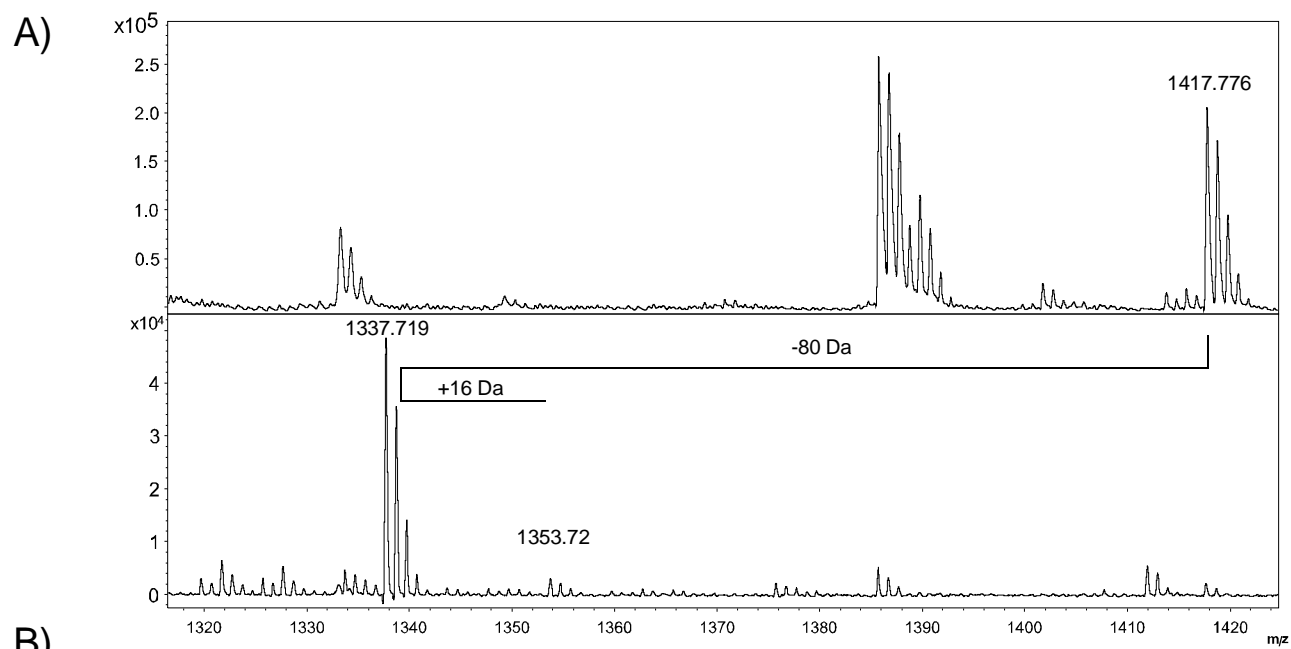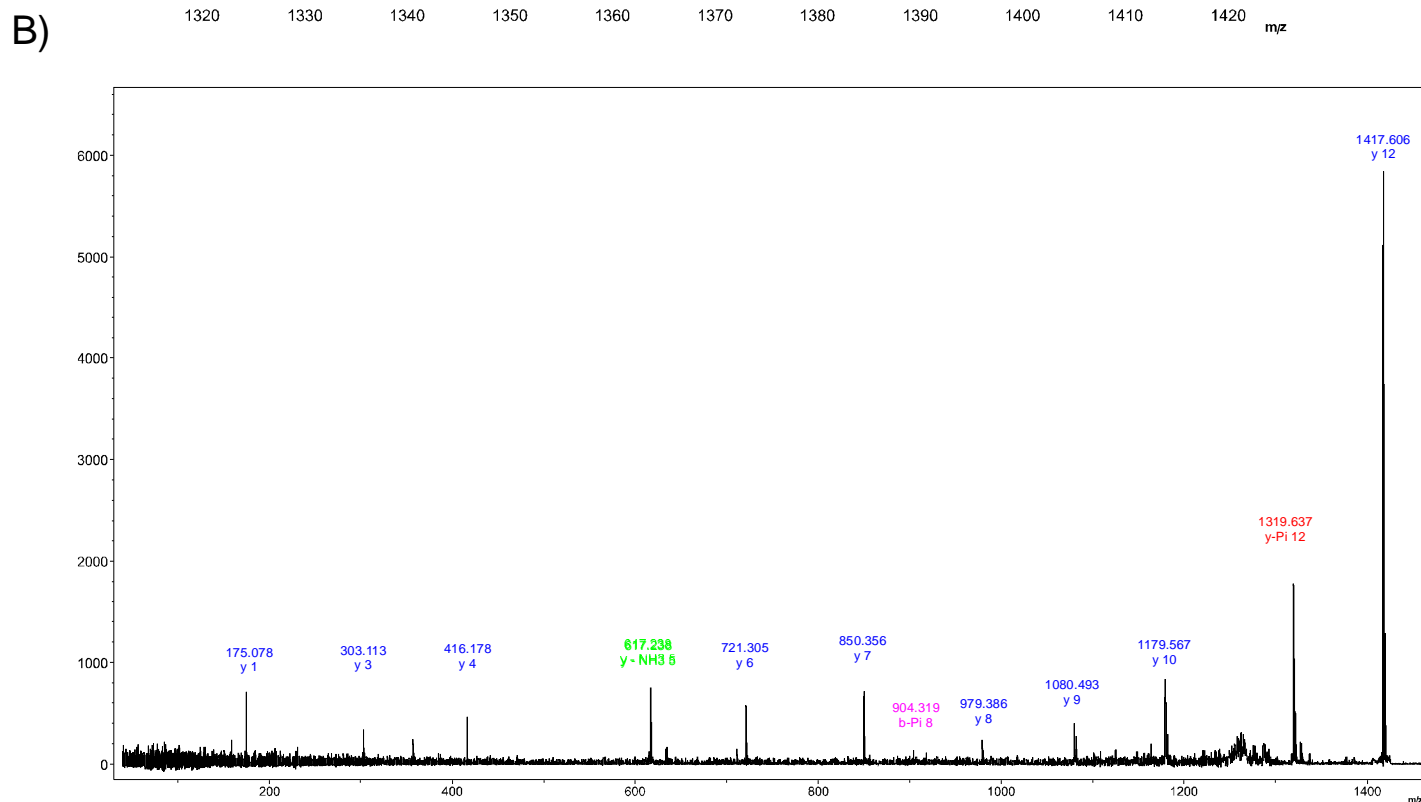

| #  | b        | Seq. | y        | y*       | #  |
|----|----------|------|----------|----------|----|
| 1  | 72.0444  | A    |          |          | 12 |
| 2  | 141.0658 | S    | 1248.586 | 1231.559 | 11 |
| 3  | 240.1343 | V    | 1179.564 | 1162.538 | 10 |
| 4  | 341.1819 | T    | 1080.496 | 1063.469 | 9  |
| 5  | 470.2245 | E    | 979.4479 | 962.4214 | 8  |
| 6  | 599.2671 | E    | 850.4054 | 833.3788 | 7  |
| 7  | 686.2992 | S    | 721.3628 | 704.3362 | 6  |
| 8  | 904.3683 | W    | 634.3307 | 617.3042 | 5  |
| 9  | 1017.452 | L    | 416.2616 | 399.235  | 4  |
| 10 | 1074.474 | G    | 303.1775 | 286.151  | 3  |
| 11 | 1145.511 | A    | 246.1561 | 229.1295 | 2  |
| 12 |          | R    | 175.119  | 158.0924 | 1  |

Monoisotopic mass of neutral peptide  $M_r(\text{calc})$ : 1416.5922

Fixed modifications: Carbamidomethyl (C)

Variable modifications:

S2 : Phospho (ST), with neutral losses 97.9769 (shown in table), 0.0000

W8 : Dioxidation (W)

Ions Score: 79 Expect: 1.2e-06

Matches (Highlighted): 12/219 fragment ions using 18 most intense peaks

Part A: mass shift of 80  $m/z$  after the alkaline phosphatase treatment.

Part B: MS/MS spectrum and peak annotation. Mascot search results and ion table.

### Supplementary image 1.5:PKA phosphorylated NFAT *m/z* 1491.54

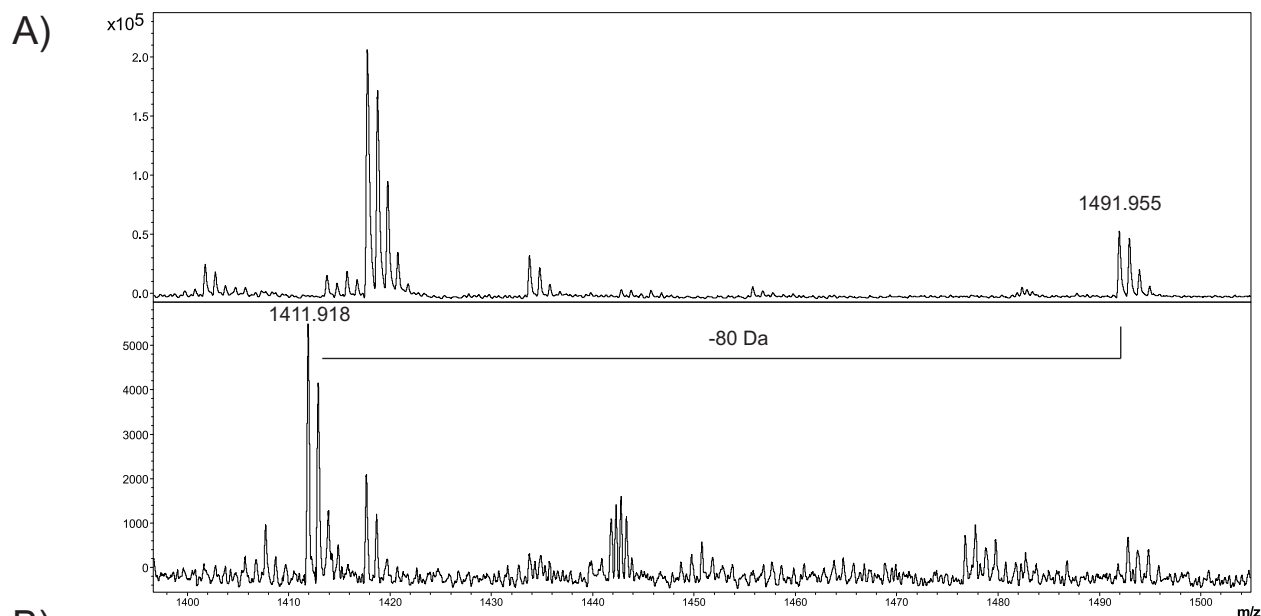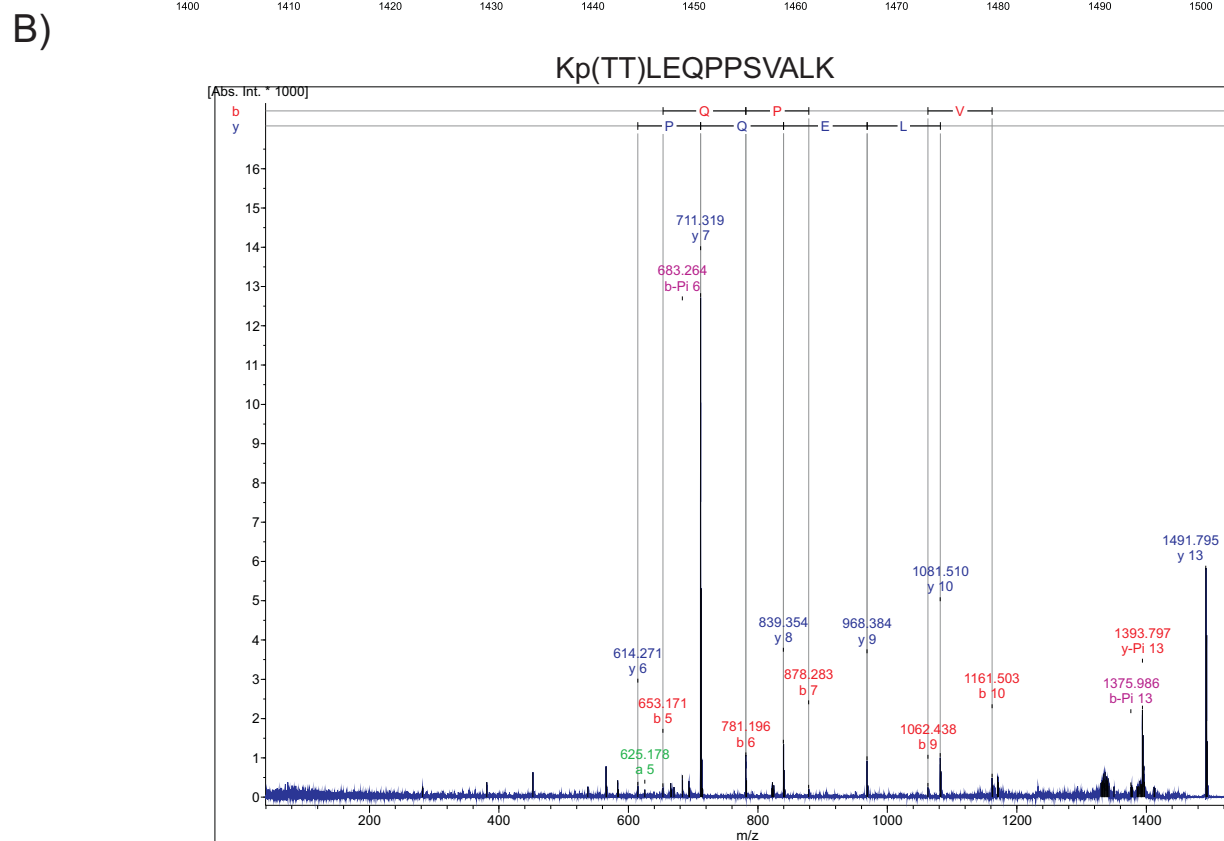

C)

Monoisotopic mass of neutral peptide *M<sub>r</sub>*(calc): 1490.7745  
 Fixed modifications: Carbamidomethyl (C)  
 Variable modifications:  
 T3 : Phospho (ST), with neutral losses 97.9769(shown in table), 0.0000  
 Ions Score: 24 Expect: 0.00035  
 Matches (highlighted): 11/285 fragment ions using 13 most intense peaks

| #  | b         | b*        | b <sup>o</sup> | Seq. | y         | y*        | y <sup>o</sup> | #  |
|----|-----------|-----------|----------------|------|-----------|-----------|----------------|----|
| 1  | 129.1022  | 112.0757  |                | K    |           |           |                | 13 |
| 2  | 230.1499  | 213.1234  | 212.1394       | T    | 1265.71   | 1248.6834 | 1247.6994      | 12 |
| 3  | 313.187   | 296.1605  | 295.1765       | T    | 1164.6623 | 1147.6357 | 1146.6517      | 11 |
| 4  | 426.2711  | 409.2445  | 408.2605       | L    | 1081.6252 | 1064.5986 | 1063.6146      | 10 |
| 5  | 555.3137  | 538.2871  | 537.3031       | E    | 968.5411  | 951.5146  | 950.5306       | 9  |
| 6  | 683.3723  | 666.3457  | 665.3617       | Q    | 839.4985  | 822.472   | 821.488        | 8  |
| 7  | 780.425   | 763.3985  | 762.4145       | P    | 711.44    | 694.4134  | 693.4294       | 7  |
| 8  | 877.4778  | 860.4512  | 859.4672       | P    | 614.3872  | 597.3606  | 596.3766       | 6  |
| 9  | 964.5098  | 947.4833  | 946.4993       | S    | 517.3344  | 500.3079  | 499.3239       | 5  |
| 10 | 1063.5782 | 1046.5517 | 1045.5677      | V    | 430.3024  | 413.2758  |                | 4  |
| 11 | 1134.6153 | 1117.5888 | 1116.6048      | A    | 331.234   | 314.2074  |                | 3  |
| 12 | 1247.6994 | 1230.6729 | 1229.6888      | L    | 260.1969  | 243.1703  |                | 2  |
| 13 |           |           |                | R    | 147.1128  | 130.0863  |                | 1  |

Part A: Mass shift of 80 *m/z* after the alkaline phosphatase treatment.

Part B: MS/MS spectrum and peak annotation from Biotoools. Part C: Mascot search results and ion table.

### Supplementary image 1.6: PKA phosphorylated NFAT *m/z* 1772.82

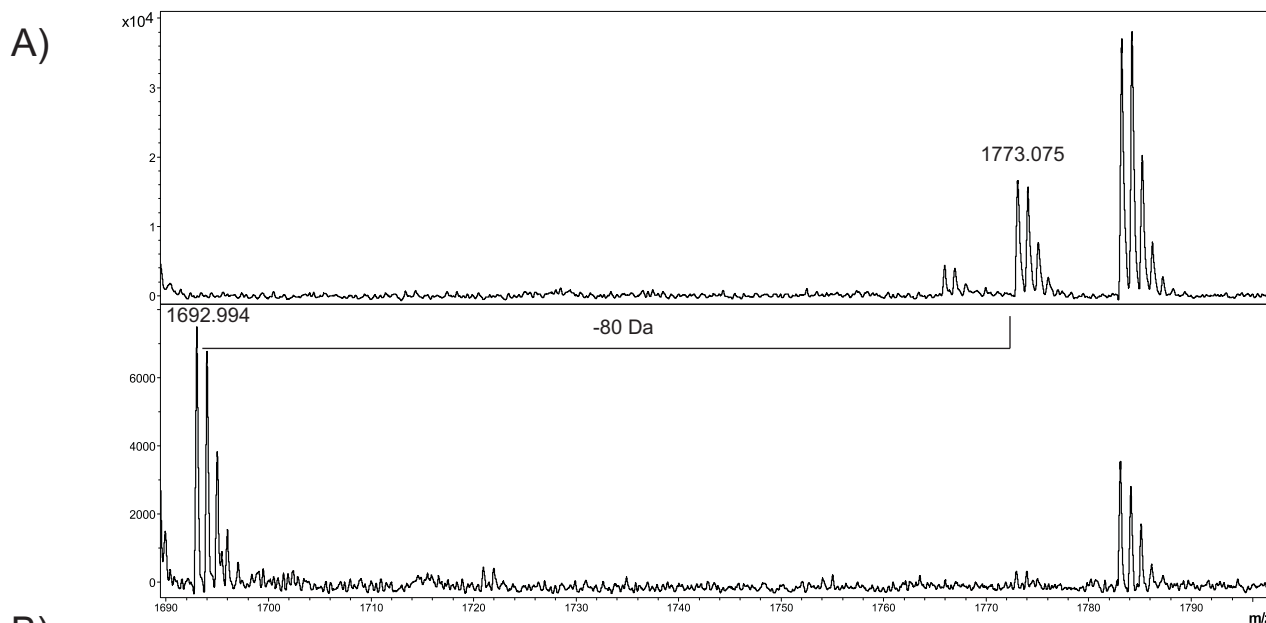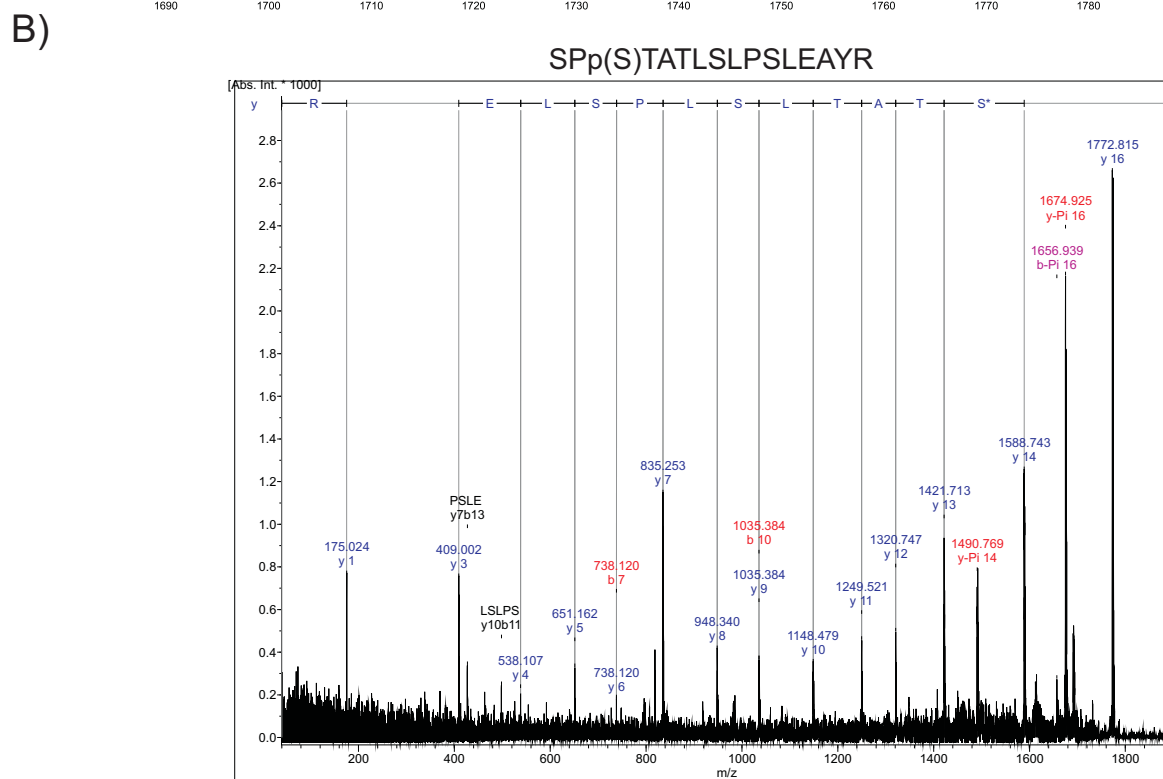

C)

Monoisotopic mass of neutral peptide *M<sub>r</sub>*(calc): 1771.8393  
 Fixed modifications: Carbamidomethyl (C)  
 Variable modifications:  
 S3 : Phospho (ST), with neutral losses 97.9769(shown in table), 0.0000  
 Ions Score: 109 Expect: 1.4e-12  
 Matches (highlighted): 25/353 fragment ions using 29 most intense peaks:

| #  | b         | b <sup>0</sup> | Seq. | y         | y <sup>*</sup> | y <sup>0</sup> | #  |
|----|-----------|----------------|------|-----------|----------------|----------------|----|
| 1  | 88.0393   | 70.0287        | S    |           |                |                | 16 |
| 2  | 185.0921  | 167.0815       | P    | 1587.8377 | 1570.8111      | 1569.8271      | 15 |
| 3  | 254.1135  | 236.103        | S    | 1490.7849 | 1473.7584      | 1472.7744      | 14 |
| 4  | 355.1612  | 337.1506       | T    | 1421.7635 | 1404.7369      | 1403.7529      | 13 |
| 5  | 426.1983  | 408.1878       | A    | 1320.7158 | 1303.6892      | 1302.7052      | 12 |
| 6  | 527.246   | 509.2354       | T    | 1249.6787 | 1232.6521      | 1231.6681      | 11 |
| 7  | 640.3301  | 622.3195       | L    | 1148.631  | 1131.6045      | 1130.6204      | 10 |
| 8  | 727.3621  | 709.3515       | S    | 1035.5469 | 1018.5204      | 1017.5364      | 9  |
| 9  | 840.4462  | 822.4356       | L    | 948.5149  | 931.4884       | 930.5043       | 8  |
| 10 | 937.4989  | 919.4884       | P    | 835.4308  | 818.4043       | 817.4203       | 7  |
| 11 | 1024.5309 | 1006.5204      | S    | 738.3781  | 721.3515       | 720.3675       | 6  |
| 12 | 1137.615  | 1119.6044      | L    | 651.3461  | 634.3195       | 633.3355       | 5  |
| 13 | 1266.6576 | 1248.647       | E    | 538.262   | 521.2354       | 520.2514       | 4  |
| 14 | 1337.6947 | 1319.6841      | A    | 409.2194  | 392.1928       |                | 3  |
| 15 | 1500.758  | 1482.7475      | Y    | 338.1823  | 321.1557       |                | 2  |
| 16 |           |                | R    | 175.119   | 158.0924       |                | 1  |

Part A: Mass shift of 80 *m/z* after the alkaline phosphatase treatment.

Part B: MS/MS spectrum and peak annotation from Biotoools. Part C: Mascot search results and ion table.

### Supplementary image 1.7: PKA phosphorylated NFAT *m/z* 1928.93

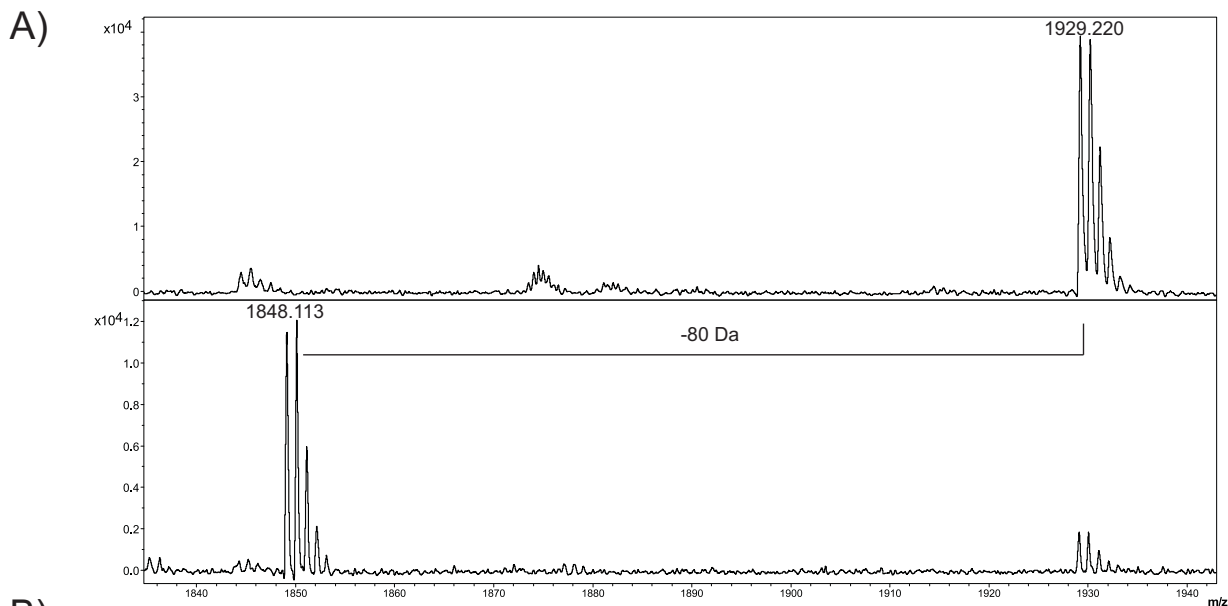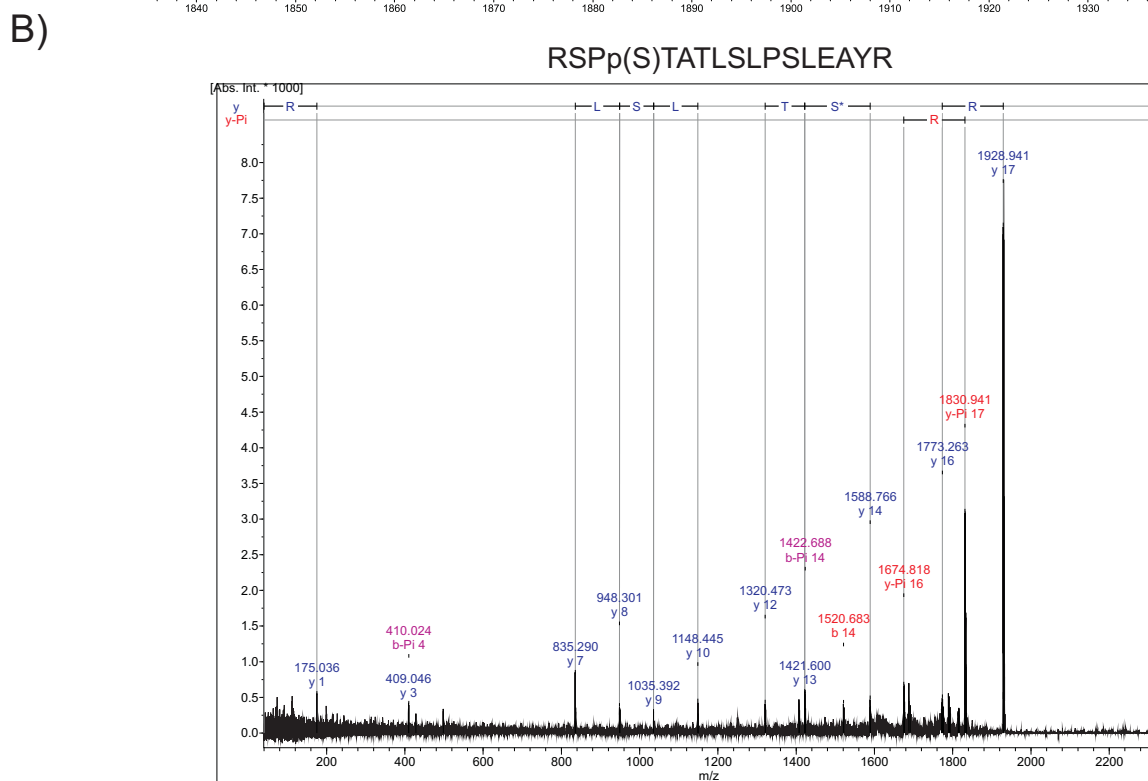

C)

Monoisotopic mass of neutral peptide Mr(calc): 1927.9404  
 Fixed modifications: Carbamidomethyl (C)  
 Variable modifications:  
 S4 : Phospho (ST), with neutral losses 97.9769(shown in table), 0.0000  
 Ions Score: 61 Expect: 7.9e-08  
 Matches (highlighted): 18/474 fragment ions using 24 most intense peaks

| #  | b         | b*        | b <sup>0</sup> | Seq. | y         | y*        | y <sup>0</sup> | #  |
|----|-----------|-----------|----------------|------|-----------|-----------|----------------|----|
| 1  | 157.1084  | 140.0818  |                | R    |           |           |                | 17 |
| 2  | 244.1404  | 227.1139  | 226.1298       | S    | 1674.8697 | 1657.8432 | 1656.8592      | 16 |
| 3  | 341.1932  | 324.1666  | 323.1826       | P    | 1587.8377 | 1570.8111 | 1569.8271      | 15 |
| 4  | 410.2146  | 393.1881  | 392.2041       | S    | 1490.7849 | 1473.7584 | 1472.7744      | 14 |
| 5  | 511.2623  | 494.2358  | 493.2517       | T    | 1421.7635 | 1404.7369 | 1403.7529      | 13 |
| 6  | 582.2994  | 565.2729  | 564.2889       | A    | 1320.7158 | 1303.6892 | 1302.7052      | 12 |
| 7  | 683.3471  | 666.3206  | 665.3365       | T    | 1249.6787 | 1232.6521 | 1231.6681      | 11 |
| 8  | 796.4312  | 779.4046  | 778.4206       | L    | 1148.631  | 1131.6045 | 1130.6204      | 10 |
| 9  | 883.4632  | 866.4366  | 865.4526       | S    | 1035.5469 | 1018.5204 | 1017.5364      | 9  |
| 10 | 996.5473  | 979.5207  | 978.5367       | L    | 948.5149  | 931.4884  | 930.5043       | 8  |
| 11 | 1093.6    | 1076.5735 | 1075.5895      | P    | 835.4308  | 818.4043  | 817.4203       | 7  |
| 12 | 1180.6321 | 1163.6055 | 1162.6215      | S    | 738.3781  | 721.3515  | 720.3675       | 6  |
| 13 | 1293.7161 | 1276.6896 | 1275.7056      | L    | 651.3461  | 634.3195  | 633.3355       | 5  |
| 14 | 1422.7587 | 1405.7322 | 1404.7481      | E    | 538.262   | 521.2354  | 520.2514       | 4  |
| 15 | 1493.7958 | 1476.7693 | 1475.7853      | A    | 409.2194  | 392.1928  |                | 3  |
| 16 | 1656.8592 | 1639.8326 | 1638.8486      | Y    | 338.1823  | 321.1557  |                | 2  |
| 17 |           |           |                | R    | 175.119   | 158.0924  |                | 1  |

Part A: Mass shift of 80 *m/z* after the alkaline phosphatase treatment.

Part B: MS/MS spectrum and peak annotation from Biotoools. Part C: Mascot search results and ion table.

### Supplementary image 1.8: PKA phosphorylated NFAT *m/z* 2441.19

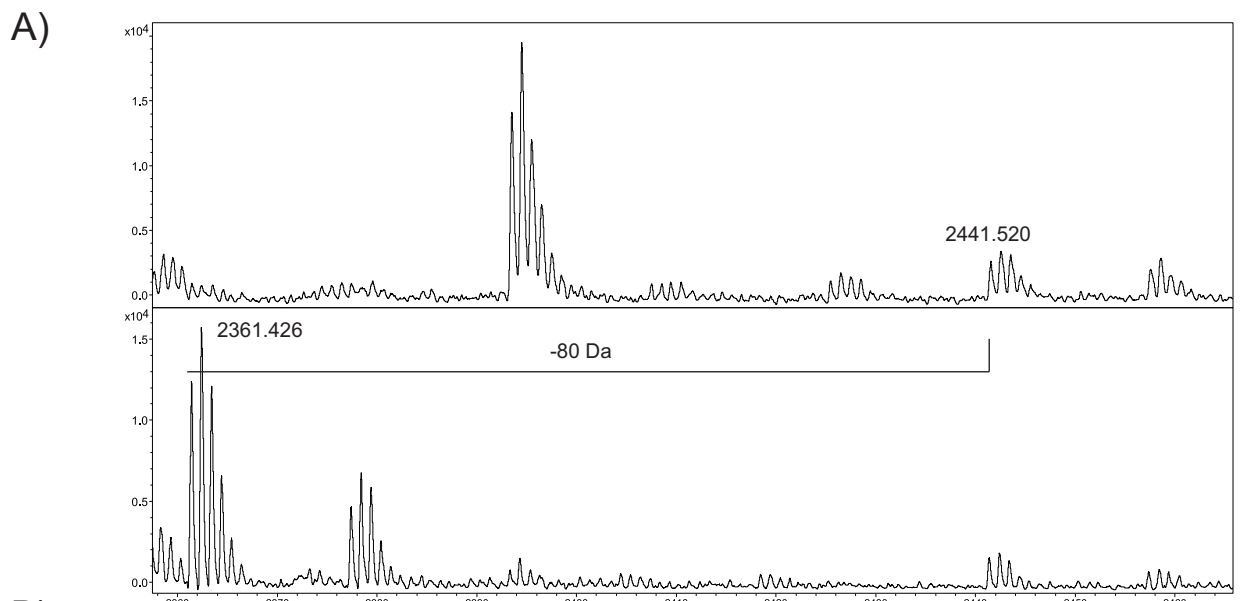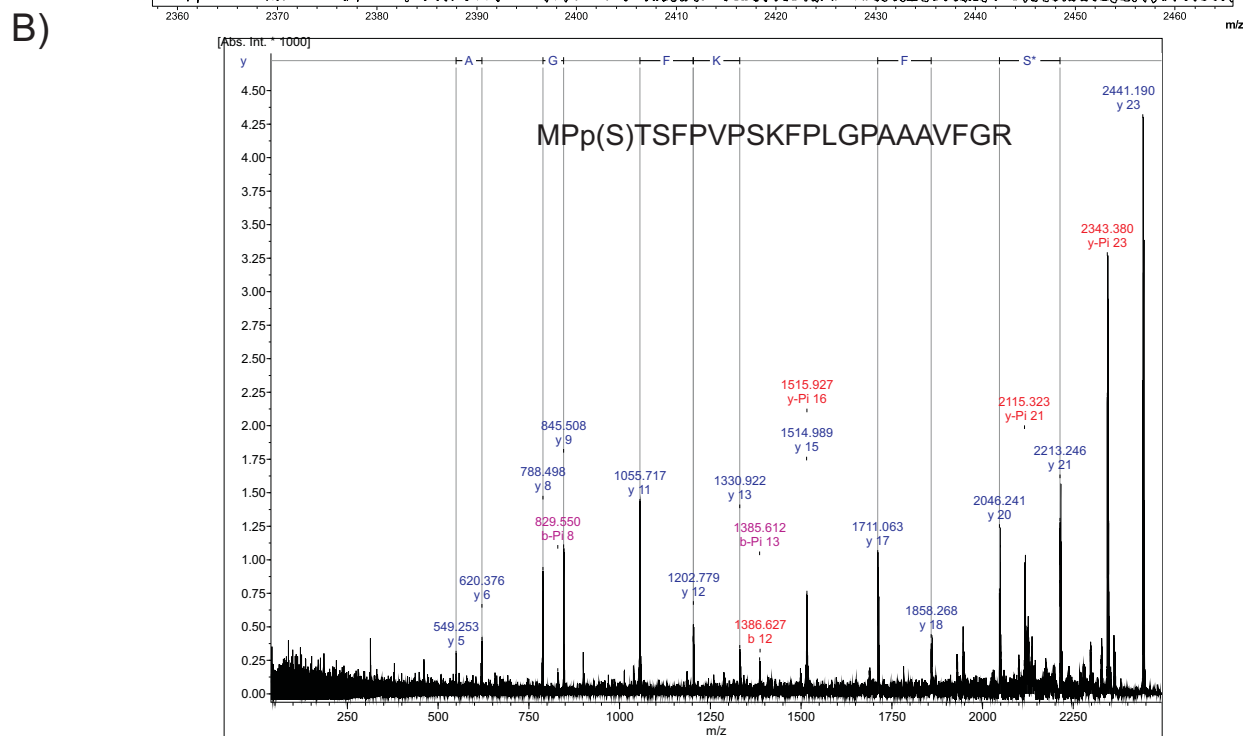

Monoisotopic mass of neutral peptide *Mr*(calc): 2440.2014  
 Fixed modifications: Carbamidomethyl (C)  
 Variable modifications:  
 S3 : Phospho (ST), with neutral losses 97.9769(shown in table), 0.0000  
 Ions Score: 53 Expect: 5e-07  
 Matches (highlighted): 29/560 fragment ions using 50 most intense peaks

| #  | b         | b*        | b <sup>0</sup> | Seq. | y         | y*        | y <sup>0</sup> | #  |
|----|-----------|-----------|----------------|------|-----------|-----------|----------------|----|
| 1  | 132.0478  |           |                | M    |           |           |                | 23 |
| 2  | 229.1005  |           |                | P    | 2212.1913 | 2195.1648 | 2194.1808      | 22 |
| 3  | 298.122   |           | 280.1114       | S    | 2115.1386 | 2098.112  | 2097.128       | 21 |
| 4  | 399.1697  |           | 381.1591       | T    | 2046.1171 | 2029.0906 | 2028.1065      | 20 |
| 5  | 486.2017  |           | 468.1911       | S    | 1945.0694 | 1928.0429 | 1927.0589      | 19 |
| 6  | 633.2701  |           | 615.2595       | F    | 1858.0374 | 1841.0109 | 1840.0268      | 18 |
| 7  | 730.3229  |           | 712.3123       | P    | 1710.969  | 1693.9424 | 1692.9584      | 17 |
| 8  | 829.3913  |           | 811.3807       | V    | 1613.9162 | 1596.8897 | 1595.9057      | 16 |
| 9  | 926.444   |           | 908.4335       | P    | 1514.8478 | 1497.8213 | 1496.8372      | 15 |
| 10 | 1013.4761 |           | 995.4655       | S    | 1417.795  | 1400.7685 | 1399.7845      | 14 |
| 11 | 1141.571  | 1124.5445 | 1123.5605      | K    | 1330.763  | 1313.7365 |                | 13 |
| 12 | 1288.6394 | 1271.6129 | 1270.6289      | F    | 1202.6681 | 1185.6415 |                | 12 |
| 13 | 1385.6922 | 1368.6657 | 1367.6816      | P    | 1055.5996 | 1038.5731 |                | 11 |
| 14 | 1498.7763 | 1481.7497 | 1480.7657      | L    | 958.5469  | 941.5203  |                | 10 |
| 15 | 1555.7977 | 1538.7712 | 1537.7872      | G    | 845.4628  | 828.4363  |                | 9  |
| 16 | 1652.8505 | 1635.824  | 1634.8399      | P    | 788.4413  | 771.4148  |                | 8  |
| 17 | 1723.8876 | 1706.8611 | 1705.8771      | A    | 691.3886  | 674.362   |                | 7  |
| 18 | 1794.9247 | 1777.8982 | 1776.9142      | A    | 620.3515  | 603.3249  |                | 6  |
| 19 | 1865.9618 | 1848.9353 | 1847.9513      | A    | 549.3144  | 532.2878  |                | 5  |
| 20 | 1965.0303 | 1948.0037 | 1947.0197      | V    | 478.2772  | 461.2507  |                | 4  |
| 21 | 2112.0987 | 2095.0721 | 2094.0881      | F    | 379.2088  | 362.1823  |                | 3  |
| 22 | 2169.1201 | 2152.0936 | 2151.1096      | G    | 232.1404  | 215.1139  |                | 2  |
| 23 |           |           |                | R    | 175.119   | 158.0924  |                | 1  |

Part A: Mass shift of 80 *m/z* after the alkaline phosphatase treatment.

Part B: MS/MS spectrum and peak annotation from Biotoools. Part C: Mascot search results and ion table.



### Supplementary image 1.9: PKA phosphorylated NFAT *m/z* 2457.22

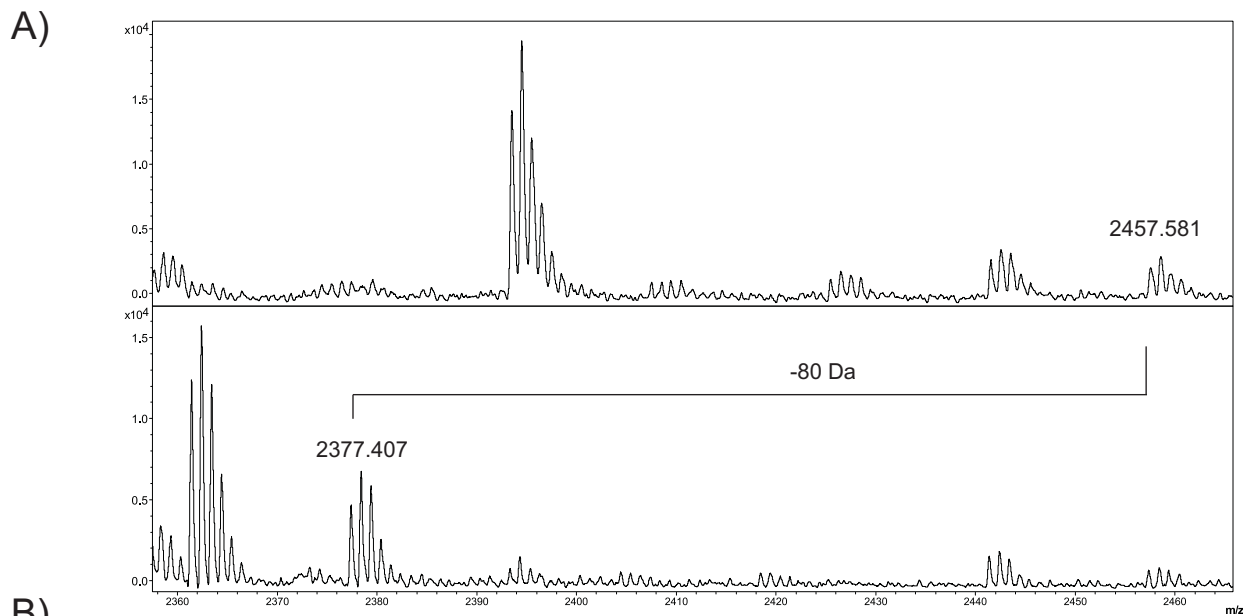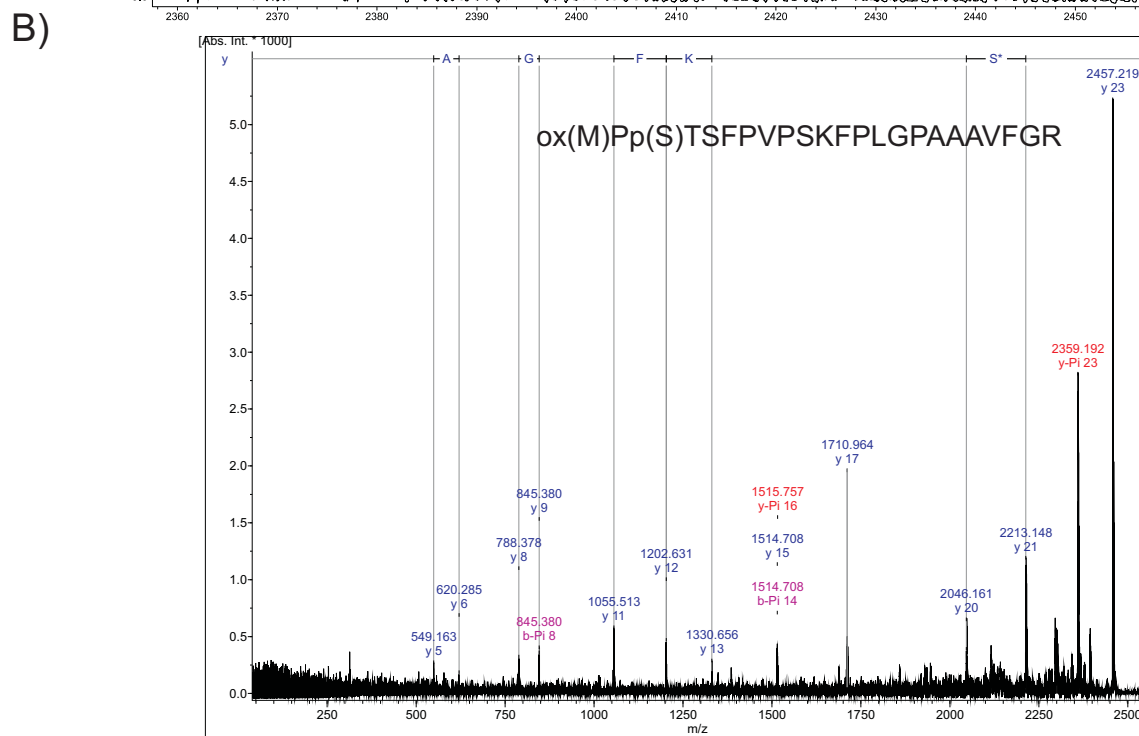

Monoisotopic mass of neutral peptide Mr(calc): 2456.1964  
 Fixed modifications: Carbamidomethyl (C)  
 Variable modifications:  
 M1 : Oxidation (M), with neutral losses 63.9983(shown in table), 0.0000  
 S3 : Phospho (ST), with neutral losses 0.0000(shown in table), 97.9769  
 Ions Score: 51 Expect: 7.7e-07  
 Matches (highlighted): 26/765 fragment ions using 37 most intense peaks

| #  | b         | b*        | b <sup>0</sup> | Seq. | y         | y*        | y <sup>0</sup> | #  |
|----|-----------|-----------|----------------|------|-----------|-----------|----------------|----|
| 1  | 84.0444   |           |                | M    |           |           |                | 23 |
| 2  | 181.0972  |           |                | P    | 2310.1682 | 2293.1417 | 2292.1577      | 22 |
| 3  | 348.0955  |           | 330.0849       | S    | 2213.1155 | 2196.0889 | 2195.1049      | 21 |
| 4  | 449.1432  |           | 431.1326       | T    | 2046.1171 | 2029.0906 | 2028.1065      | 20 |
| 5  | 536.1752  |           | 518.1647       | S    | 1945.0694 | 1928.0429 | 1927.0589      | 19 |
| 6  | 683.2436  |           | 665.2331       | F    | 1858.0374 | 1841.0109 | 1840.0268      | 18 |
| 7  | 780.2964  |           | 762.2858       | P    | 1710.969  | 1693.9424 | 1692.9584      | 17 |
| 8  | 879.3648  |           | 861.3542       | V    | 1613.9162 | 1596.8897 | 1595.9057      | 16 |
| 9  | 976.4176  |           | 958.407        | P    | 1514.8478 | 1497.8213 | 1496.8372      | 15 |
| 10 | 1063.4496 |           | 1045.439       | S    | 1417.795  | 1400.7685 | 1399.7845      | 14 |
| 11 | 1191.5446 | 1174.518  | 1173.534       | K    | 1330.763  | 1313.7365 |                | 13 |
| 12 | 1338.613  | 1321.5864 | 1320.6024      | F    | 1202.6681 | 1185.6415 |                | 12 |
| 13 | 1435.6657 | 1418.6392 | 1417.6552      | P    | 1055.5996 | 1038.5731 |                | 11 |
| 14 | 1548.7498 | 1531.7233 | 1530.7392      | L    | 958.5469  | 941.5203  |                | 10 |
| 15 | 1605.7713 | 1588.7447 | 1587.7607      | G    | 845.4628  | 828.4363  |                | 9  |
| 16 | 1702.824  | 1685.7975 | 1684.8135      | P    | 788.4413  | 771.4148  |                | 8  |
| 17 | 1773.8611 | 1756.8346 | 1755.8506      | A    | 691.3886  | 674.362   |                | 7  |
| 18 | 1844.8983 | 1827.8717 | 1826.8877      | A    | 620.3515  | 603.3249  |                | 6  |
| 19 | 1915.9354 | 1898.9088 | 1897.9248      | A    | 549.3144  | 532.2878  |                | 5  |
| 20 | 2015.0038 | 1997.9772 | 1996.9932      | V    | 478.2772  | 461.2507  |                | 4  |
| 21 | 2162.0722 | 2145.0457 | 2144.0616      | F    | 379.2088  | 362.1823  |                | 3  |
| 22 | 2219.0937 | 2202.0671 | 2201.0831      | G    | 232.1404  | 215.1139  |                | 2  |
| 23 |           |           |                | R    | 175.119   | 158.0924  |                | 1  |

C)

Part A: Mass shift of 80 *m/z* after the alkaline phosphatase treatment.

Part B: MS/MS spectrum and peak annotation from Biotoools. Part C: Mascot search results and ion table.

### Supplementary image 1.10: PKA phosphorylated NFAT *m/z* 3217.62

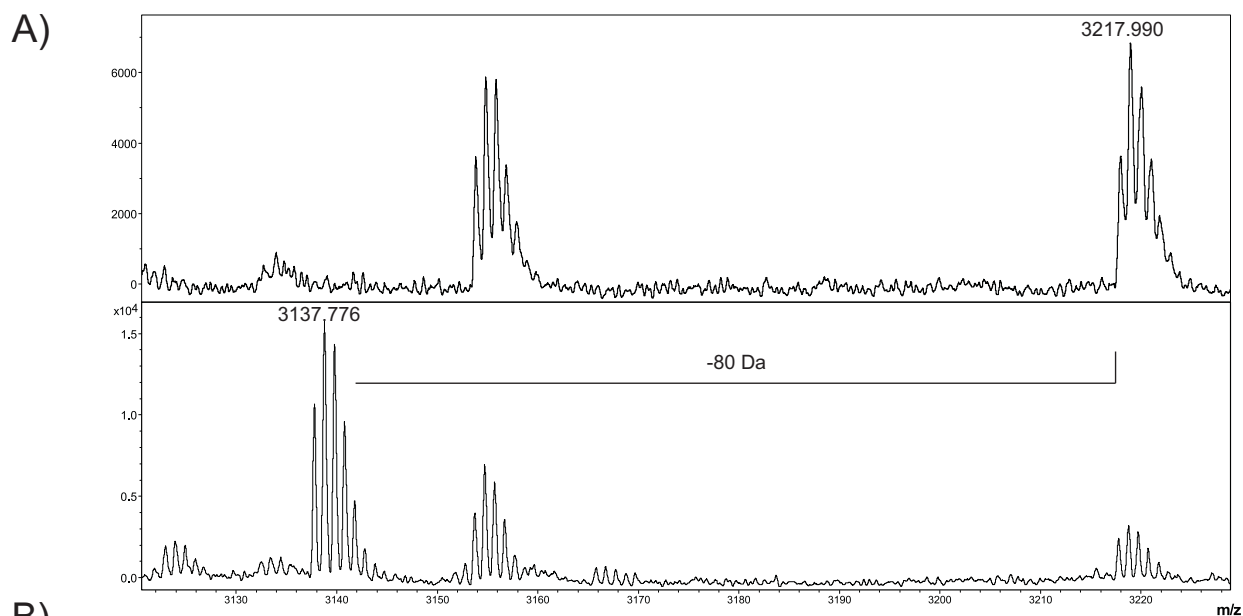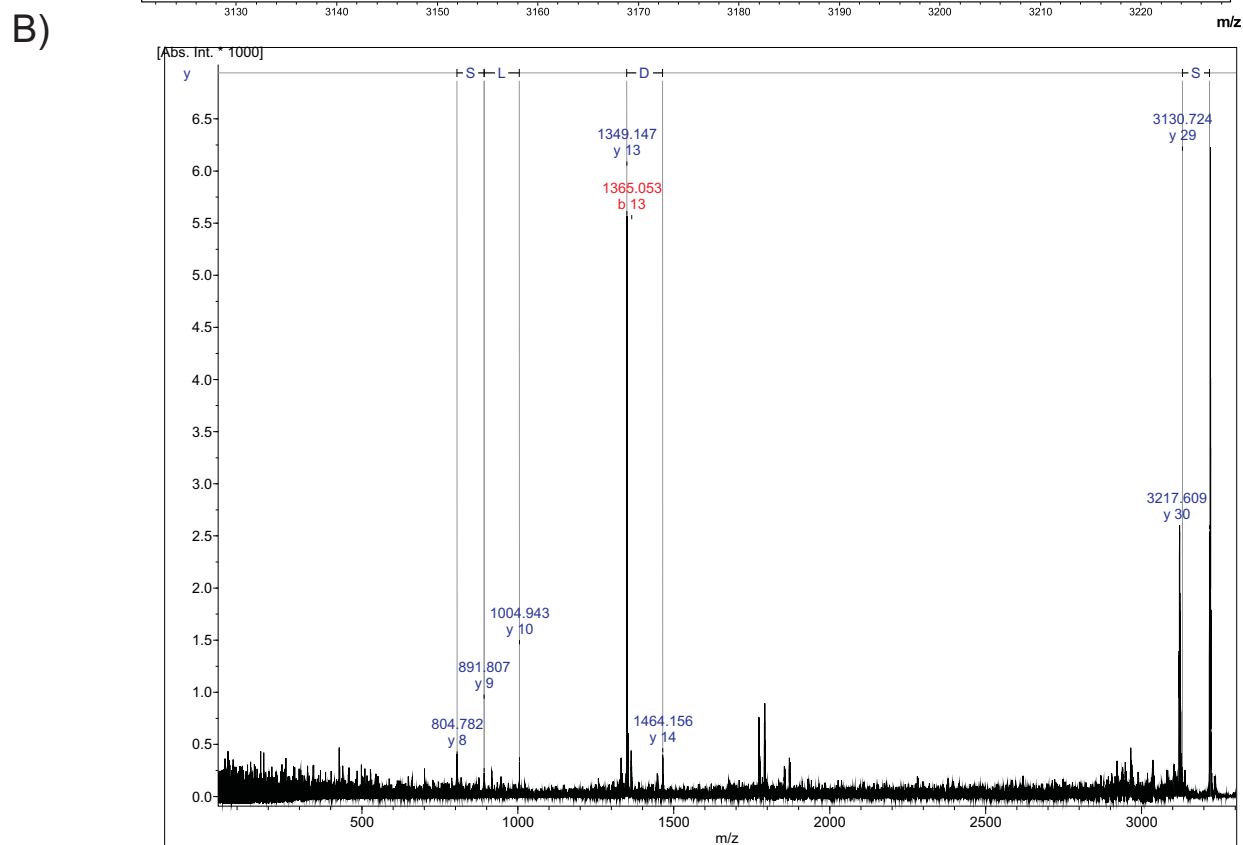

C)  
 Top scoring peptides matches to query 1  
 Score greater than 13 indicates identity

| Score | Expect | ppm  | Hit | Protein  | Peptide                          |
|-------|--------|------|-----|----------|----------------------------------|
| 15.9  | 0.026  | 33.7 | 1   | GST-NFAT | SPSTATLp(S)LPSLEAYRDPSCSPASSLSSR |
| 15.9  | 0.026  | 33.7 | 1   | GST-NFAT | SPSTAp(T)LSLPSLEAYRDPSCSPASSLSSR |
| 15.9  | 0.026  | 33.7 | 1   | GST-NFAT | SPSp(T)ATLSLPSLEAYRDPSCSPASSLSSR |
| 15.9  | 0.026  | 33.7 | 1   | GST-NFAT | SPp(S)TATLSLPSLEAYRDPSCSPASSLSSR |
| 13.2  | 0.048  | 33.7 | 1   | GST-NFAT | SPSTATLSLp(S)LEAYRDPSCSPASSLSSR  |
| 11    | 0.08   | 33.7 | 1   | GST-NFAT | p(S)PSTATLSLPSLEAYRDPSCSPASSLSSR |

Part A: Mass shift of 80 *m/z* after the alkaline phosphatase treatment.

Part B: MS/MS spectrum and peak annotation from Biotools. Part C: Mascot search results and ion table.

### Supplementary image 1.11: PKA phosphorylated NFAT $m/z$ 3373.86

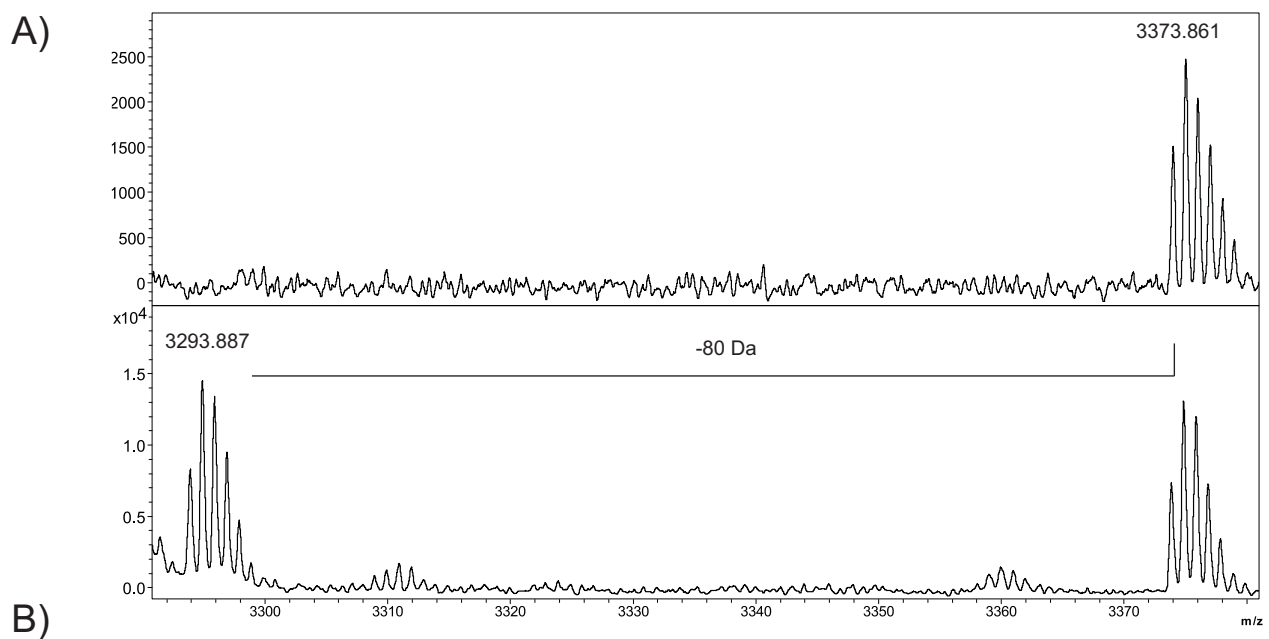

B)

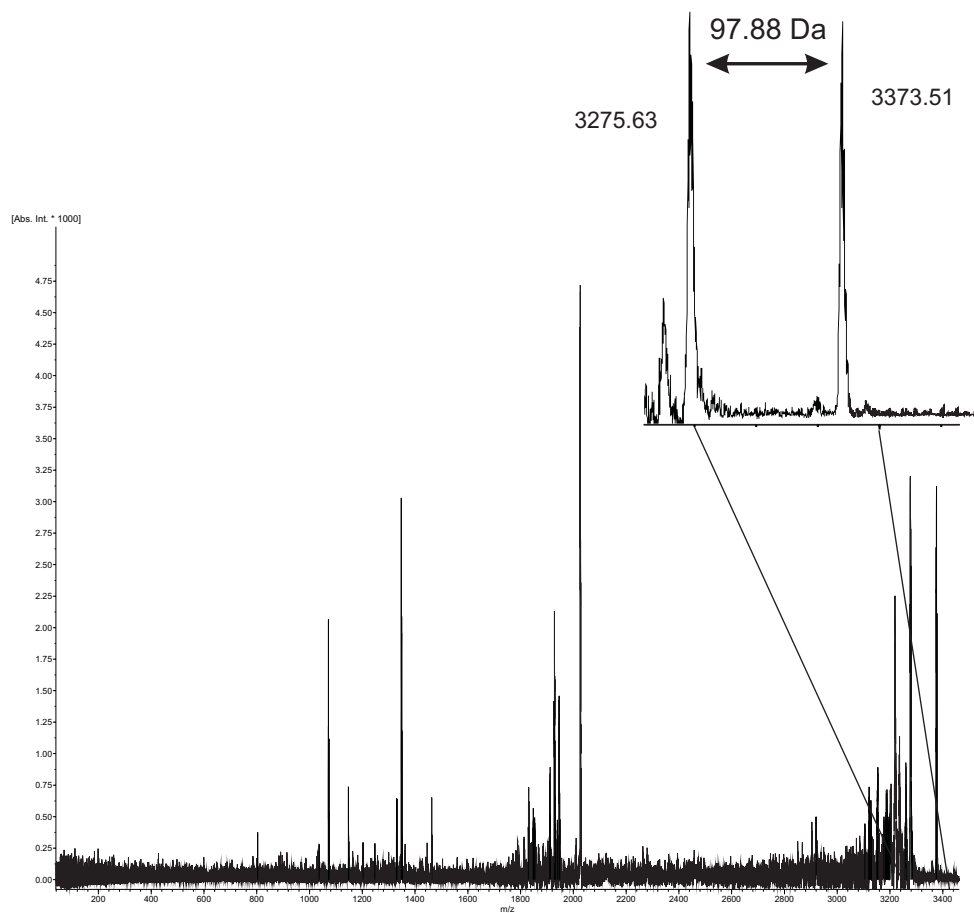

Part A: Mass shift of 80  $m/z$  after the alkaline phosphatase treatment.  
Part B: MS/MS spectrum and indication of neutral loss.

A)

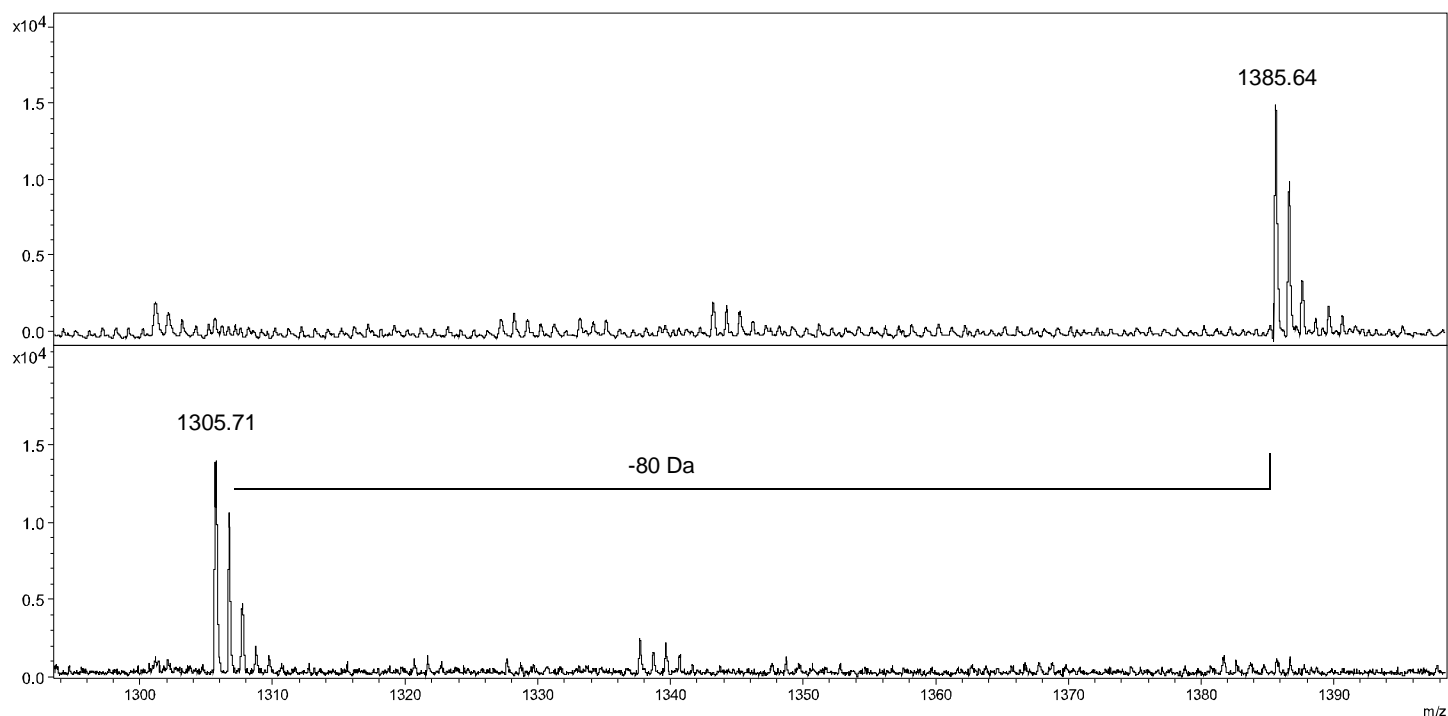

B)

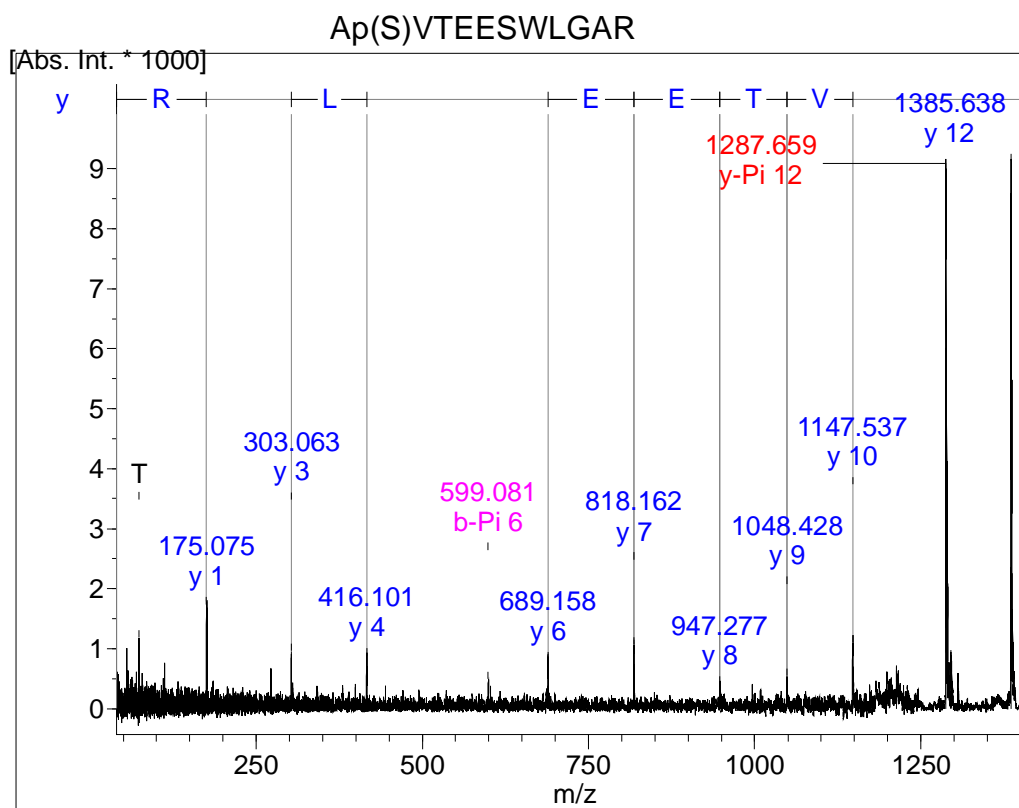

Monoisotopic mass of neutral peptide Mr(calc): 1384.6024  
 Fixed modifications: Carbamidomethyl (C)  
 Variable modifications:  
 S2 : Phospho (ST), with neutral losses 97.9769(shown in table), 0.0000  
 Ions Score: 77 Expect: 4.1e-05  
 Matches (**Bold Red**): 12/220 fragment ions using 12 most intense peaks

| #  | b         | b <sup>0</sup> | Seq. | y         | y*        | y <sup>0</sup> | #  |
|----|-----------|----------------|------|-----------|-----------|----------------|----|
| 1  | 72.0444   |                | A    |           |           |                | 12 |
| 2  | 141.0658  | 123.0553       | S    | 1216.5957 | 1199.5691 | 1198.5851      | 11 |
| 3  | 240.1343  | 222.1237       | V    | 1147.5742 | 1130.5477 | 1129.5636      | 10 |
| 4  | 341.1819  | 323.1714       | T    | 1048.5058 | 1031.4793 | 1030.4952      | 9  |
| 5  | 470.2245  | 452.214        | E    | 947.4581  | 930.4316  | 929.4476       | 8  |
| 6  | 599.2671  | 581.2566       | E    | 818.4155  | 801.389   | 800.405        | 7  |
| 7  | 686.2992  | 668.2886       | S    | 689.3729  | 672.3464  | 671.3624       | 6  |
| 8  | 872.3785  | 854.3679       | W    | 602.3409  | 585.3144  |                | 5  |
| 9  | 985.4625  | 967.452        | L    | 416.2616  | 399.235   |                | 4  |
| 10 | 1042.484  | 1024.4734      | G    | 303.1775  | 286.151   |                | 3  |
| 11 | 1113.5211 | 1095.5105      | A    | 246.1561  | 229.1295  |                | 2  |
| 12 |           |                | R    | 175.119   | 158.0924  |                | 1  |

Part A: Mass shift of 80 m/z after the alkaline phosphatase treatment.

Part B: MS/MS spectrum and peak annotation from Biotools and ion table from Mascot.

## Supplementary image 2.2: *in vivo* phosphorylated NFAT $m/z$ 2262.96

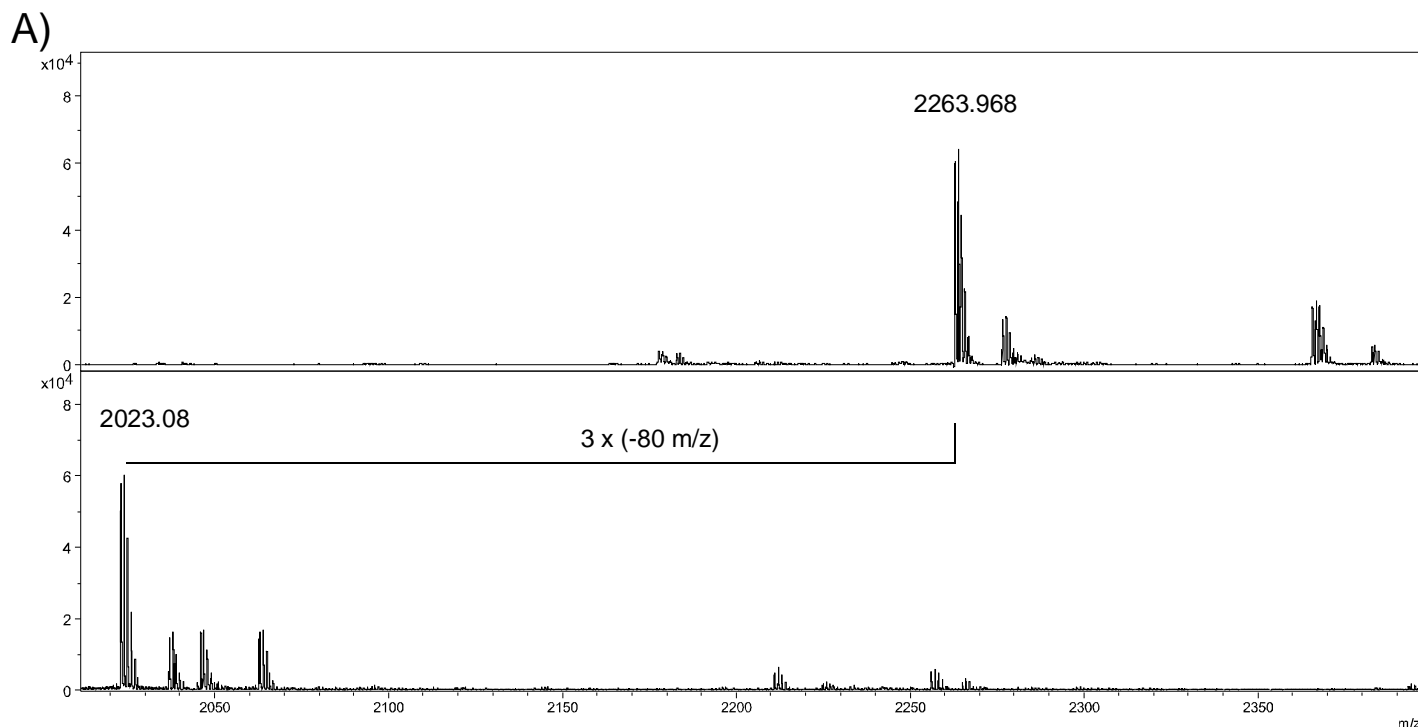

B) 224-GLGAcarb(C)TLLGp(S)PQHp(S)Pp(S)TSPR-243

Monoisotopic mass of neutral peptide  $M_r(\text{calc})$ : 2261.8943  
 Fixed modifications: Carbamidomethyl (C)  
 Variable modifications:  
 S10 : Phospho (ST), with neutral losses 0.0000(shown in table), 97.9769  
 S14 : Phospho (ST), with neutral losses 0.0000(shown in table), 97.9769  
 S16 : Phospho (ST), with neutral losses 0.0000(shown in table), 97.9769  
 Ions Score: 31 Expect: 18  
 Matches (highlighted): 23/532 fragment ions using 46 most intense peaks

| #  | b        | Seq. | y        | $y^0$    | #  |
|----|----------|------|----------|----------|----|
| 1  | 58.0287  | G    |          |          | 20 |
| 2  | 171.1128 | L    | 2205.88  | 2187.87  | 19 |
| 3  | 228.1343 | G    | 2092.796 | 2074.785 | 18 |
| 4  | 299.1714 | A    | 2035.775 | 2017.764 | 17 |
| 5  | 459.202  | C    | 1964.737 | 1946.727 | 16 |
| 6  | 560.2497 | T    | 1804.707 | 1786.696 | 15 |
| 7  | 673.3338 | L    | 1703.659 | 1685.649 | 14 |
| 8  | 786.4178 | L    | 1590.575 | 1572.565 | 13 |
| 9  | 843.4393 | G    | 1477.491 | 1459.48  | 12 |
| 10 | 1010.438 | S    | 1420.47  | 1402.459 | 11 |
| 11 | 1107.49  | P    | 1253.471 | 1235.461 | 10 |
| 12 | 1235.549 | Q    | 1156.418 | 1138.408 | 9  |
| 13 | 1372.608 | H    | 1028.36  | 1010.349 | 8  |
| 14 | 1539.606 | S    | 891.3009 | 873.2903 | 7  |
| 15 | 1636.659 | P    | 724.3025 | 706.292  | 6  |
| 16 | 1803.657 | S    | 627.2498 | 609.2392 | 5  |
| 17 | 1904.705 | T    | 460.2514 | 442.2409 | 4  |
| 18 | 1991.737 | S    | 359.2037 | 341.1932 | 3  |
| 19 | 2088.79  | P    | 272.1717 |          | 2  |
| 20 |          | R    | 175.119  |          | 1  |

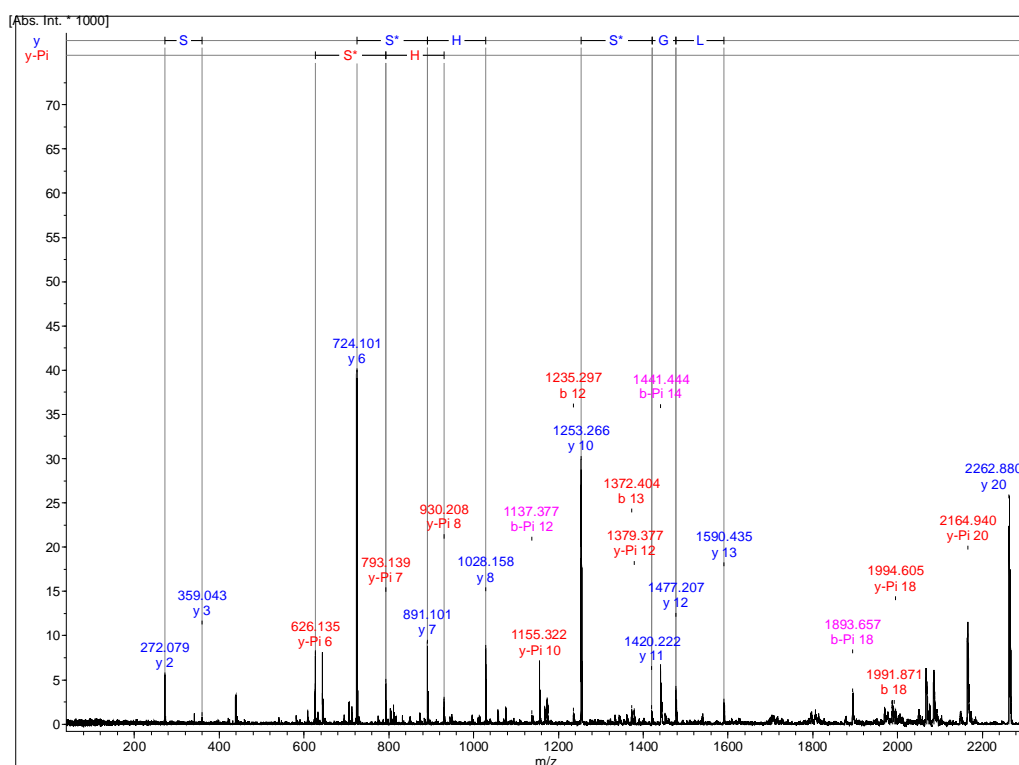

Part A: Mass shift of 80  $m/z$  after the alkaline phosphatase treatment.  
 Part B: MS/MS spectrum and peak annotation and ion table from Mascot.

## Supplementary image 2.3: *in vivo* phosphorylated NFAT *m/z* 2262.96

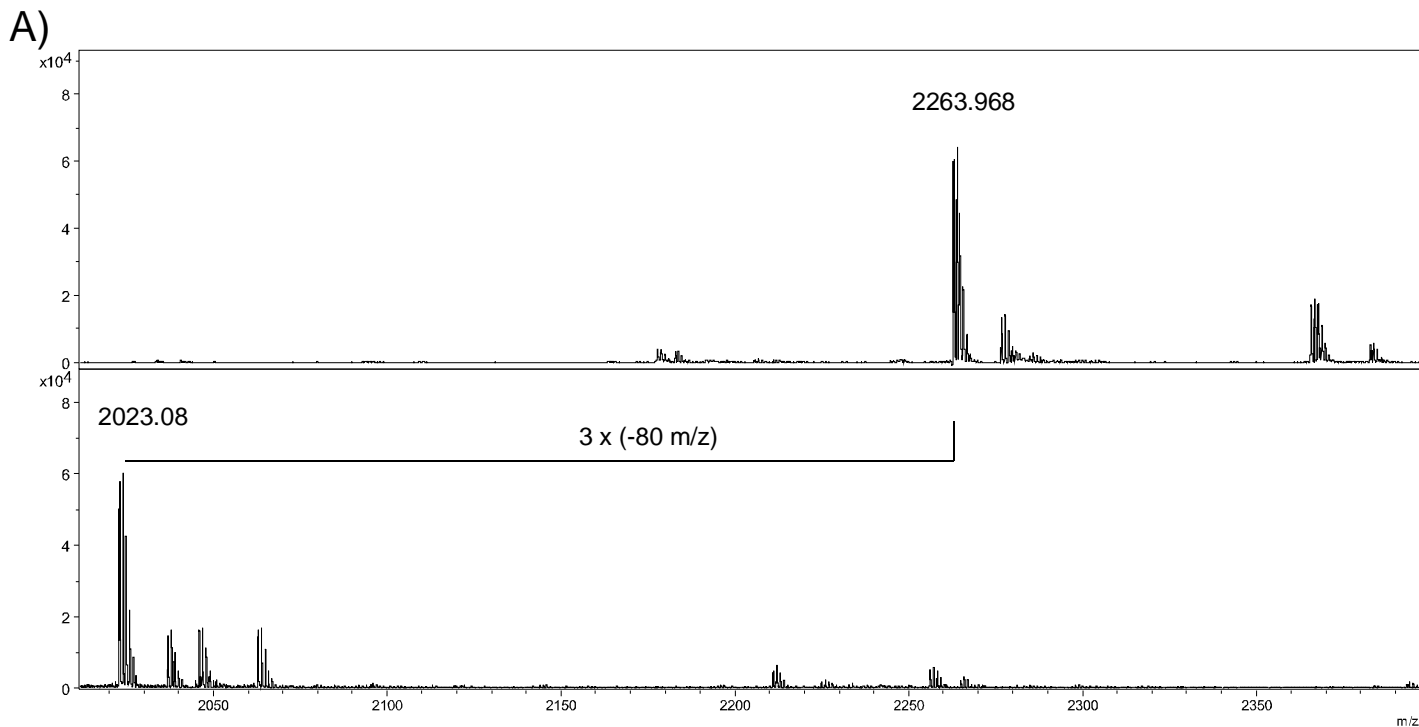

## B) 224-GLGAcarb(C)p(T)LLGp(S)PQHSPSTp(S)PR-243

Monoisotopic mass of neutral peptide  $M_r(\text{calc})$ : 2261.8943  
 Fixed modifications: Carbamidomethyl (C)  
 Variable modifications:  
 T6 : Phospho (ST), with neutral losses 0.0000(shown in table), 97.9769  
 S10 : Phospho (ST), with neutral losses 0.0000(shown in table), 97.9769  
 S18 : Phospho (ST), with neutral losses 0.0000(shown in table), 97.9769  
 Ions Score: 15 Expect:  $7.2\text{e}+02$   
 Matches (Highlighted): 25/575 fragment ions using 35 most intense peaks

| #  | Seq. | y        | $y^0$    | #  |
|----|------|----------|----------|----|
| 1  | G    |          |          | 20 |
| 2  | L    | 2205.88  | 2187.87  | 19 |
| 3  | G    | 2092.796 | 2074.785 | 18 |
| 4  | A    | 2035.775 | 2017.764 | 17 |
| 5  | C    | 1964.737 | 1946.727 | 16 |
| 6  | T    | 1804.707 | 1786.696 | 15 |
| 7  | L    | 1623.693 | 1605.682 | 14 |
| 8  | L    | 1510.609 | 1492.598 | 13 |
| 9  | G    | 1397.525 | 1379.514 | 12 |
| 10 | S    | 1340.503 | 1322.493 | 11 |
| 11 | P    | 1173.505 | 1155.494 | 10 |
| 12 | Q    | 1076.452 | 1058.442 | 9  |
| 13 | H    | 948.3935 | 930.3829 | 8  |
| 14 | S    | 811.3346 | 793.324  | 7  |
| 15 | P    | 724.3025 | 706.292  | 6  |
| 16 | S    | 627.2498 | 609.2392 | 5  |
| 17 | T    | 540.2177 | 522.2072 | 4  |
| 18 | S    | 439.1701 | 421.1595 | 3  |
| 19 | P    | 272.1717 |          | 2  |
| 20 | R    | 175.119  |          | 1  |

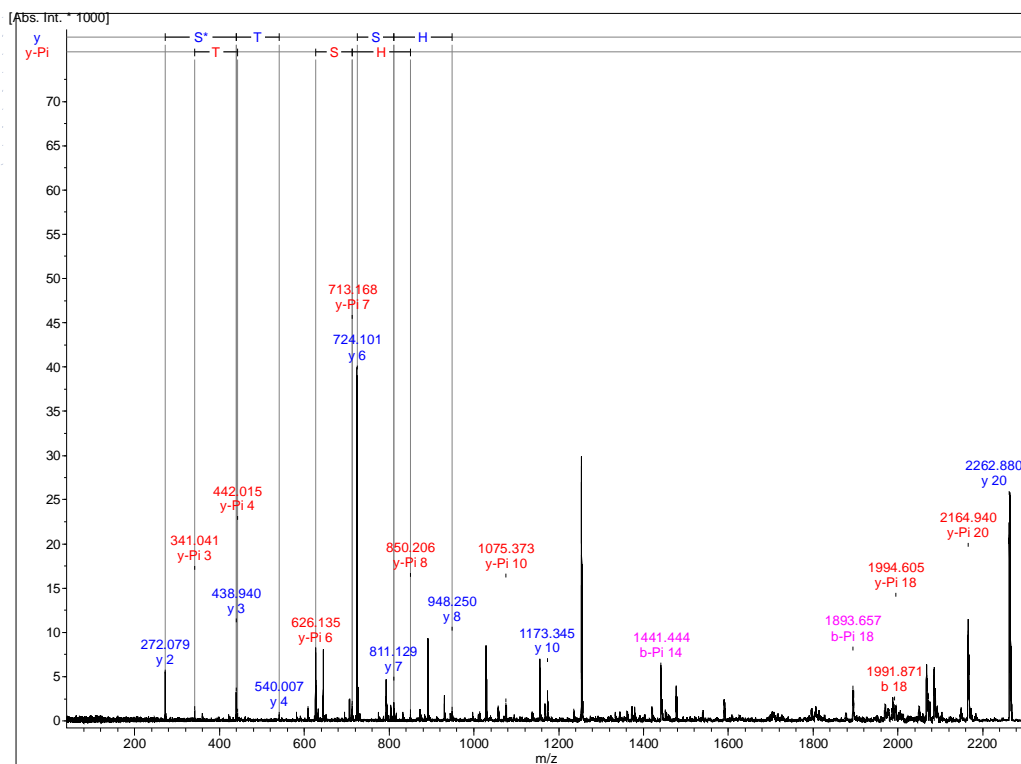

Part A: Mass shift of 80 *m/z* after the alkaline phosphatase treatment.

Part B: MS/MS spectrum, peak annotation from Biotoools and ion table from Mascot.

### Supplementary image 2.4: *in vivo* phosphorylated NFAT *m/z* 2382.90

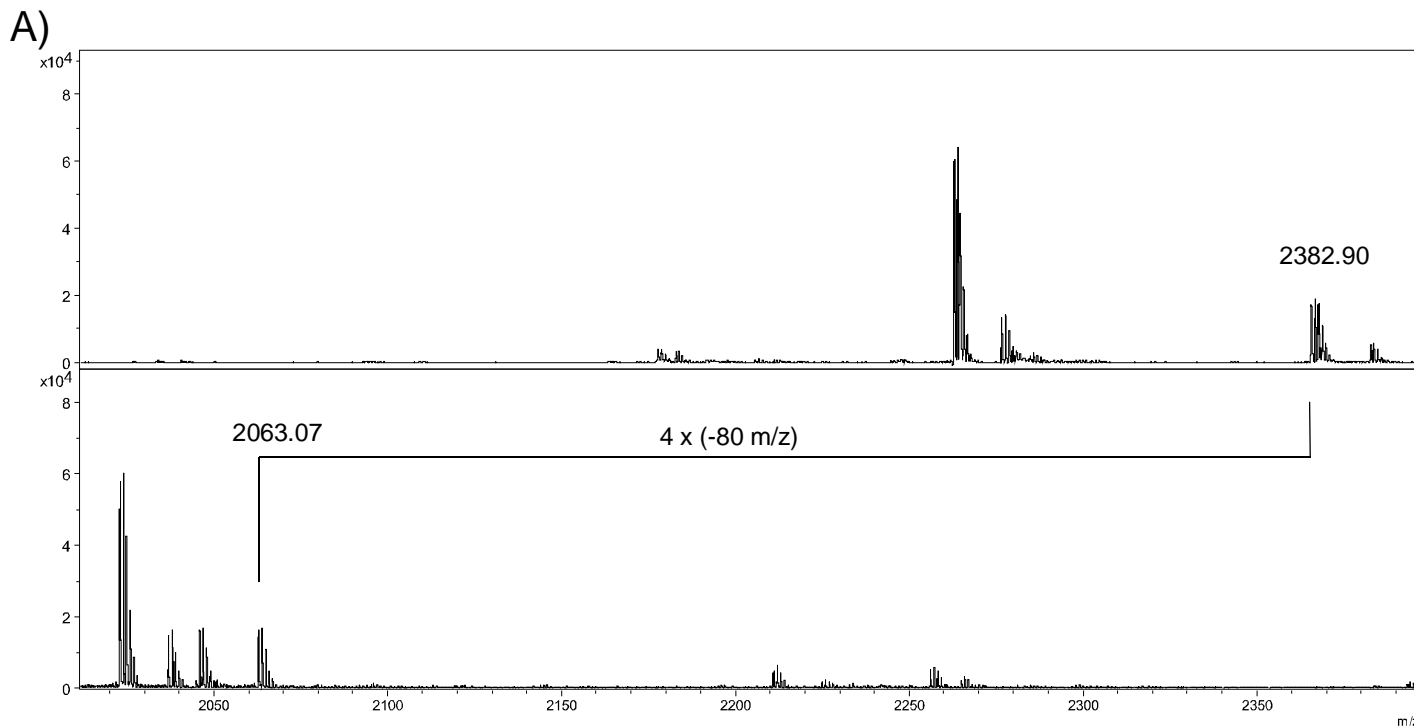

### QPPYp(S)PHHp(S)Pp(T)Pp(S)PHGSPR

B)

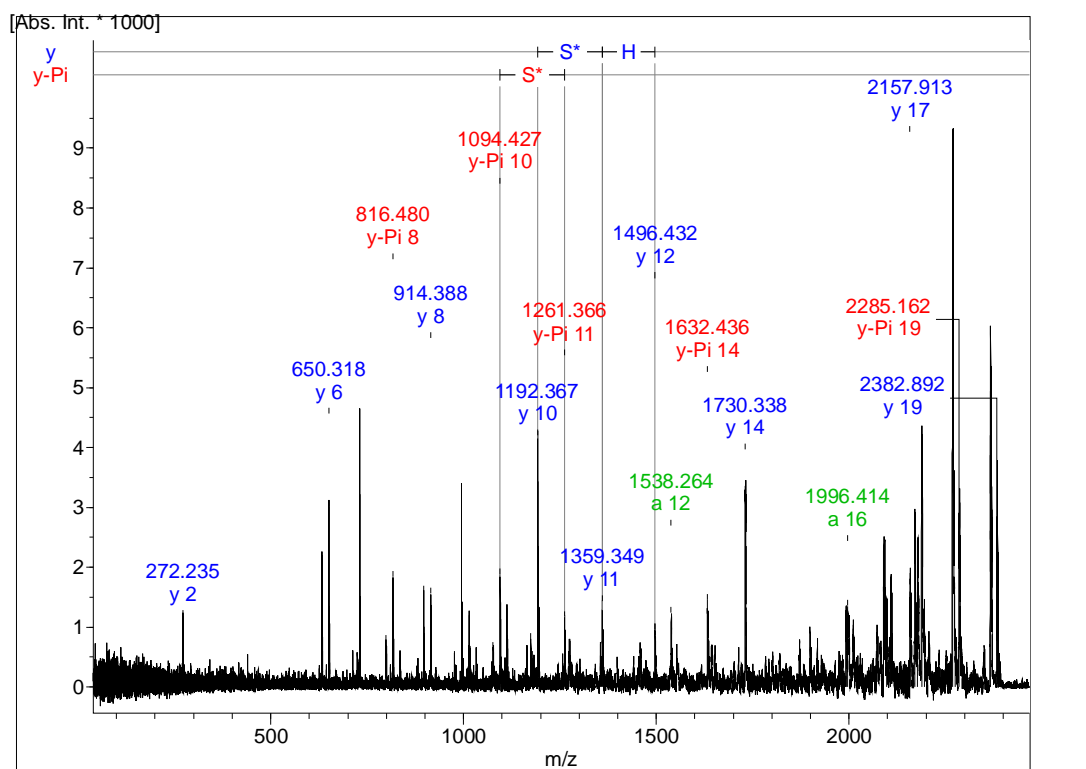

Monoisotopic mass of neutral peptide Mr(calc): 2381.8422

Fixed modifications: Carbamidomethyl (C)

Variable modifications:

S5 : Phospho (ST), with neutral losses 0.0000(shown in table), 97.9769

S9 : Phospho (ST), with neutral losses 0.0000(shown in table), 97.9769

T11 : Phospho (ST), with neutral losses 0.0000(shown in table), 97.9769

S13 : Phospho (ST), with neutral losses 0.0000(shown in table), 97.9769

Ions Score: 26 Expect: 0.00054

Matches (highlighted): 17/546 fragment ions using 39 most intense peaks

| #  | b         | b*        | b <sup>+</sup> | Seq. | y         | y*        | y <sup>+</sup> | #  |
|----|-----------|-----------|----------------|------|-----------|-----------|----------------|----|
| 1  | 129.0659  | 112.0393  |                | Q    |           |           |                | 19 |
| 2  | 226.1184  | 209.0921  |                | P    | 2254.7909 | 2237.7644 | 2236.7804      | 18 |
| 3  | 323.1714  | 306.1448  |                | P    | 2157.2382 | 2140.2116 | 2139.2276      | 17 |
| 4  | 486.2347  | 469.2082  |                | Y    | 2060.6854 | 2043.6588 | 2042.6748      | 16 |
| 5  | 653.2331  | 636.2065  | 635.2225       | S    | 1897.6221 | 1880.5955 | 1879.6115      | 15 |
| 6  | 750.2858  | 733.2593  | 732.2753       | P    | 1730.6237 | 1713.5972 | 1712.6131      | 14 |
| 7  | 887.3447  | 870.3182  | 869.3342       | H    | 1633.5709 | 1616.5444 | 1615.5604      | 13 |
| 8  | 1024.4037 | 1007.3771 | 1006.3931      | H    | 1496.512  | 1479.4855 | 1478.5015      | 12 |
| 9  | 1191.402  | 1174.3755 | 1173.3914      | S    | 1359.4531 | 1342.4266 | 1341.4426      | 11 |
| 10 | 1288.4548 | 1271.4282 | 1270.4442      | P    | 1192.4548 | 1175.4282 | 1174.4442      | 10 |
| 11 | 1469.4688 | 1452.4422 | 1451.4582      | T    | 1095.402  | 1078.3755 | 1077.3914      | 9  |
| 12 | 1566.5215 | 1549.495  | 1548.511       | P    | 914.388   | 897.3615  | 896.3774       | 8  |
| 13 | 1733.5199 | 1716.4933 | 1715.5093      | S    | 817.3352  | 800.3087  | 799.3247       | 7  |
| 14 | 1830.5727 | 1813.5461 | 1812.5621      | P    | 650.3369  | 633.3103  | 632.3263       | 6  |
| 15 | 1967.6316 | 1950.605  | 1949.621       | H    | 553.2841  | 536.2576  | 535.2736       | 5  |
| 16 | 2024.653  | 2007.6265 | 2006.6425      | G    | 416.2252  | 399.1987  | 398.2146       | 4  |
| 17 | 2111.6851 | 2094.6585 | 2093.6745      | S    | 359.2037  | 342.1772  | 341.1932       | 3  |
| 18 | 2208.7378 | 2191.7113 | 2190.7273      | P    | 272.1717  | 255.1452  |                | 2  |
| 19 |           |           |                | R    | 175.119   | 158.0924  |                | 1  |

Part A: Mass shift of 80 *m/z* after the alkaline phosphatase treatment.

Part B: MS/MS spectrum and peak annotation from Biotoools and ion table from Mascot.

### Supplementary image 2.5: *in vivo* phosphorylated NFAT *m/z* 2382.90

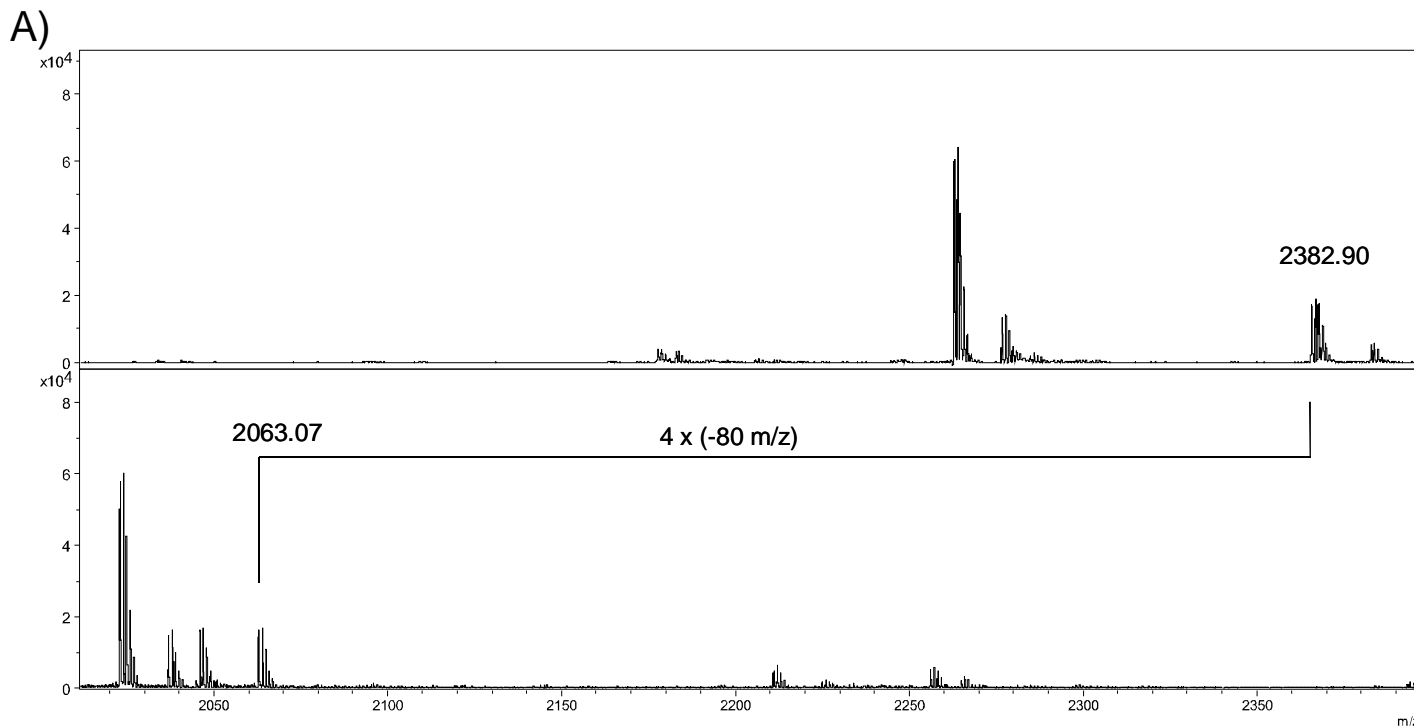

B)

### QPPYp(S)PHHp(S)Pp(T)PSPHGp(S)PR

| #  | Seq. | y         | y <sup>0</sup> | #  |
|----|------|-----------|----------------|----|
| 1  | Q    |           |                | 19 |
| 2  | P    | 2254.7909 | 2236.7804      | 18 |
| 3  | P    | 2157.7382 | 2139.7276      | 17 |
| 4  | Y    | 2060.6854 | 2042.6748      | 16 |
| 5  | S    | 1897.6221 | 1879.6115      | 15 |
| 6  | P    | 1730.6237 | 1712.6131      | 14 |
| 7  | H    | 1633.5709 | 1615.5604      | 13 |
| 8  | H    | 1496.512  | 1478.5015      | 12 |
| 9  | S    | 1359.4531 | 1341.4426      | 11 |
| 10 | P    | 1192.4548 | 1174.4442      | 10 |
| 11 | T    | 1095.402  | 1077.3914      | 9  |
| 12 | P    | 914.388   | 896.3774       | 8  |
| 13 | S    | 817.3352  | 799.3247       | 7  |
| 14 | P    | 730.3032  | 712.2926       | 6  |
| 15 | H    | 633.2504  | 615.2399       | 5  |
| 16 | G    | 496.1915  | 478.181        | 4  |
| 17 | S    | 439.1701  | 421.1595       | 3  |
| 18 | P    | 272.1717  |                | 2  |
| 19 | R    | 175.119   |                | 1  |

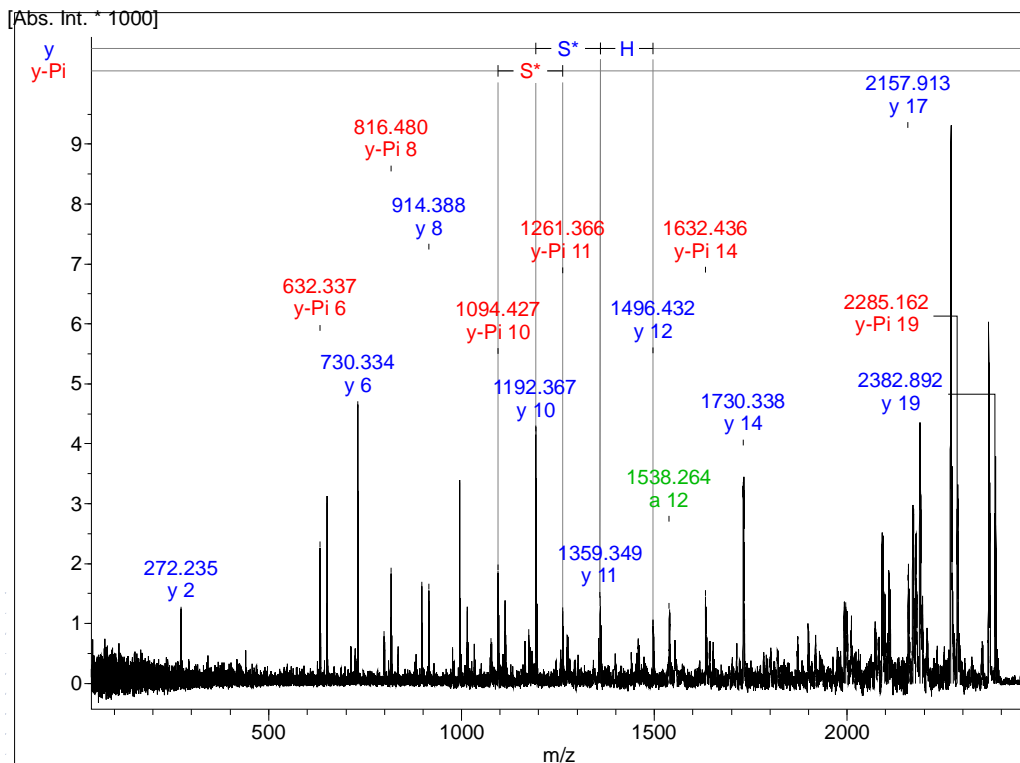

Monoisotopic mass of neutral peptide Mr(calc): 2381.8422

Fixed modifications: Carbamidomethyl (C)

Variable modifications:

S5 : Phospho (ST), with neutral losses 0.0000(shown in table), 97.9769

S9 : Phospho (ST), with neutral losses 0.0000(shown in table), 97.9769

T11 : Phospho (ST), with neutral losses 0.0000(shown in table), 97.9769

S17 : Phospho (ST), with neutral losses 0.0000(shown in table), 97.9769

Ions Score: 23 Expect: 0.0011

Matches (highlighted): 18/575 fragment ions using 39 most intense peaks

Part A: Mass shift of 80 *m/z* after the alkaline phosphatase treatment.

Part B: MS/MS spectrum and peak annotation from Biotoools and ion table from Mascot.



## Supplementary image 2.6: *in vivo* phosphorylated NFAT *m/z* 2382.90

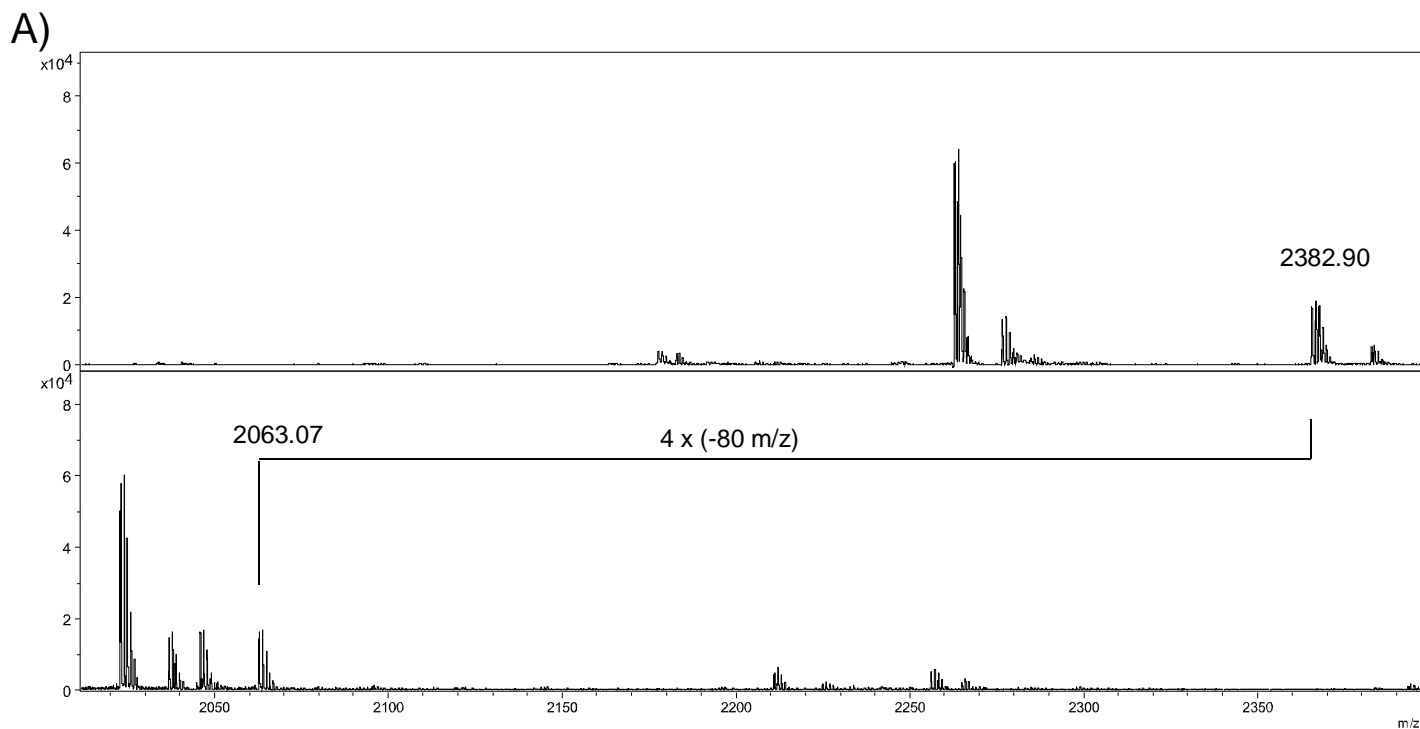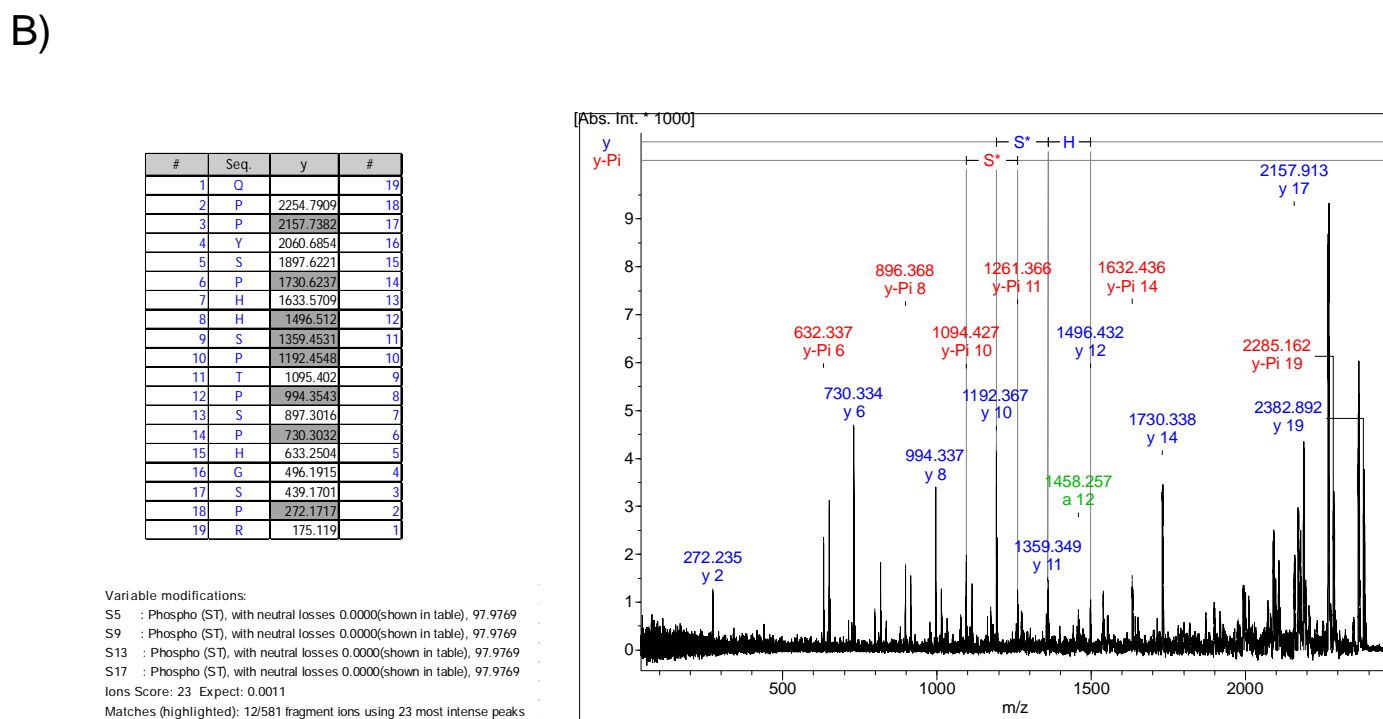

Part A: Mass shift of 80 *m/z* after the alkaline phosphatase treatment.

Part B: MS/MS spectrum and peak annotation from Biotools and ion table from Mascot.

## Supplementary image 2.7: *in vivo* phosphorylated NFAT *m/z* 3233.47

A)

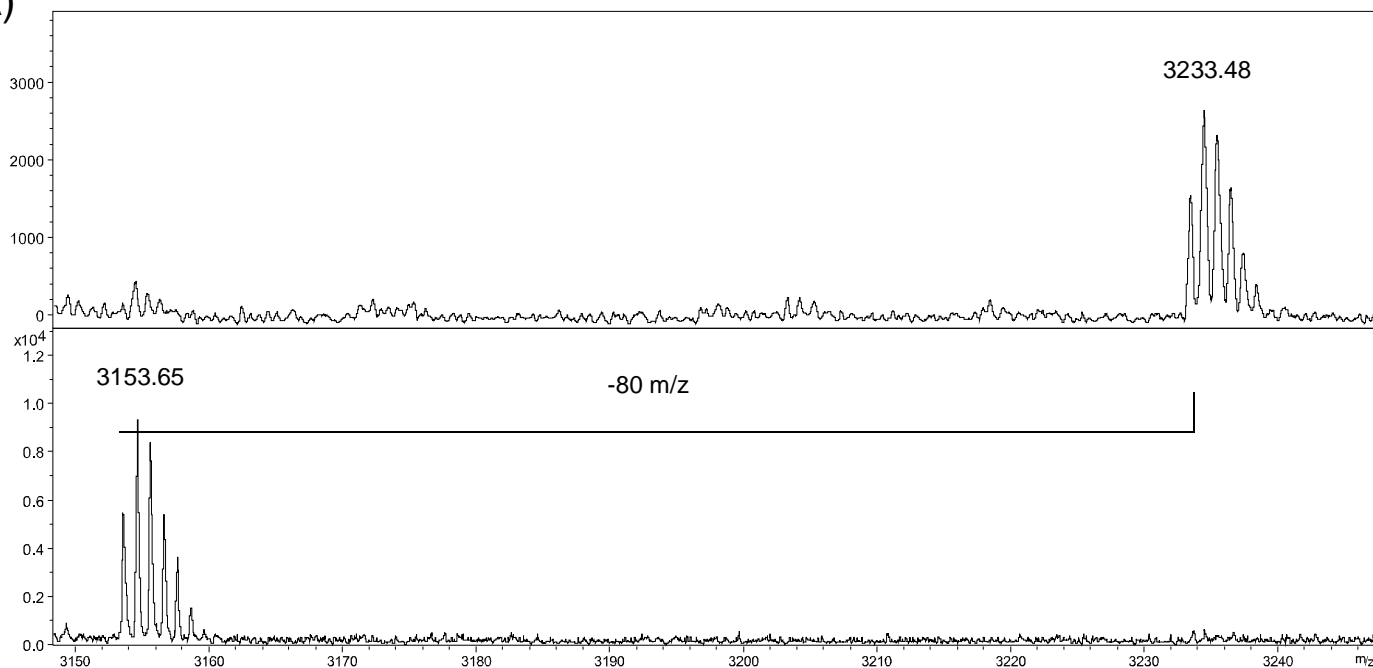

B)

### VEPVGEDLGp(S)PPPPADDFAPEDYSSFQHIR

| #  | Seq. | y        | #  |
|----|------|----------|----|
| 1  | V    |          | 29 |
| 2  | E    | 3036.401 | 28 |
| 3  | P    | 2907.358 | 27 |
| 4  | V    | 2810.306 | 26 |
| 5  | G    | 2711.237 | 25 |
| 6  | E    | 2654.216 | 24 |
| 7  | D    | 2525.173 | 23 |
| 8  | L    | 2410.146 | 22 |
| 9  | G    | 2297.062 | 21 |
| 10 | S    | 2240.041 | 20 |
| 11 | P    | 2171.019 | 19 |
| 12 | P    | 2073.967 | 18 |
| 13 | P    | 1976.914 | 17 |
| 14 | P    | 1879.861 | 16 |
| 15 | A    | 1782.808 | 15 |
| 16 | D    | 1711.771 | 14 |
| 17 | F    | 1596.744 | 13 |
| 18 | A    | 1449.676 | 12 |
| 19 | P    | 1378.639 | 11 |
| 20 | E    | 1281.586 | 10 |
| 21 | D    | 1152.543 | 9  |
| 22 | Y    | 1037.516 | 8  |
| 23 | S    | 874.453  | 7  |
| 24 | S    | 787.4209 | 6  |
| 25 | F    | 700.3889 | 5  |
| 26 | Q    | 553.3205 | 4  |
| 27 | H    | 425.2619 | 3  |
| 28 | I    | 288.203  | 2  |
| 29 | R    | 175.119  | 1  |

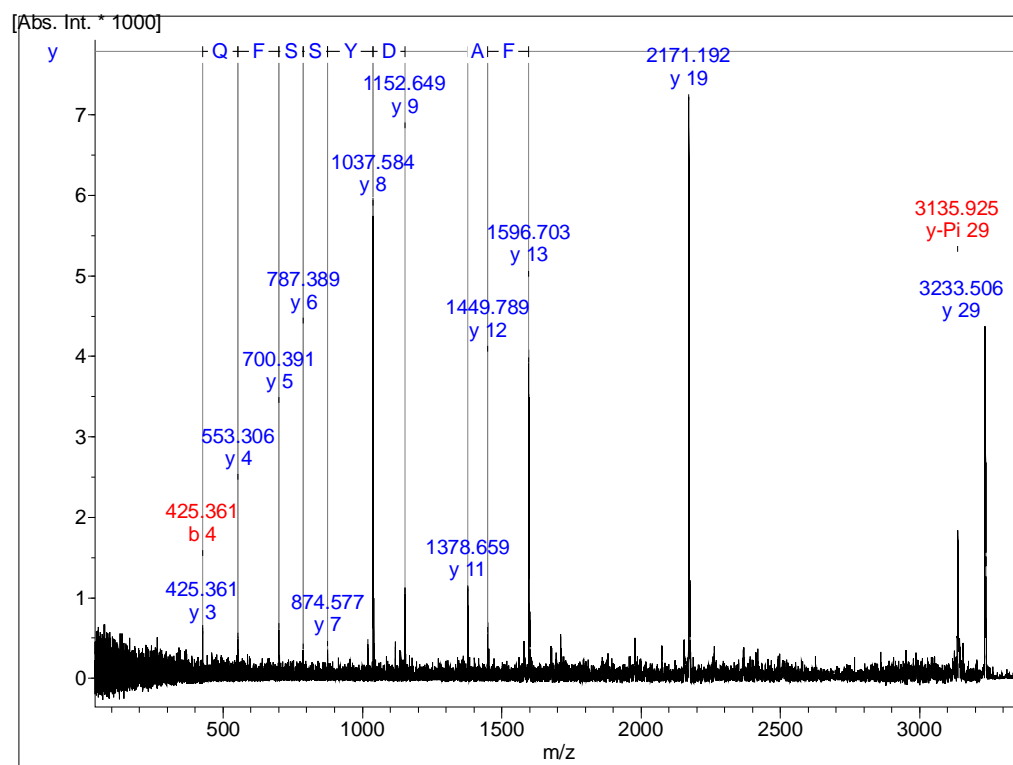

Monoisotopic mass of neutral peptide  $M_r(\text{calc})$ : 3232.4390  
 Fixed modifications: Carbamidomethyl (C)  
 Variable modifications:  
 S10 : Phospho (ST), with neutral losses 97.9769 (shown in table), 0.0000  
 Ions Score: 106 Expect: 4.1e-12  
 Matches (highlighted): 17/706 fragment ions using 13 most intense peaks

Part A: Mass shift of 80 *m/z* after the alkaline phosphatase treatment.

Part B: MS/MS spectrum and peak annotation from Biotoools. Ion table from Mascot.

### Supplementary image 3: TiO<sub>2</sub> purification of $\alpha$ - and $\beta$ - casein dilution series

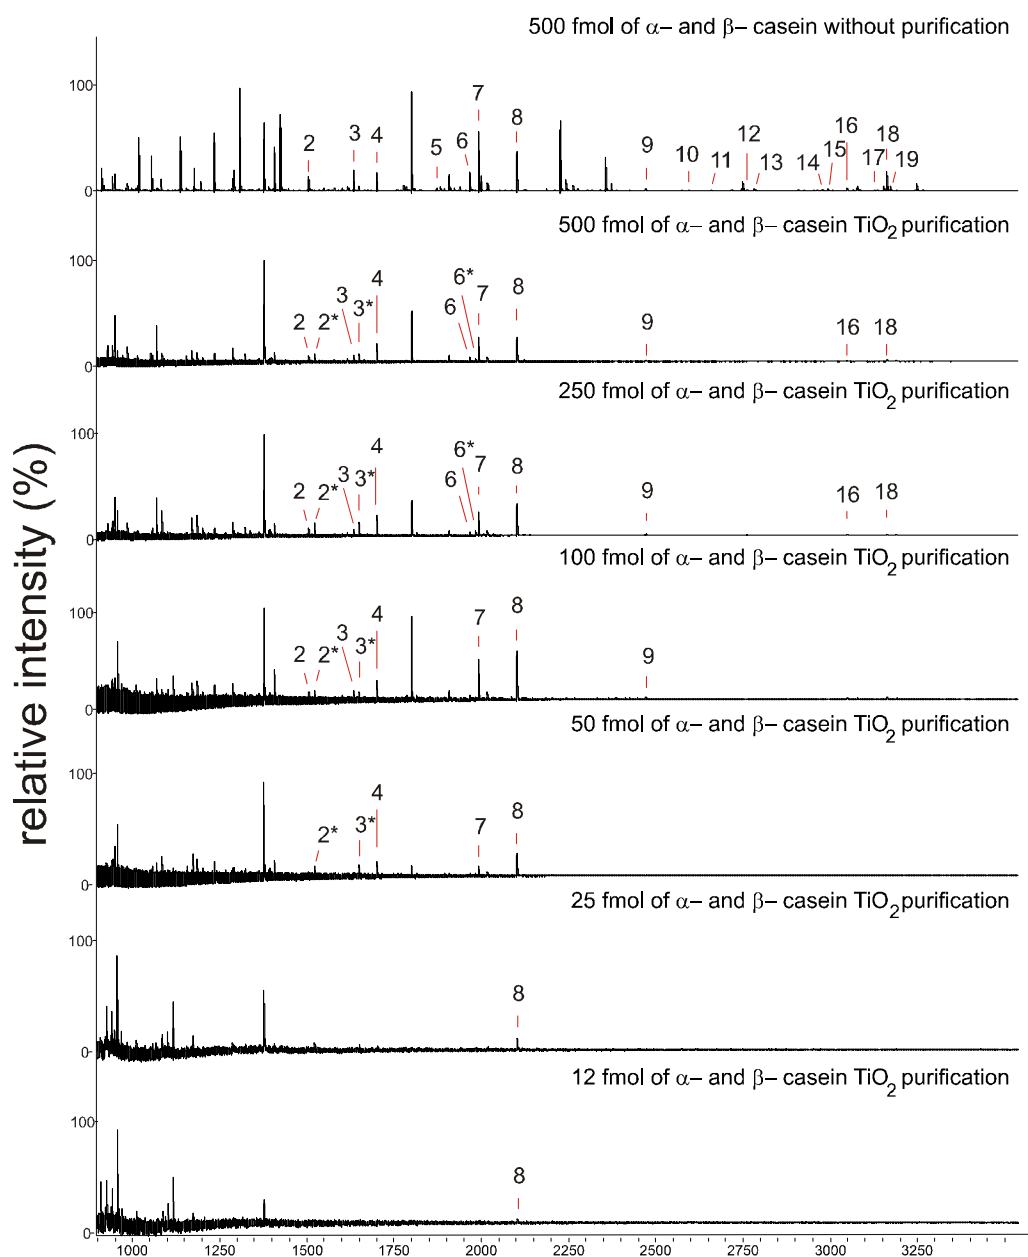

**Supplementary image3:** 3000 laser shots were accumulated with the following laser power settings: sample without TiO<sub>2</sub> treatment at 31%; TiO<sub>2</sub> treated samples from 500 fmol to 50 fmol at 40%; 25 and 12 fmol samples at 56% and 61% respectively. In all other cases 2000 laser shots were accumulated. The \* denotes the oxidized phosphopeptides, and the numbers indicate phosphopeptides, which are also detailed in Supplementary Table 3.

### Supplementary image 4: ITO purification of $\alpha$ - and $\beta$ - casein dilution series

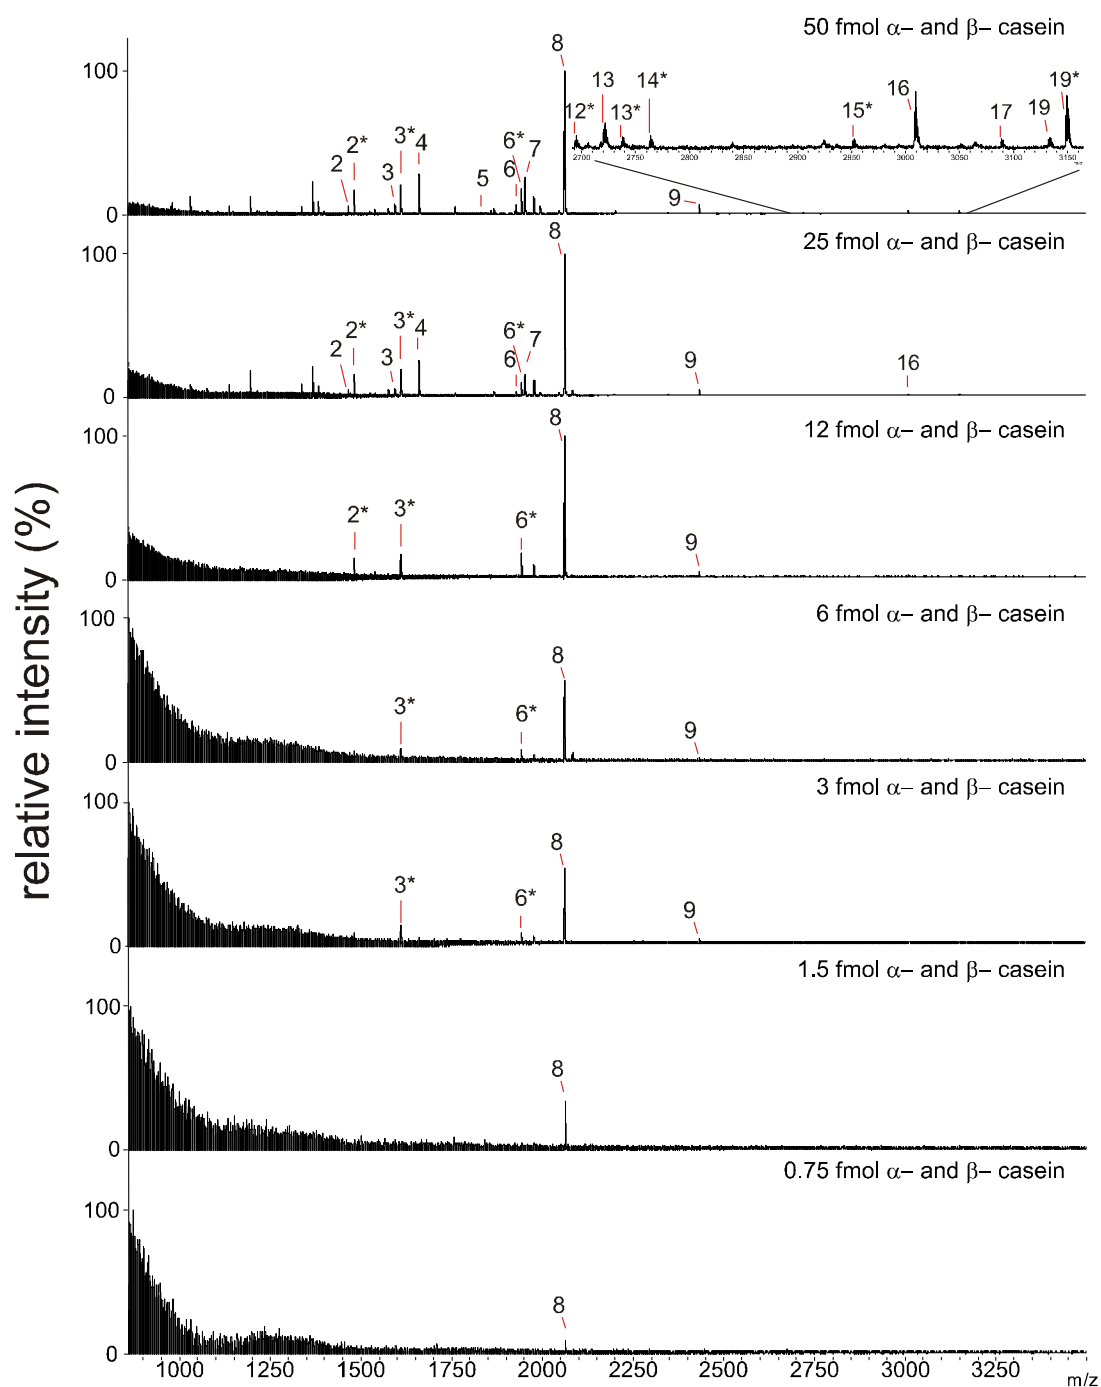

**Supplementary image 4:** A dilution series of  $\alpha$ - and  $\beta$ -casein peptides were spotted on ITO-coated glass slides and treated according to the optimized protocol for selective retention of phosphopeptides. Numbers indicate detected phosphopeptides described in detail in Supplementary Table 3. Two thousand laser shots were accumulated in each spectrum under the following laser settings: 36% for 50 and 25 fmol; 40 % for 12, 6, 3 and 1.5 fmol; and 48 % for 0.75 fmol.

### Supplementary image 5: ITO purification of 500 fmol $\alpha$ - and $\beta$ - casein

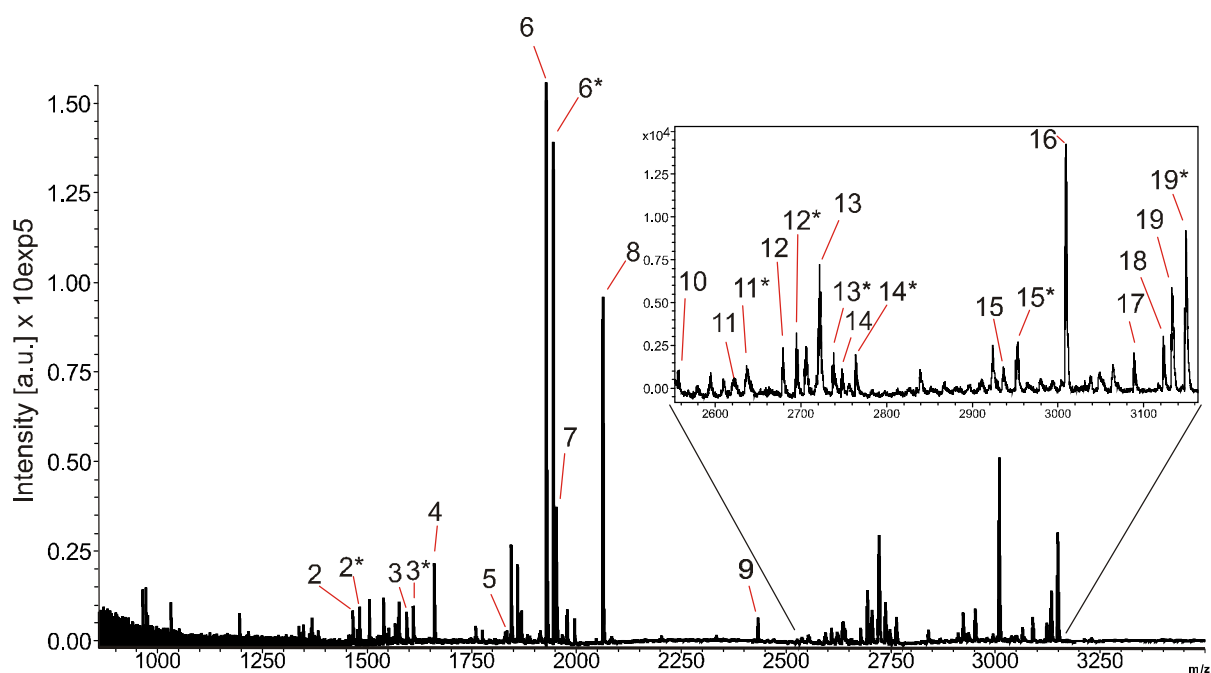

**Supplementary image 5:** A mixture of  $\alpha$ - and  $\beta$ -casein peptides (500 fmol each) was analyzed using the phosphopeptide purification optimized protocol in this study. Two thousand laser shots were accumulated with 40 % laser power setting. 18 different phosphopeptides were detected, as well as 9 additional oxidized forms. The \* denotes the oxidized phosphopeptides, and the numbers indicate phosphopeptides, which are also detailed in Supplementary Table 3.

## Supplementary image 6 and 7

For comparison of the different enrichment platforms (ITO vs TiO<sub>2</sub>-enrichment & AnchorChip) the sensitivity of the laser power setting was kept constant (2000 laser shots, 50 % laser power, 64 % offset and 15 % range). Spectra acquired from the ITO plate at two different laser settings, after identical the planar-enrichment procedure, are also shown in Supplementary image 6, panels A and C. The spectra acquired from the AnchorChip plate after TiO<sub>2</sub>-enrichment is shown in panel B. We observed best measurements of the resolution for the peptides from ITO (6C) when the laser power was at 2000 laser shots, 46% laser power, 64 % offset, 15% range. However, to facilitate comparisons between measurements, the laser settings were kept constant throughout the entire dilution series test (Supplementary image 6A and B; manuscript figure 3).

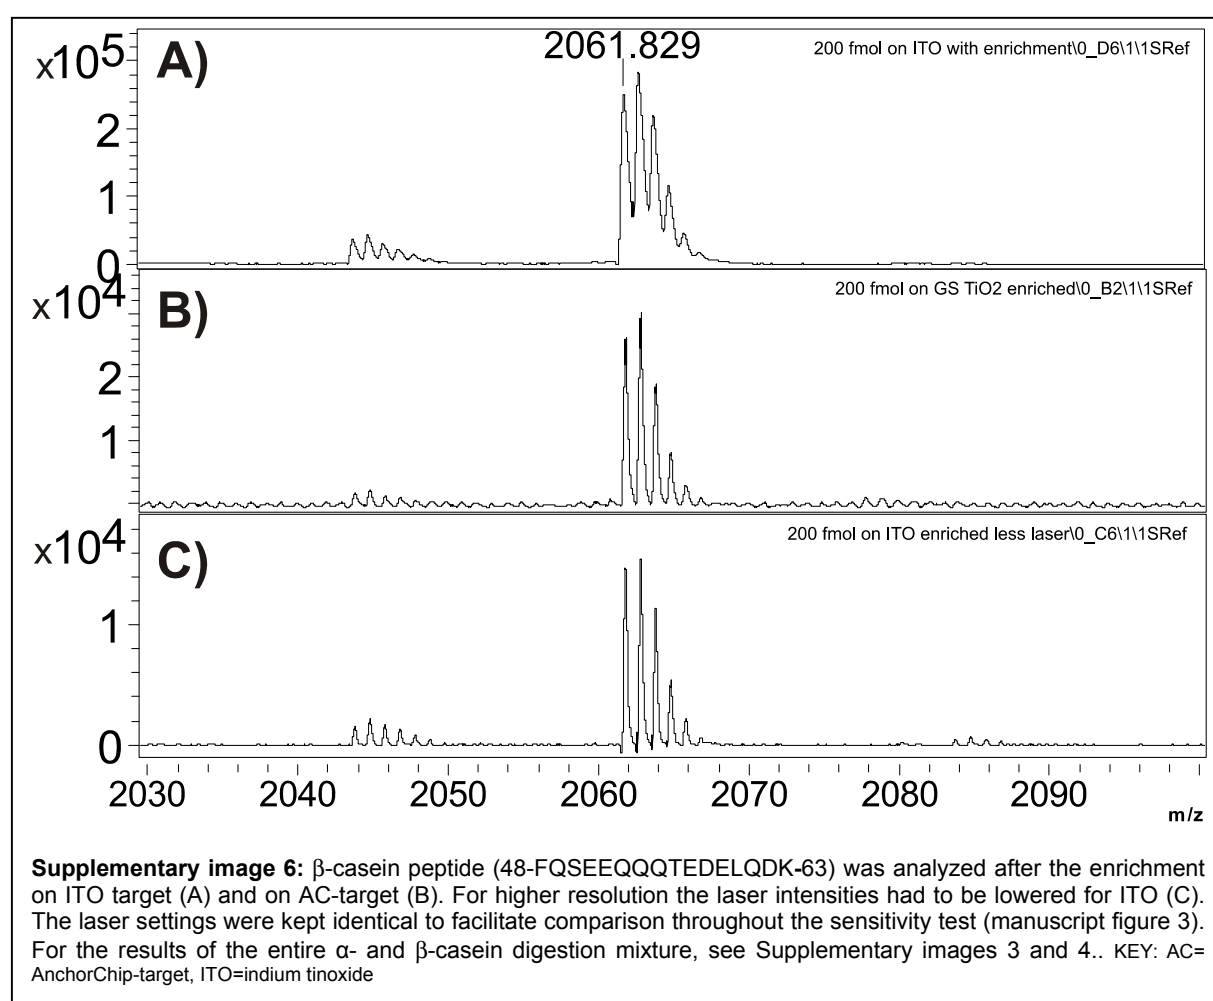

Optimising the laser intensity for each surface, to facilitate optimal ionization of the peptides can be due to several factors that we can only speculate on. Obviously the surface chemistry the ITO plate is different to the AnchorChip. This could have a direct impact on the ionization efficiency of peptides in general. On the other hand the effect

## Supplementary image 6 and 7

may be more specific and only related to the ionization of (phospho)-peptides. One might consider that the ITO surface retains phosphopeptides more efficiently and therefore requires different laser settings. Another possibility is that the flat surface method (ITO) does not adhere phosphopeptide samples efficiently chromatographic techniques, and there is more left to analyse ultimately. Of course there could be a combination of the above reasons and more that we are not sure of at this point. Nevertheless, we noticed this phenomenon that appeared to be ionization efficiency when trying to compare the planar surface enrichment with chromatographic method (Figure 3 in manuscript and Supplementary images 3 and 4). In the sensitivity test on a single peptide (Manuscript figure 3) the laser intensity was kept constant, which lead to low resolution for samples analyzed from ITO. However, when analyzing the mixture of  $\alpha$ - and  $\beta$ -casein the laser intensity was adjusted to produce best resolution for both of the samples (Supplementary image 3 and 4). These results also show that less laser power is required for the ITO method.

Finally, the dilution series presented in Supplementary image 4 ( $\alpha$ - and  $\beta$ -casein mixture enrichment on ITO) are presented here as a “zoomed images”. The 6 fmol loading compares with the loading in figure 3 of the manuscript, but with optimal laser settings.

## Supplementary image 6 and 7

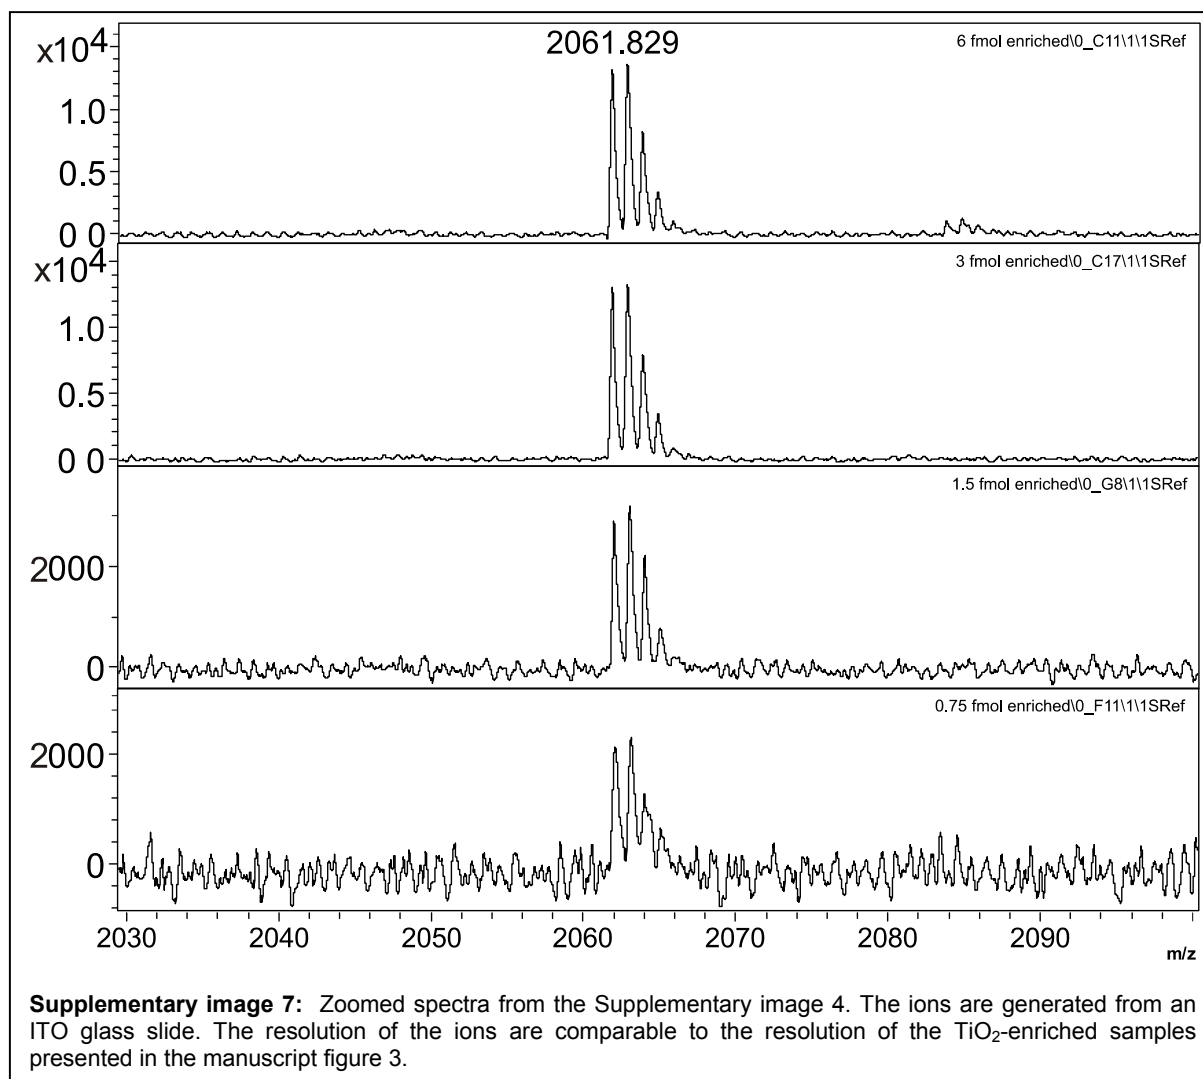



## Supplementary image S1: PIM phosphorylated NFAT $m/z$ 1257.5

A)

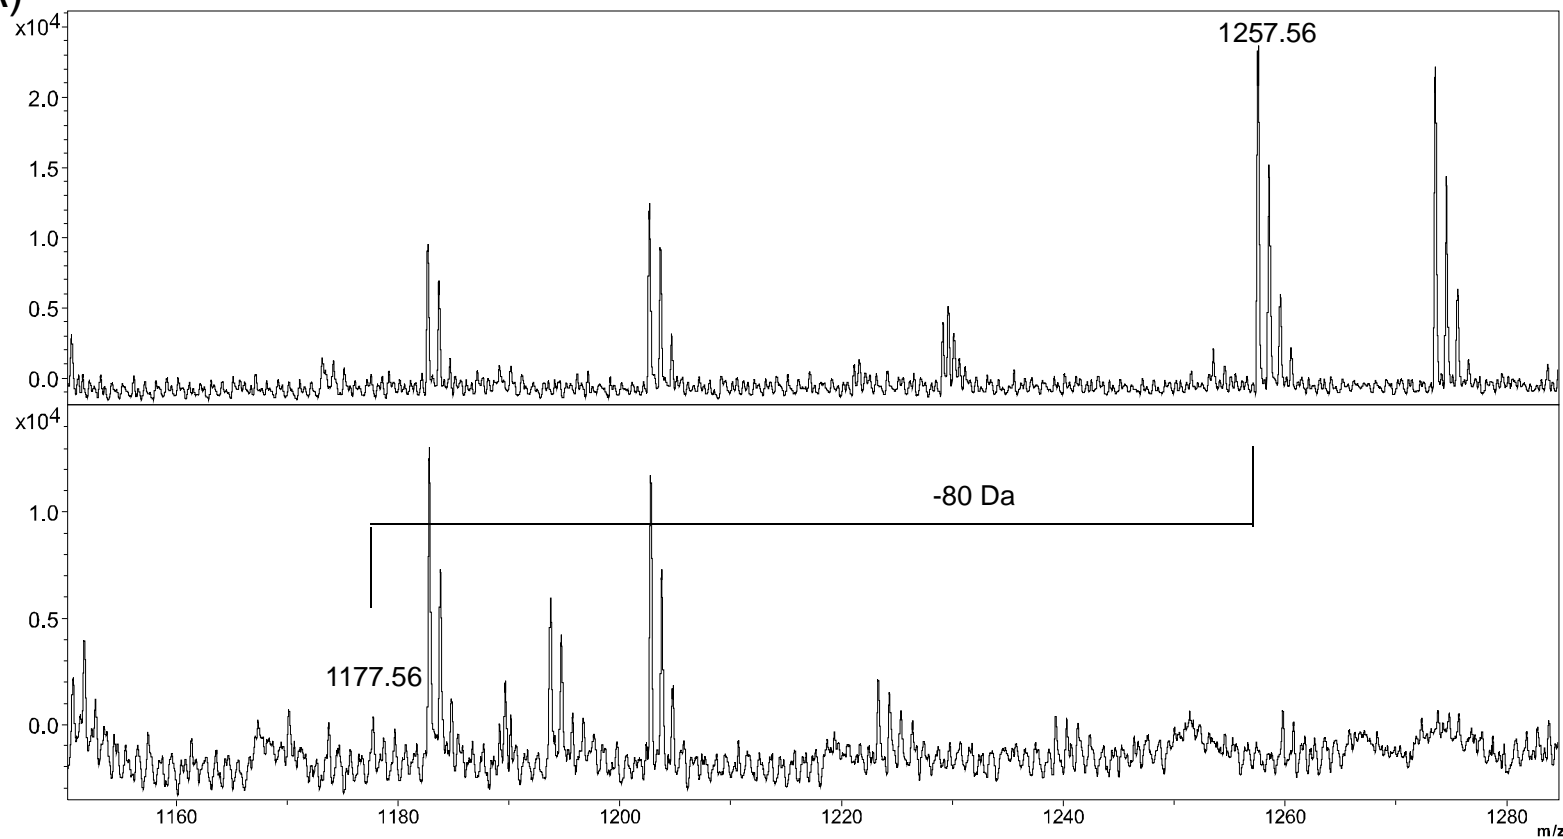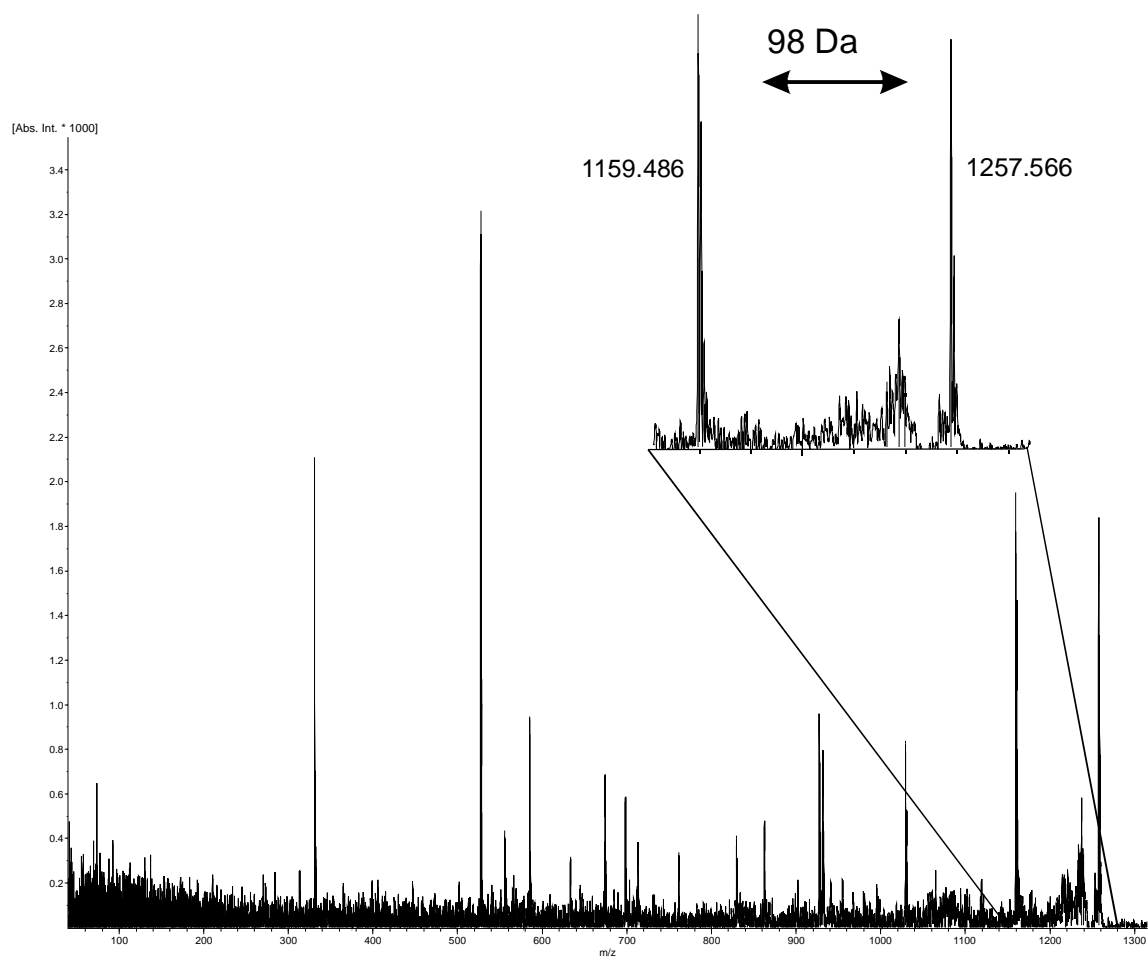

### Supplementary image S1\*: PIM phosphorylated NFAT $m/z$ 1273.59

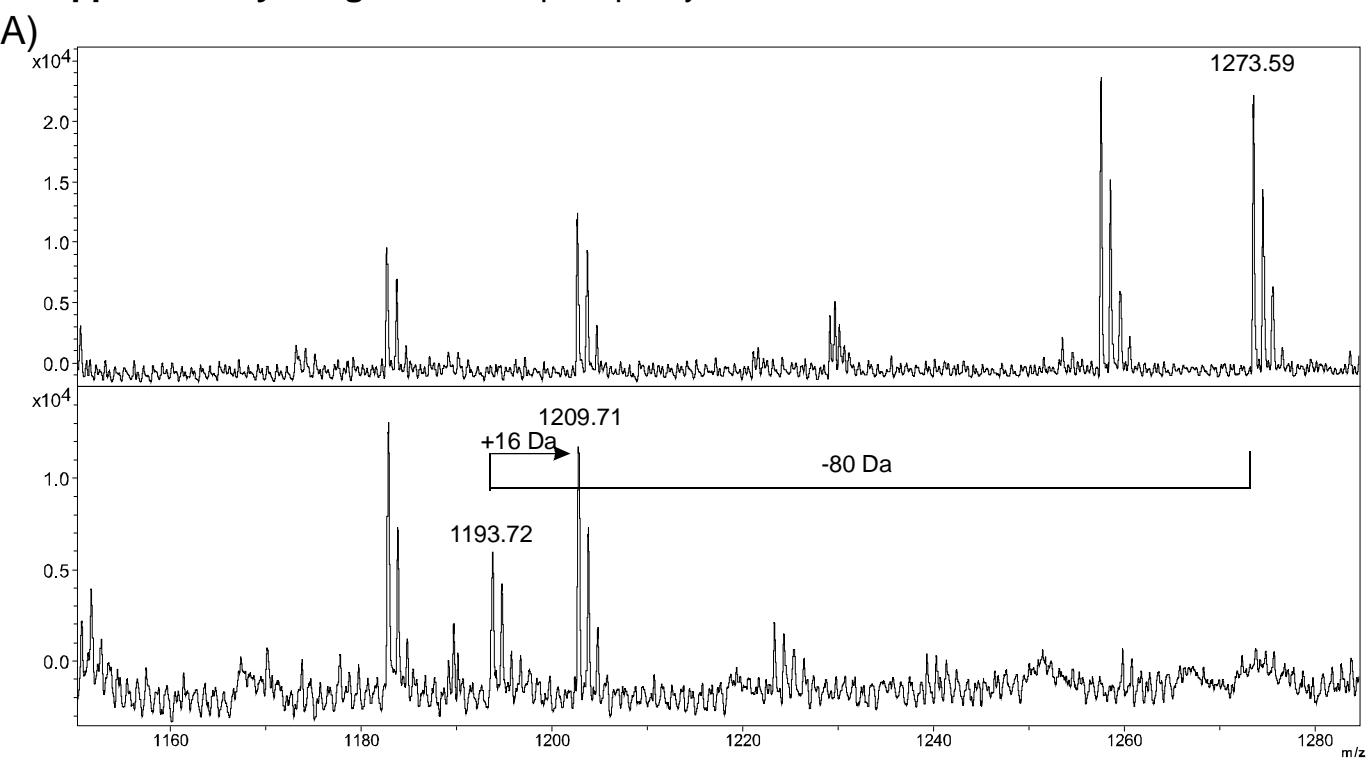

B)

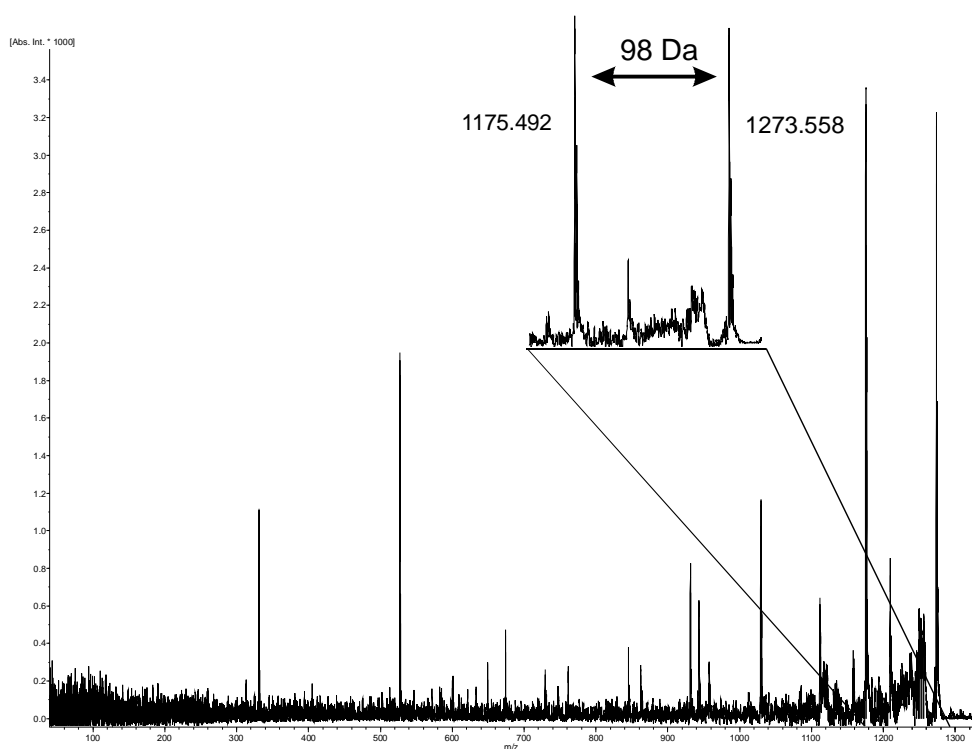

Part A: Mass shift of 80  $m/z$  after the alkaline phosphatase treatment.  
Part B: MS/MS spectrum and indication of neutral loss.

A)

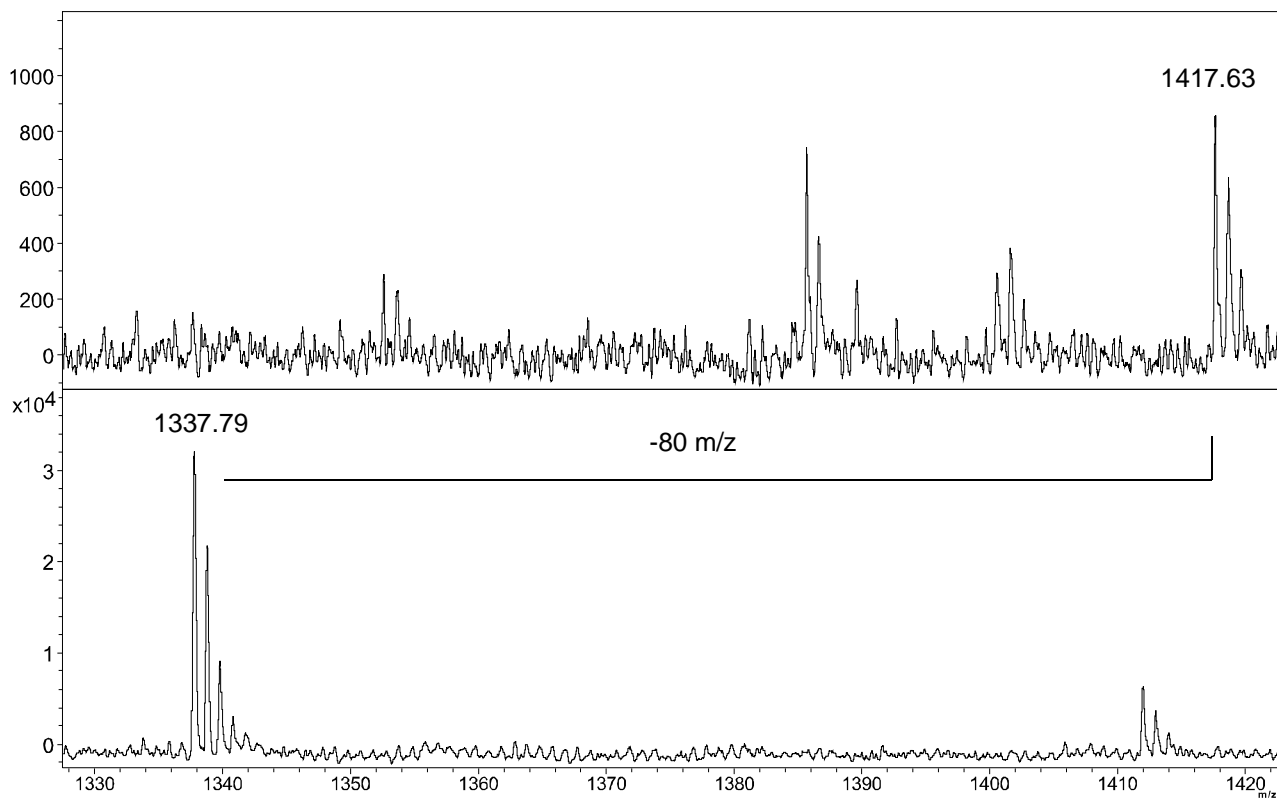

B)

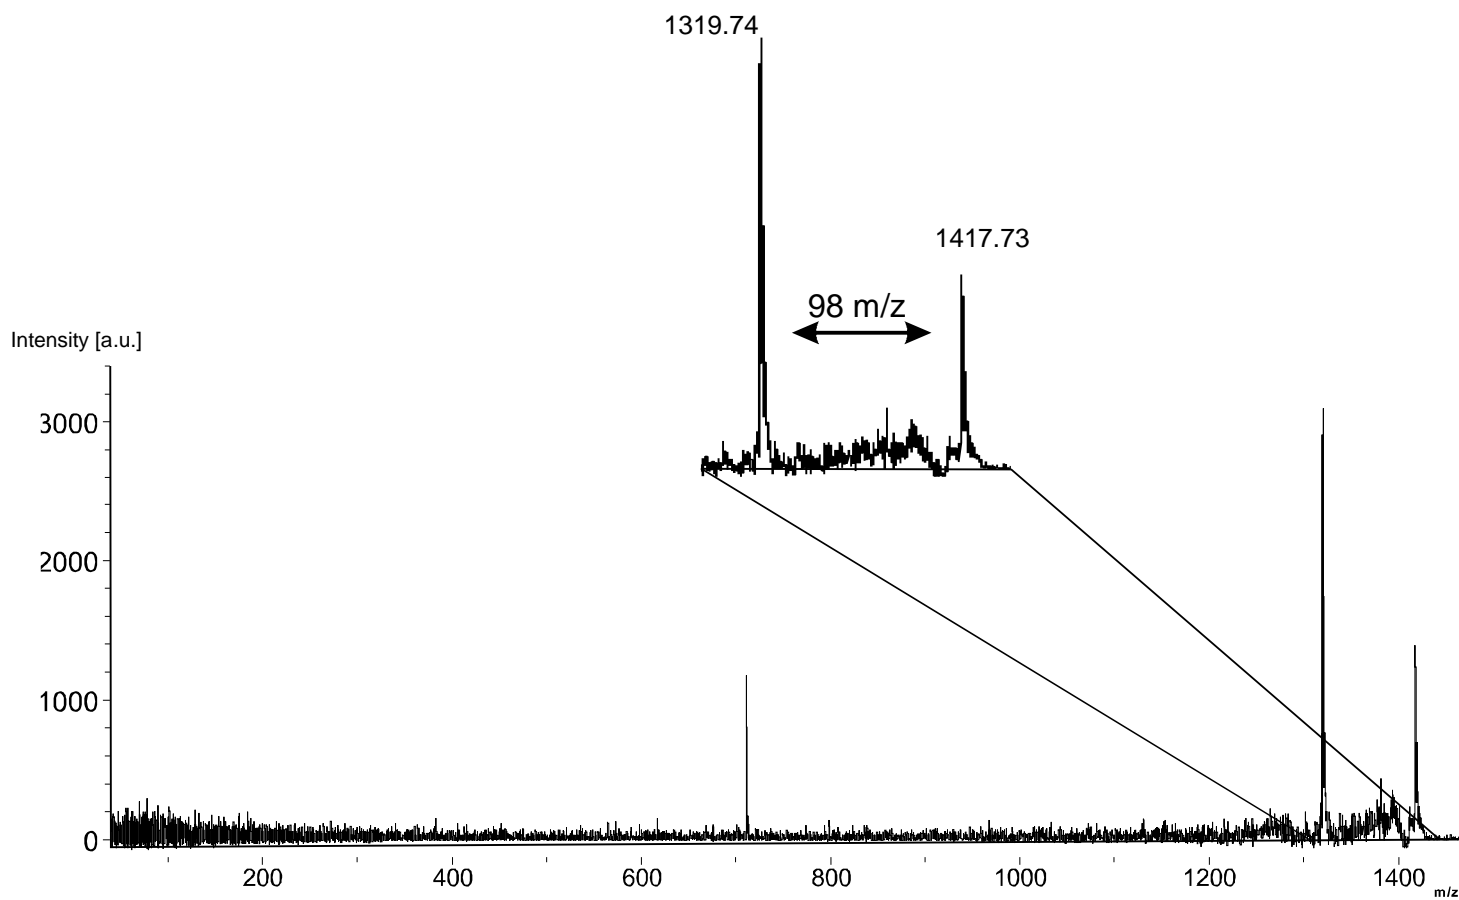

Part A: Mass shift of  $80\text{ m/z}$  after the alkaline phosphatase treatment.  
Part B: MS/MS spectrum and indication of neutral loss.

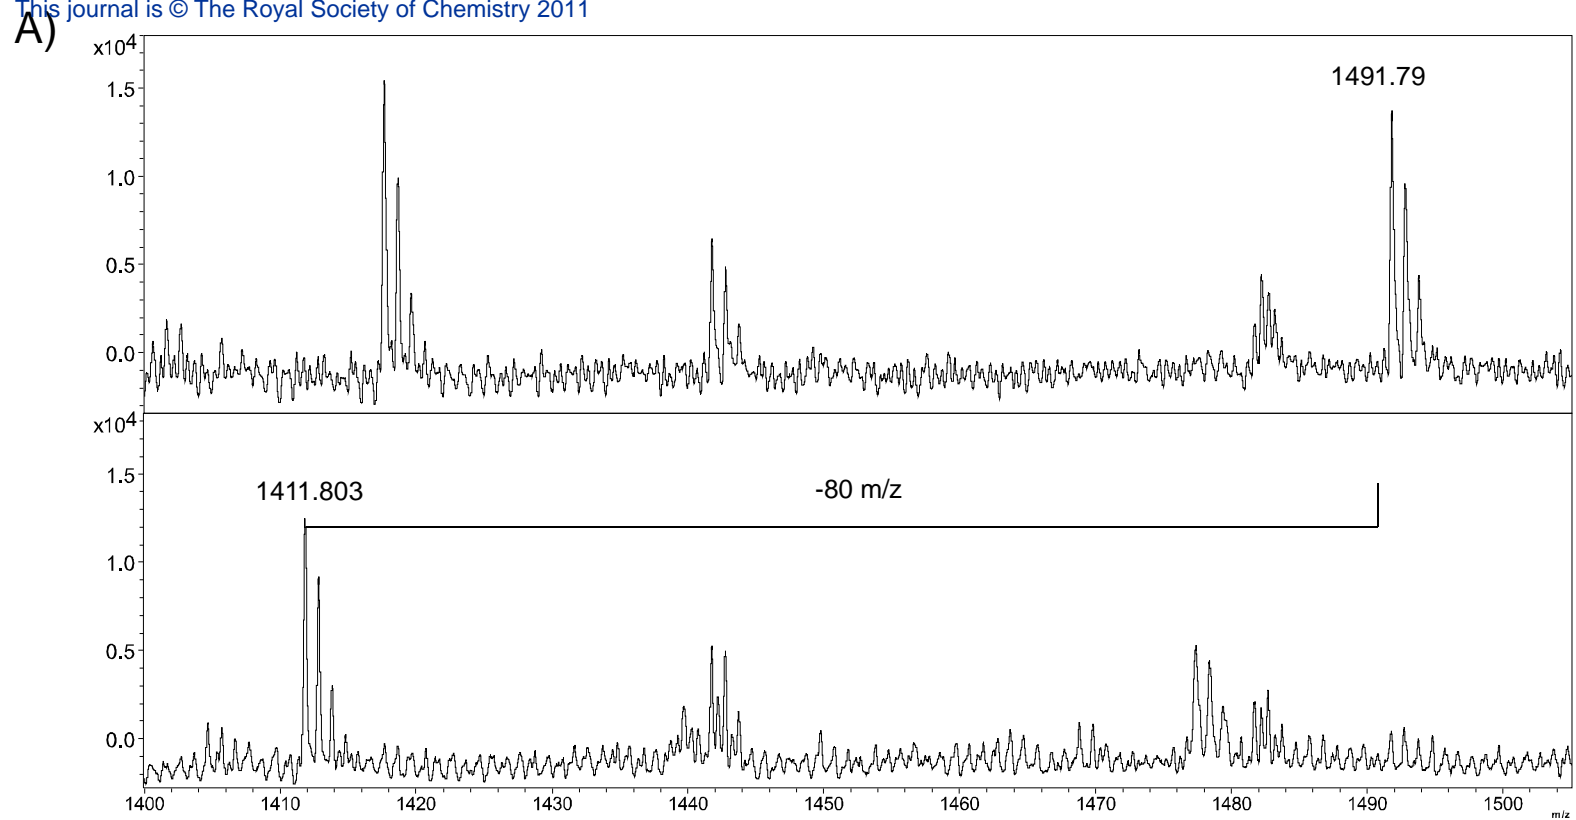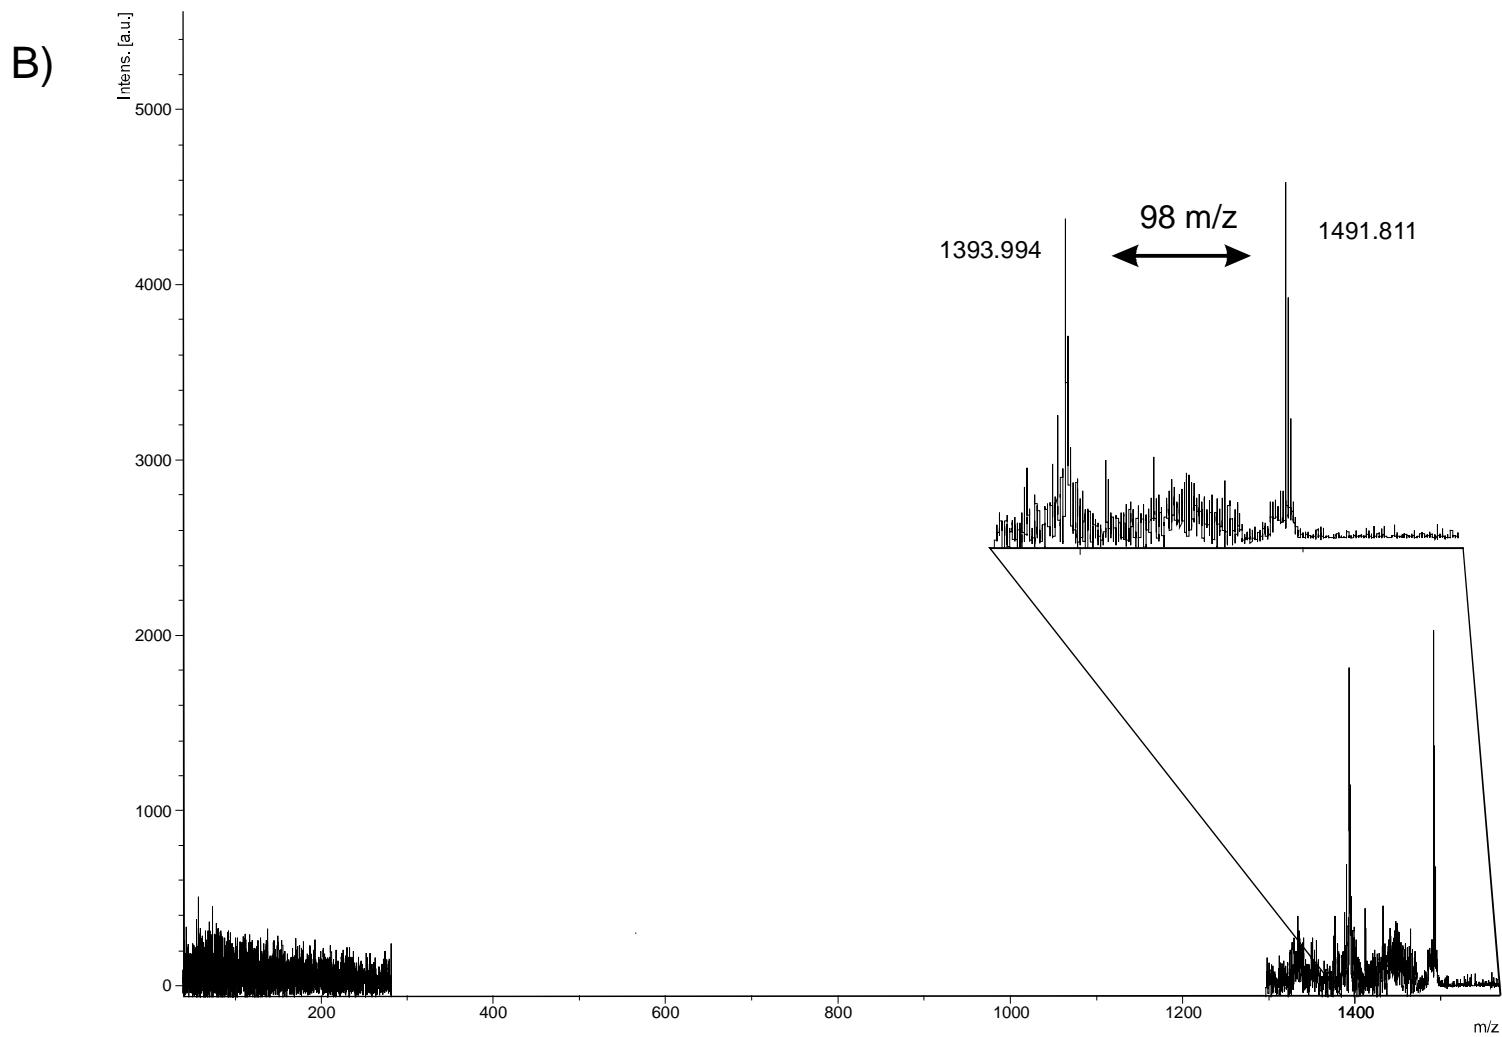

Part A: Mass shift of  $80\text{ m/z}$  after the alkaline phosphatase treatment.  
Part B: MS/MS spectrum and indication of neutral loss.

A)

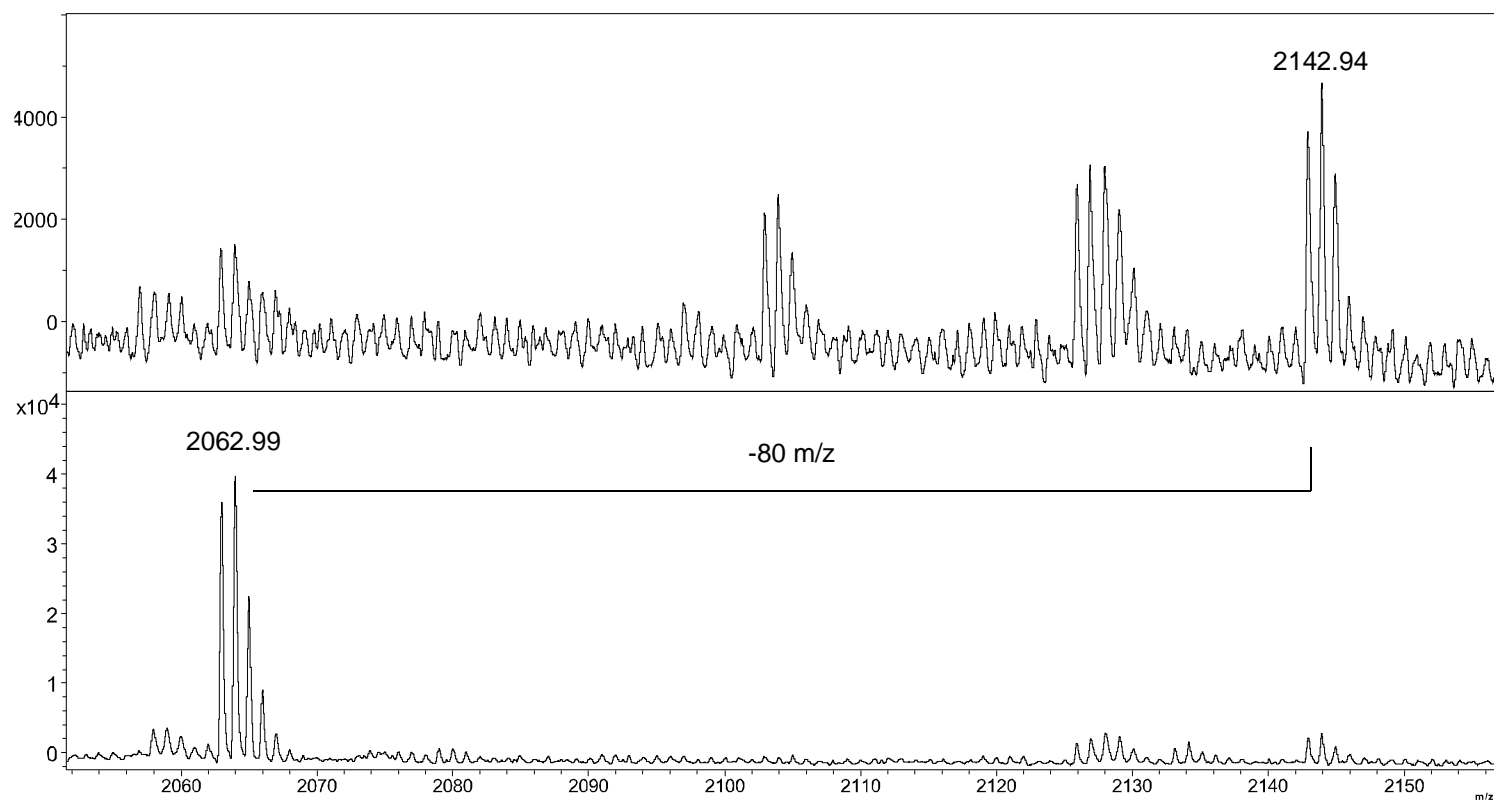

B)

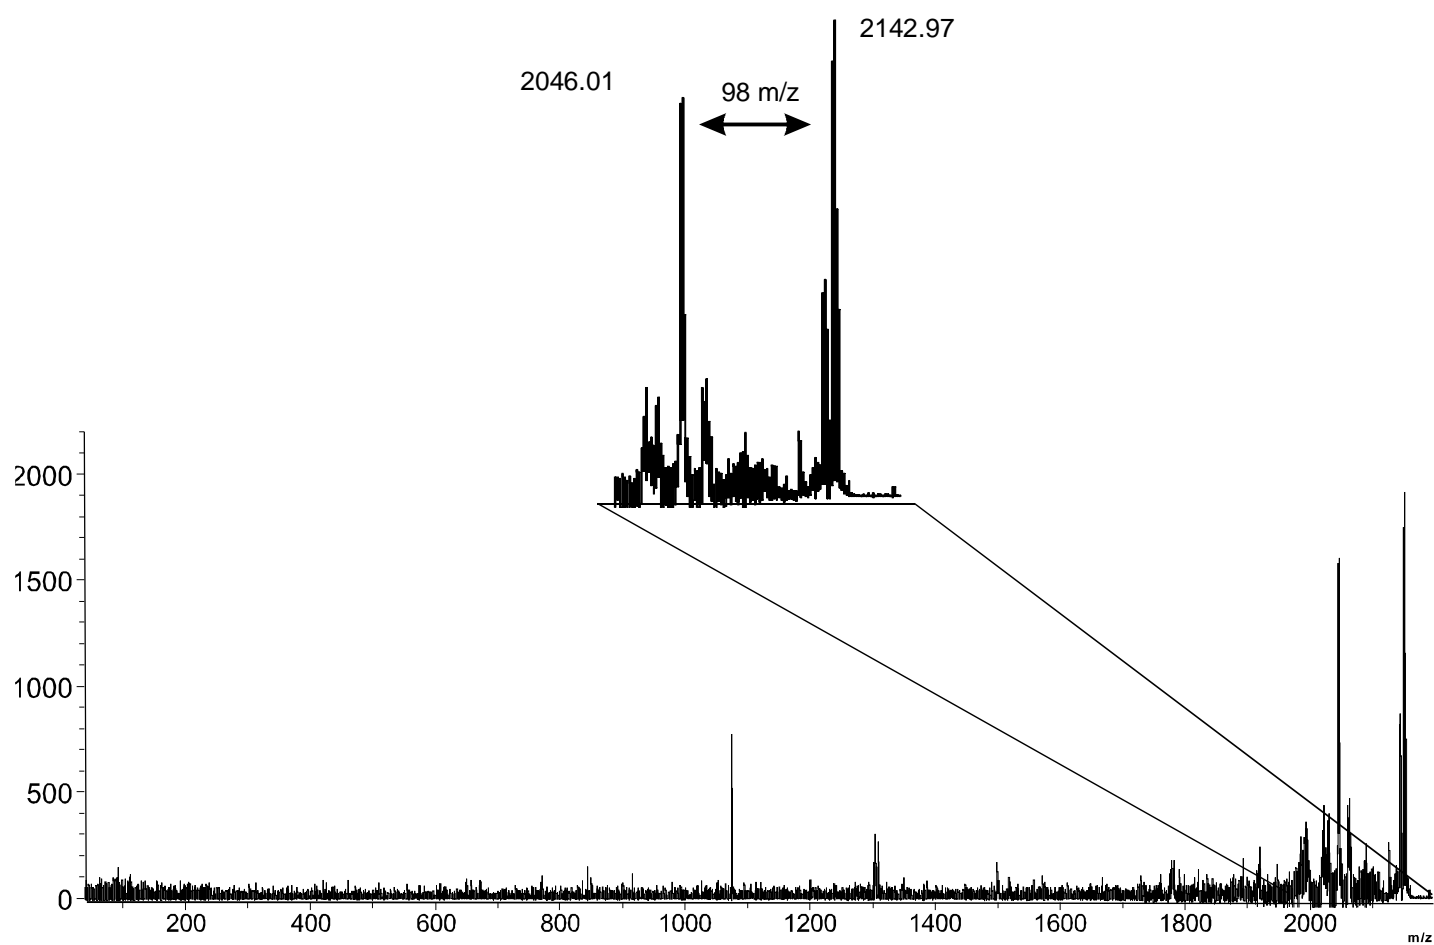

Part A: Mass shift of 80 m/z after the alkaline phosphatase treatment.  
Part B: MS/MS spectrum and indication of neutral loss.

A)

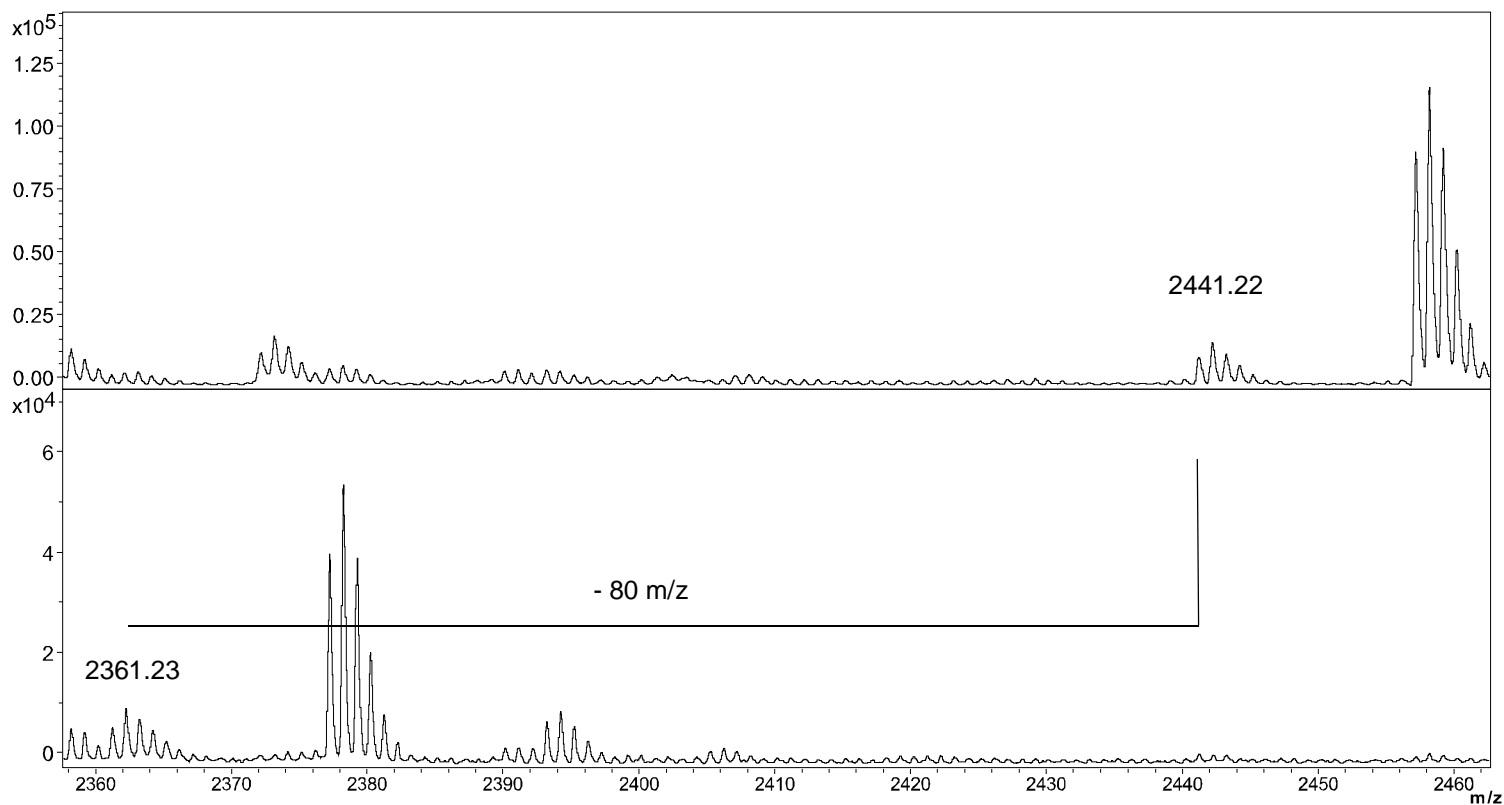

B)

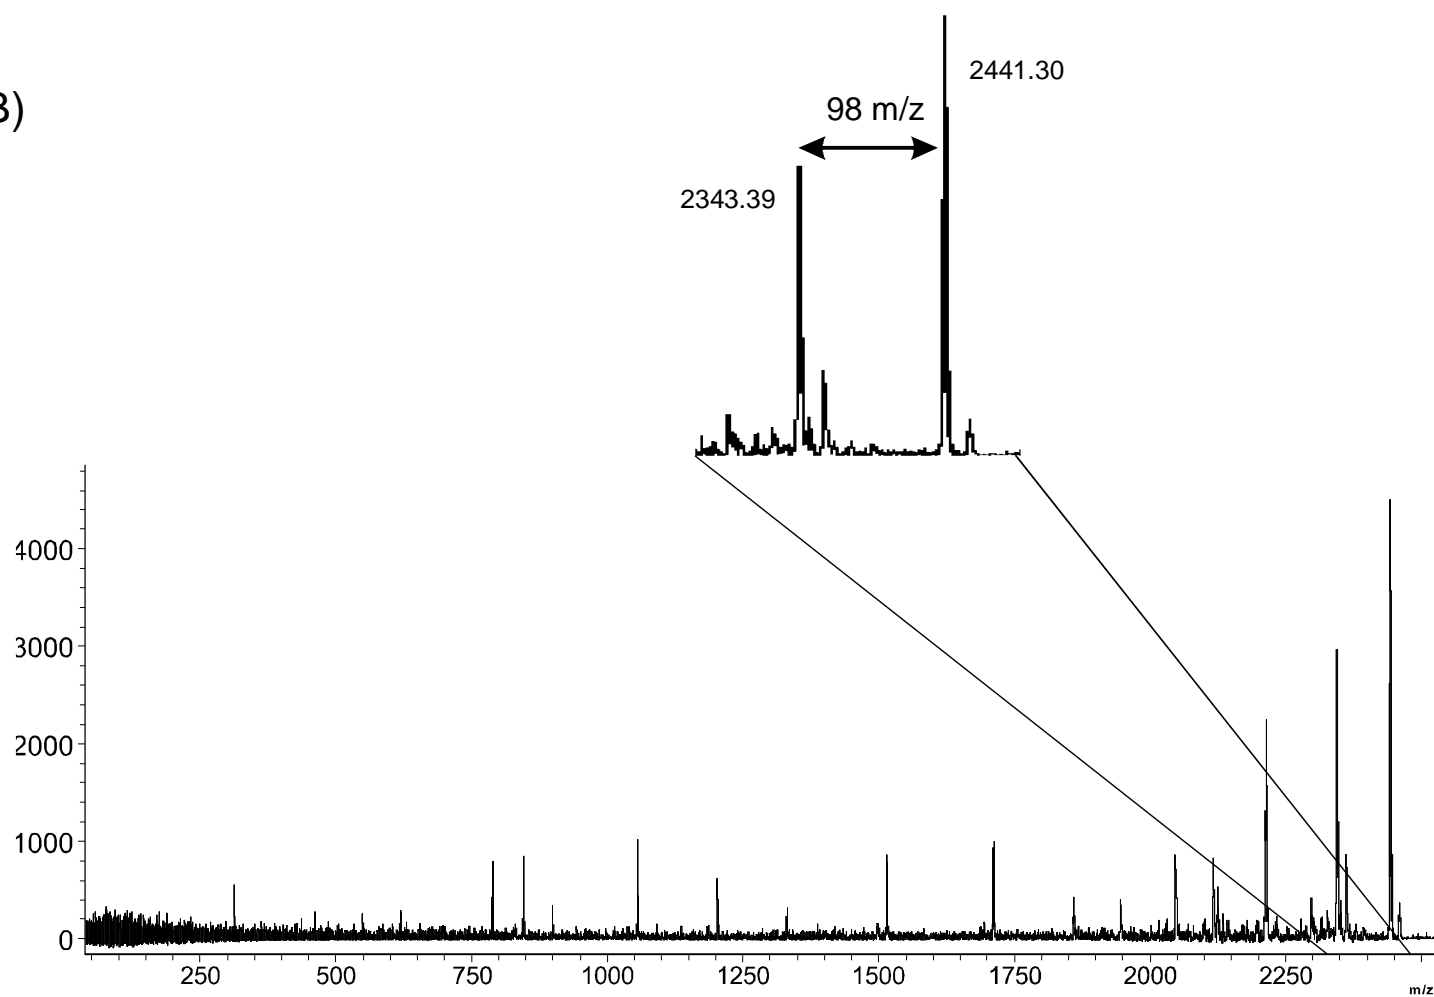

Part A: Mass shift of 80 m/z after the alkaline phosphatase treatment.  
Part B: MS/MS spectrum and indication of neutral loss.

A)

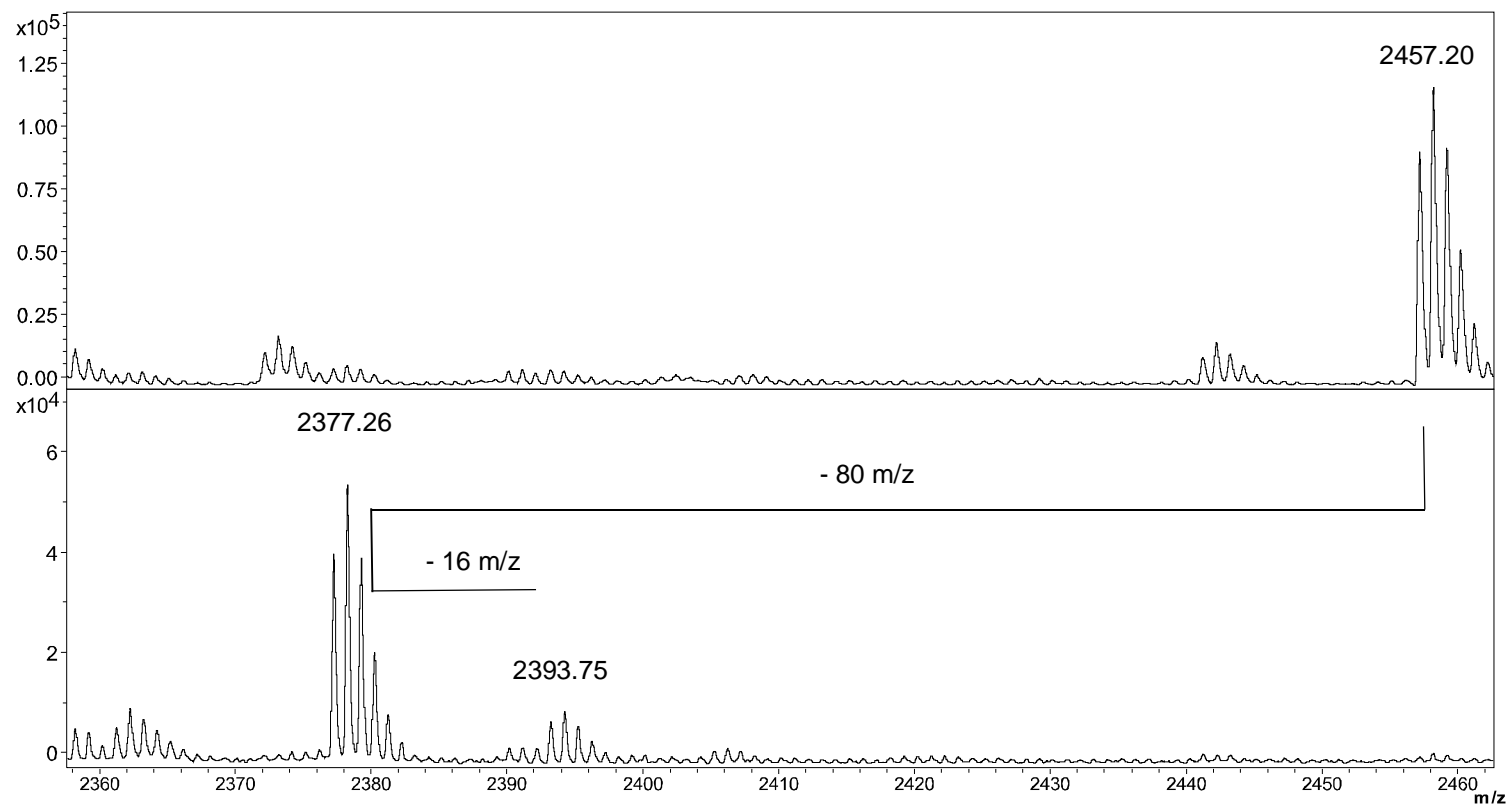

B)

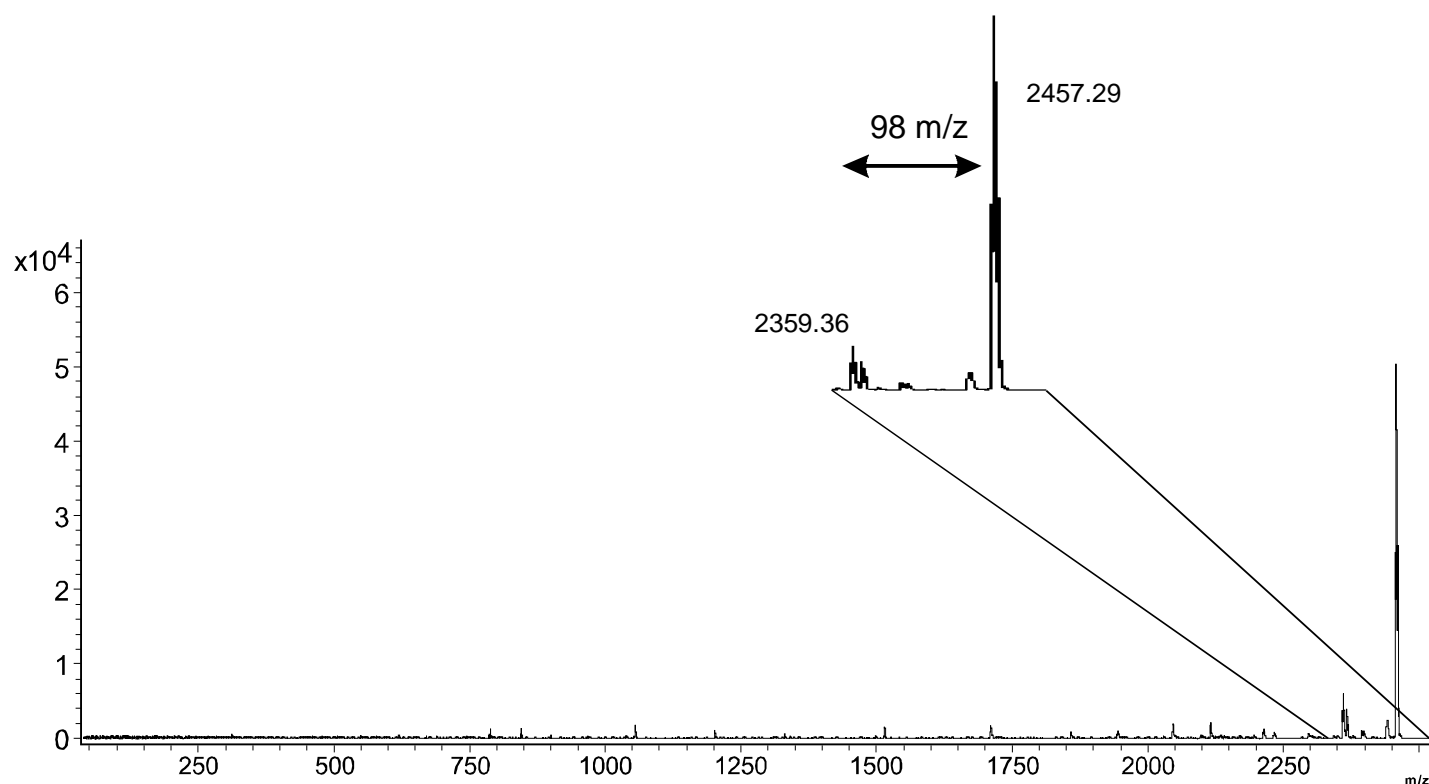

Part A: Mass shift of 80  $m/z$  after the alkaline phosphatase treatment.  
Part B: MS/MS spectrum and indication of neutral loss.

A)

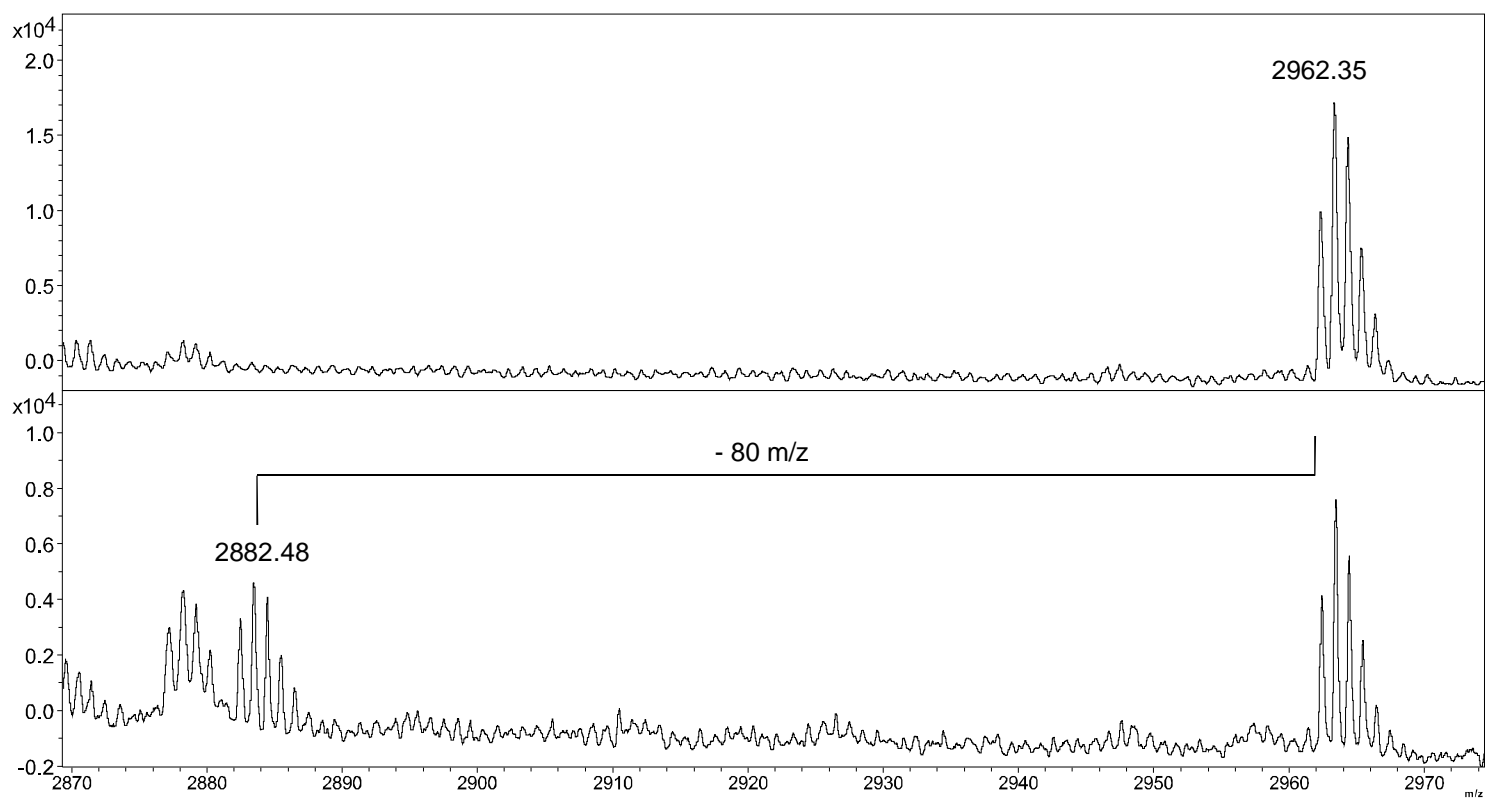

B)

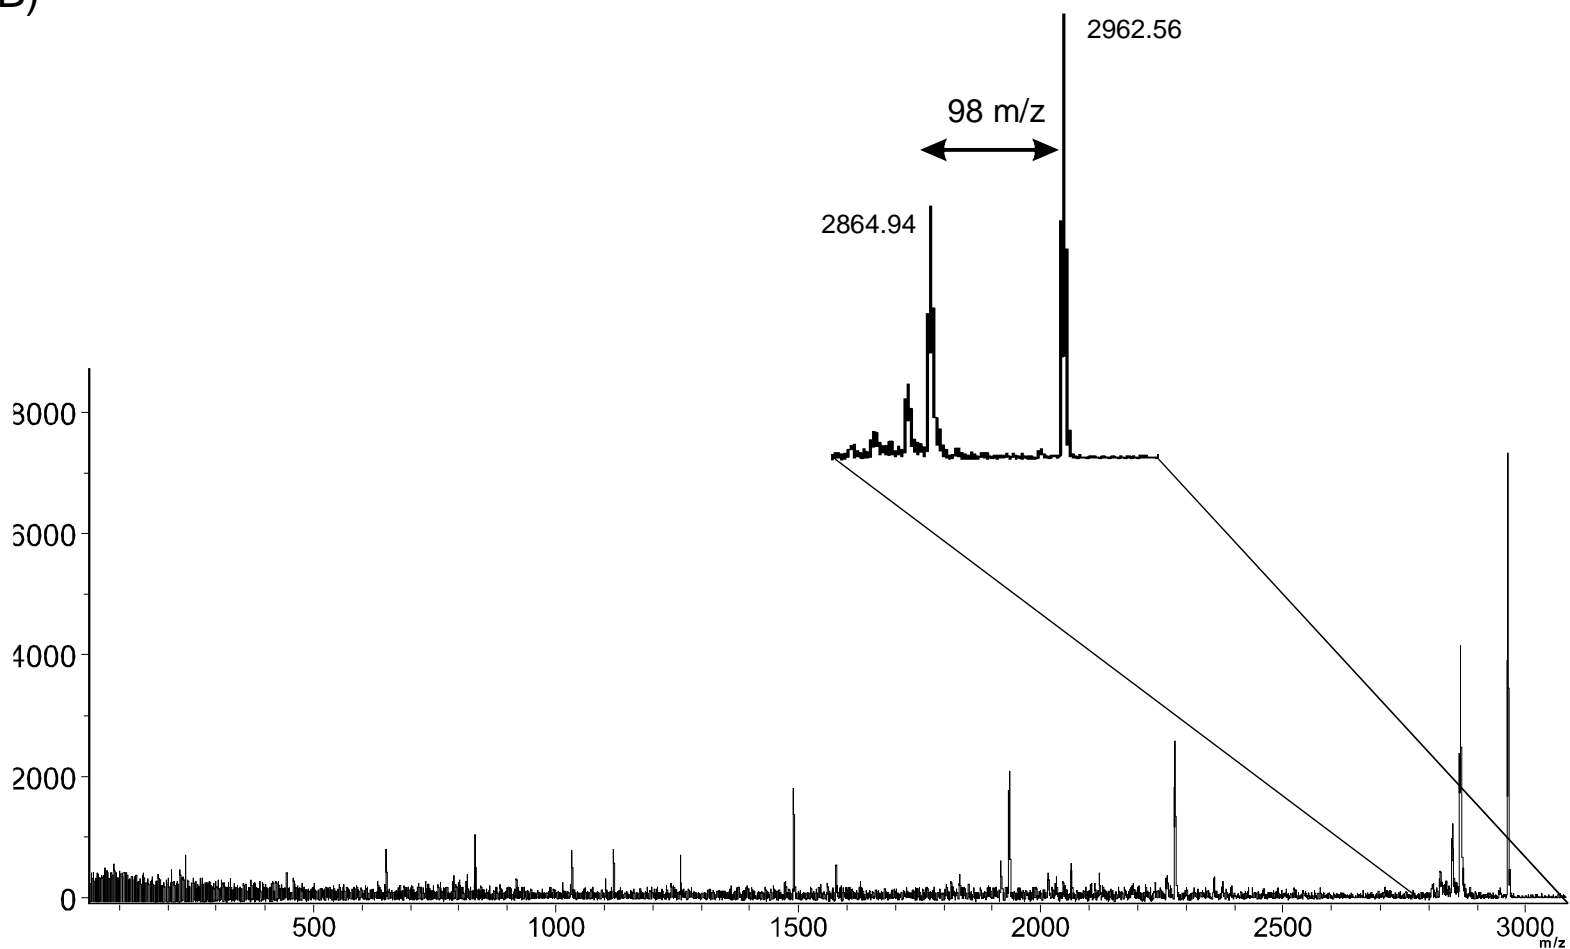

Part A: Mass shift of  $80\text{ m/z}$  after the alkaline phosphatase treatment.

Part B: MS/MS spectrum and indication of neutral loss.



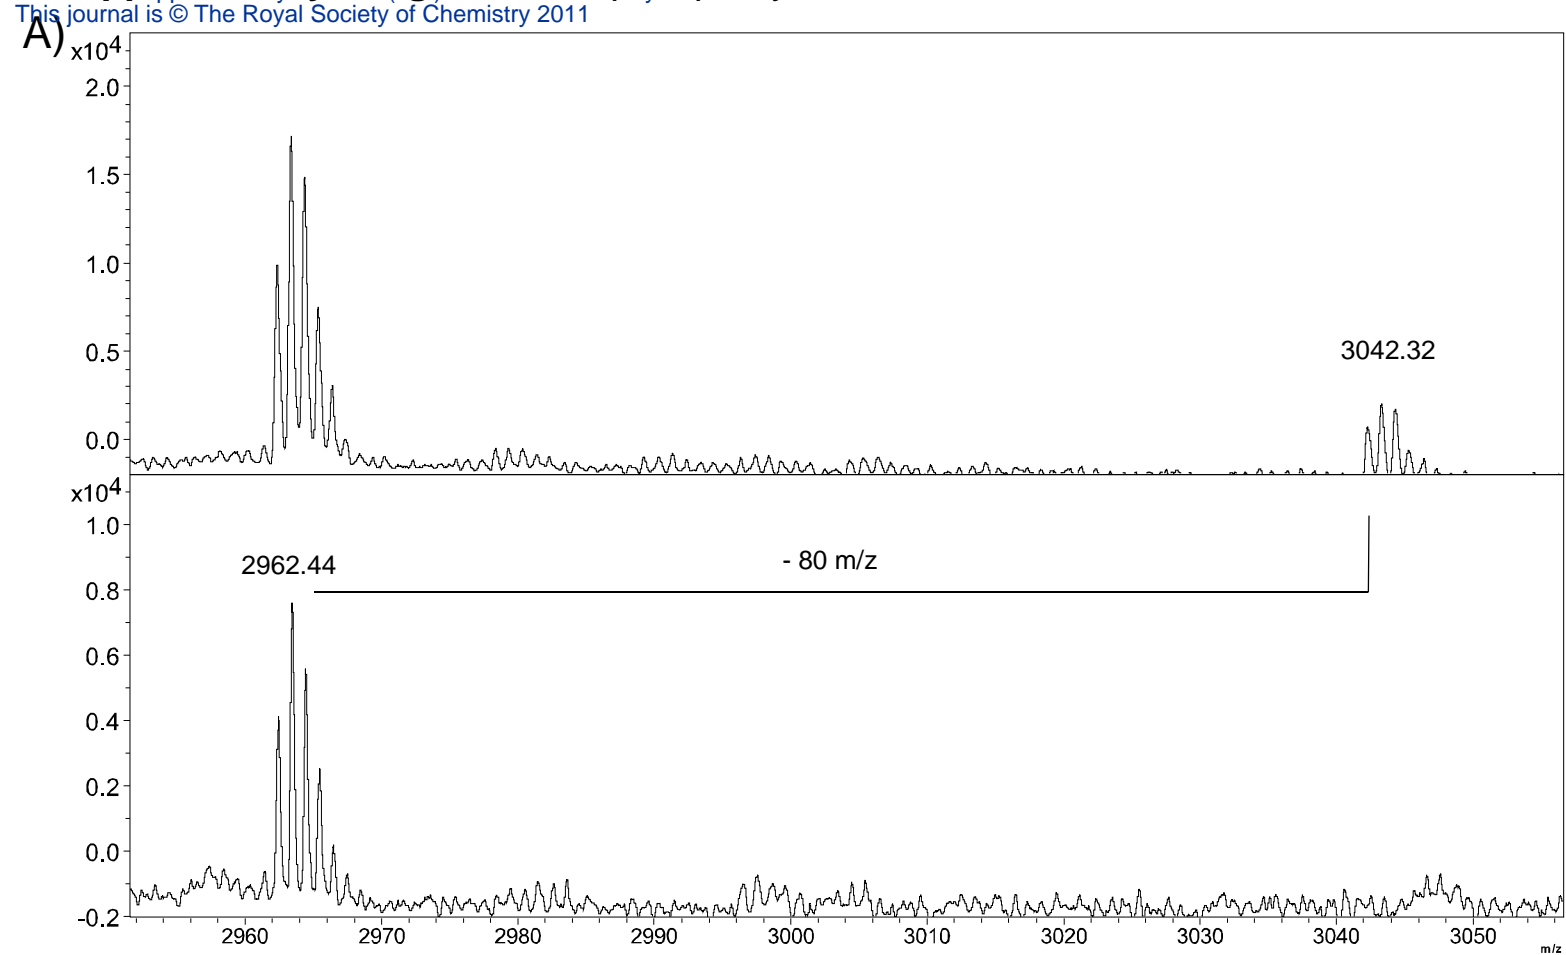

B)

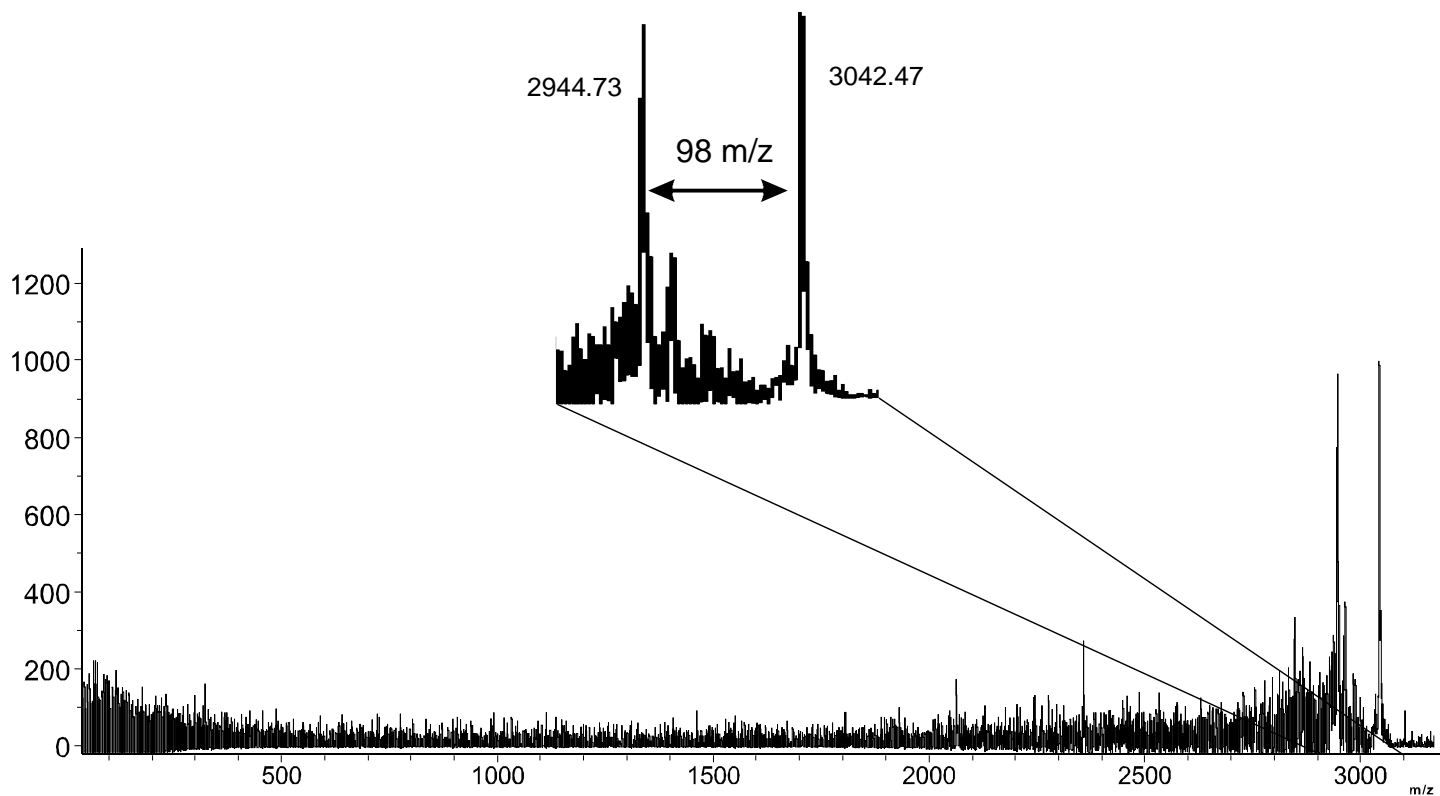

Part A: Mass shift of  $80\text{ m/z}$  after the alkaline phosphatase treatment.  
Part B: MS/MS spectrum and indication of neutral loss.

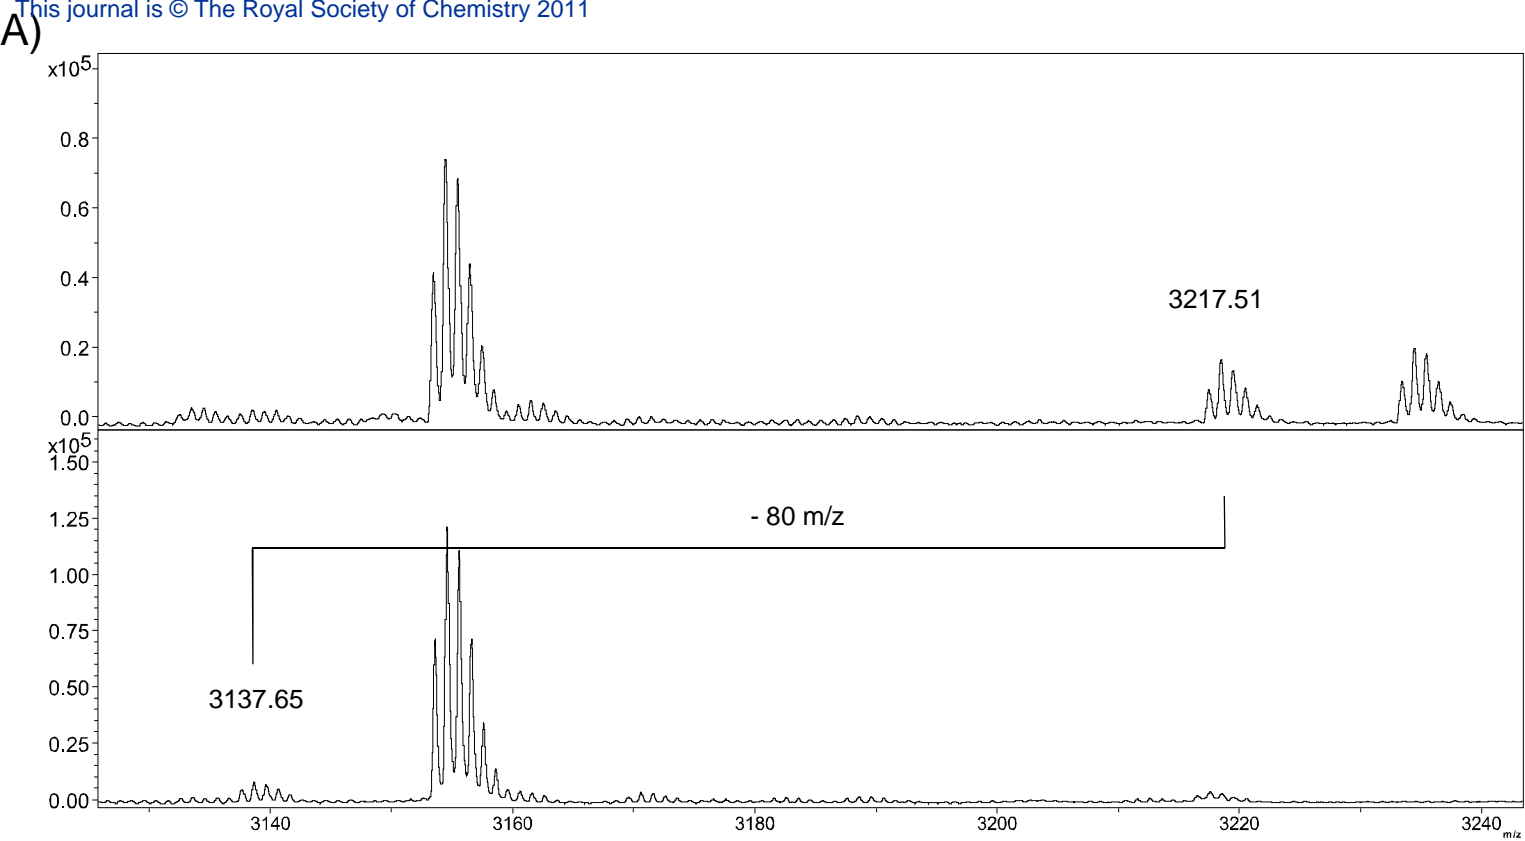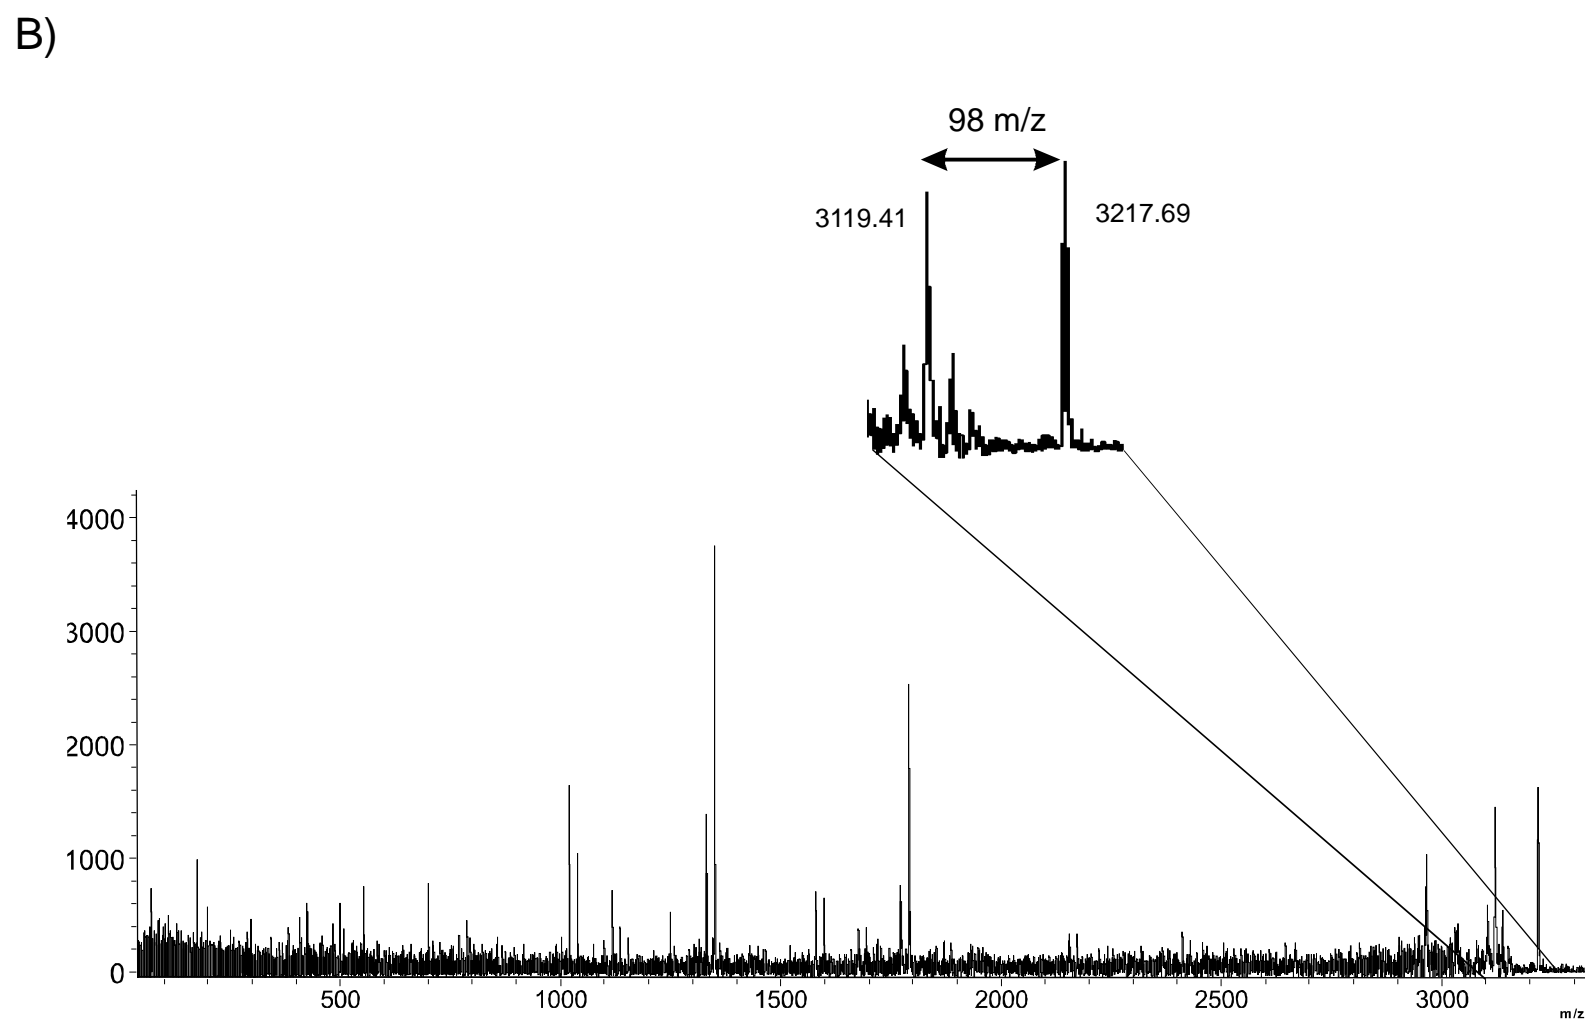

Part A: Mass shift of  $80\text{ m/z}$  after the alkaline phosphatase treatment.  
Part B: MS/MS spectrum and indication of neutral loss.

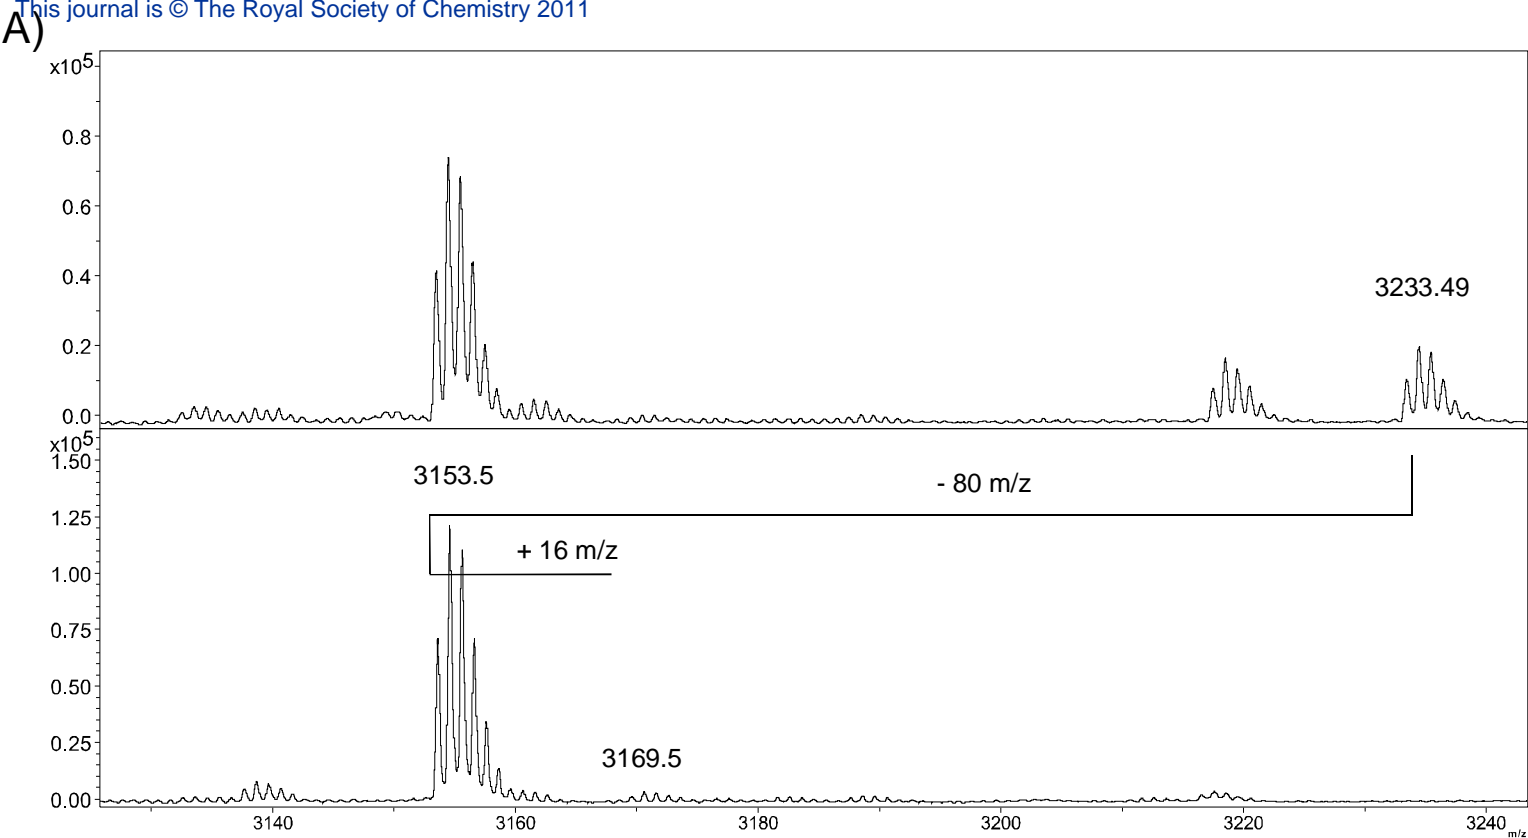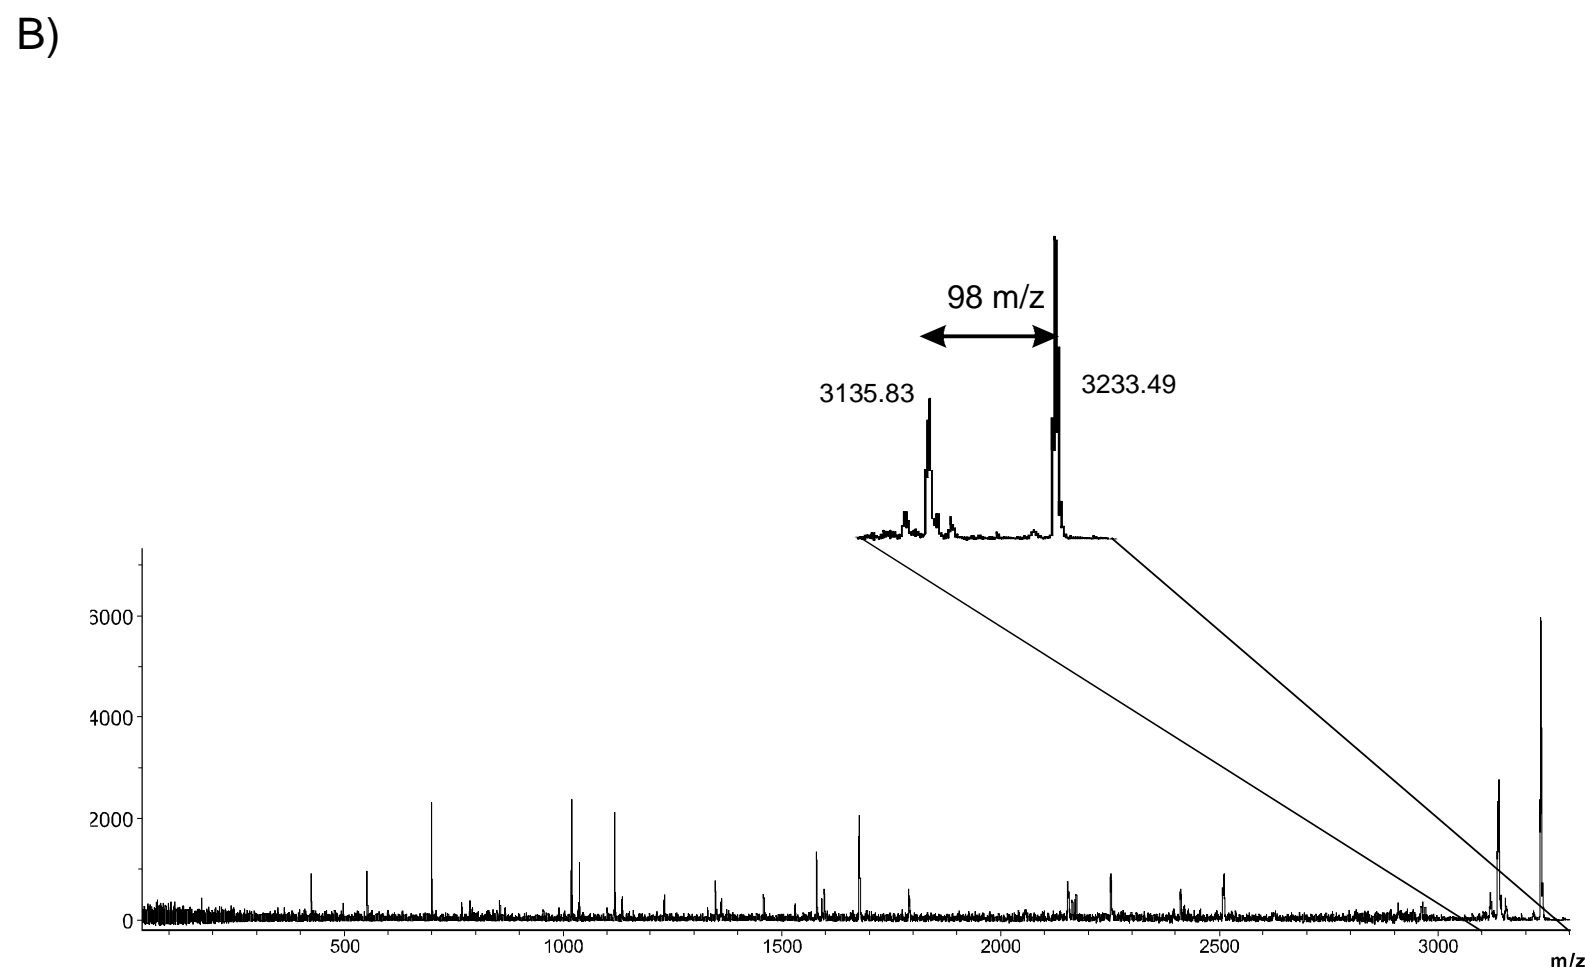

Part A: Mass shift of  $80 m/z$  after the alkaline phosphatase treatment.  
Part B: MS/MS spectrum and indication of neutral loss.

A)

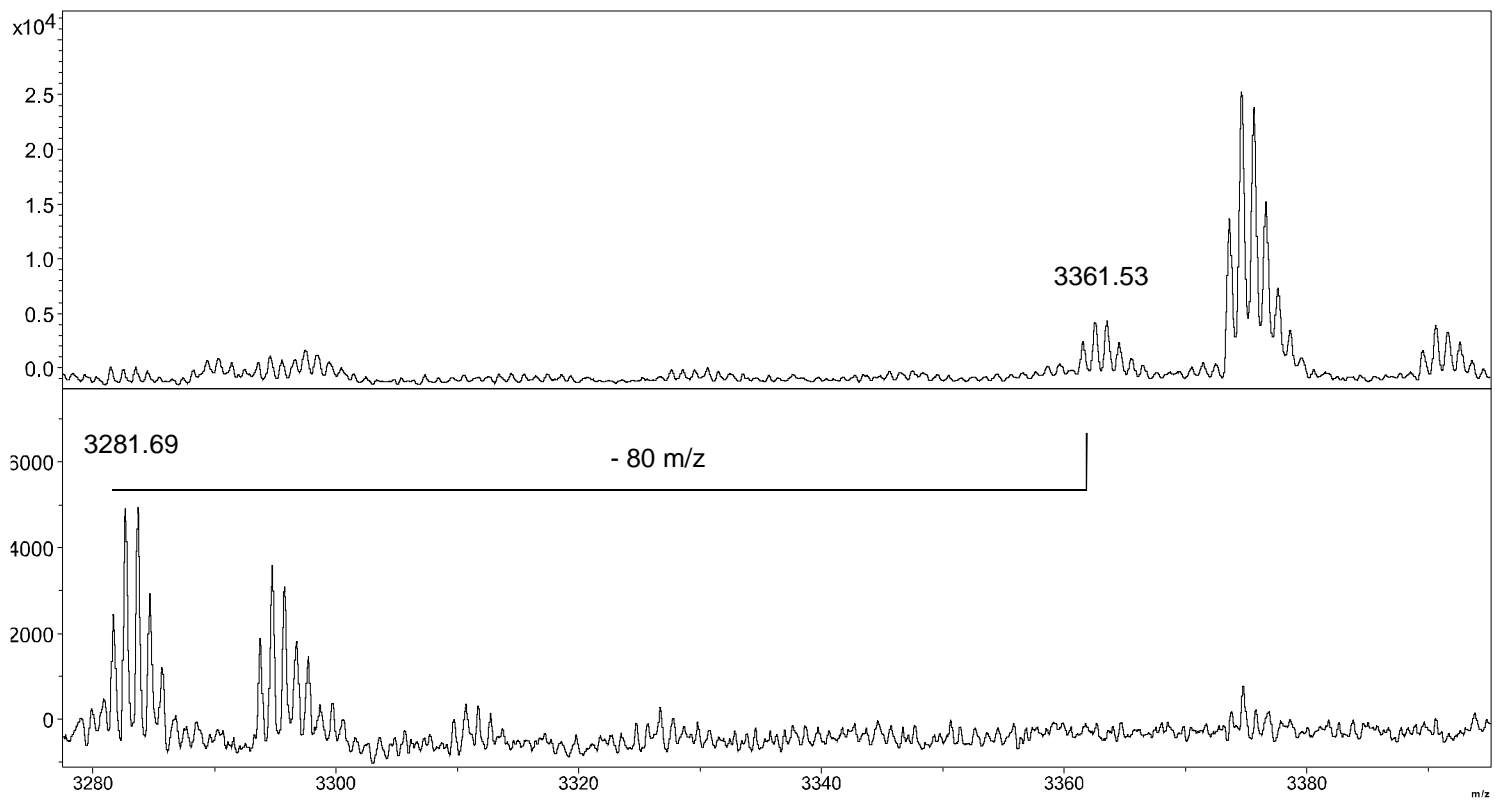

Part A: Mass shift of 80 m/z after the alkaline phosphatase treatment.

A)

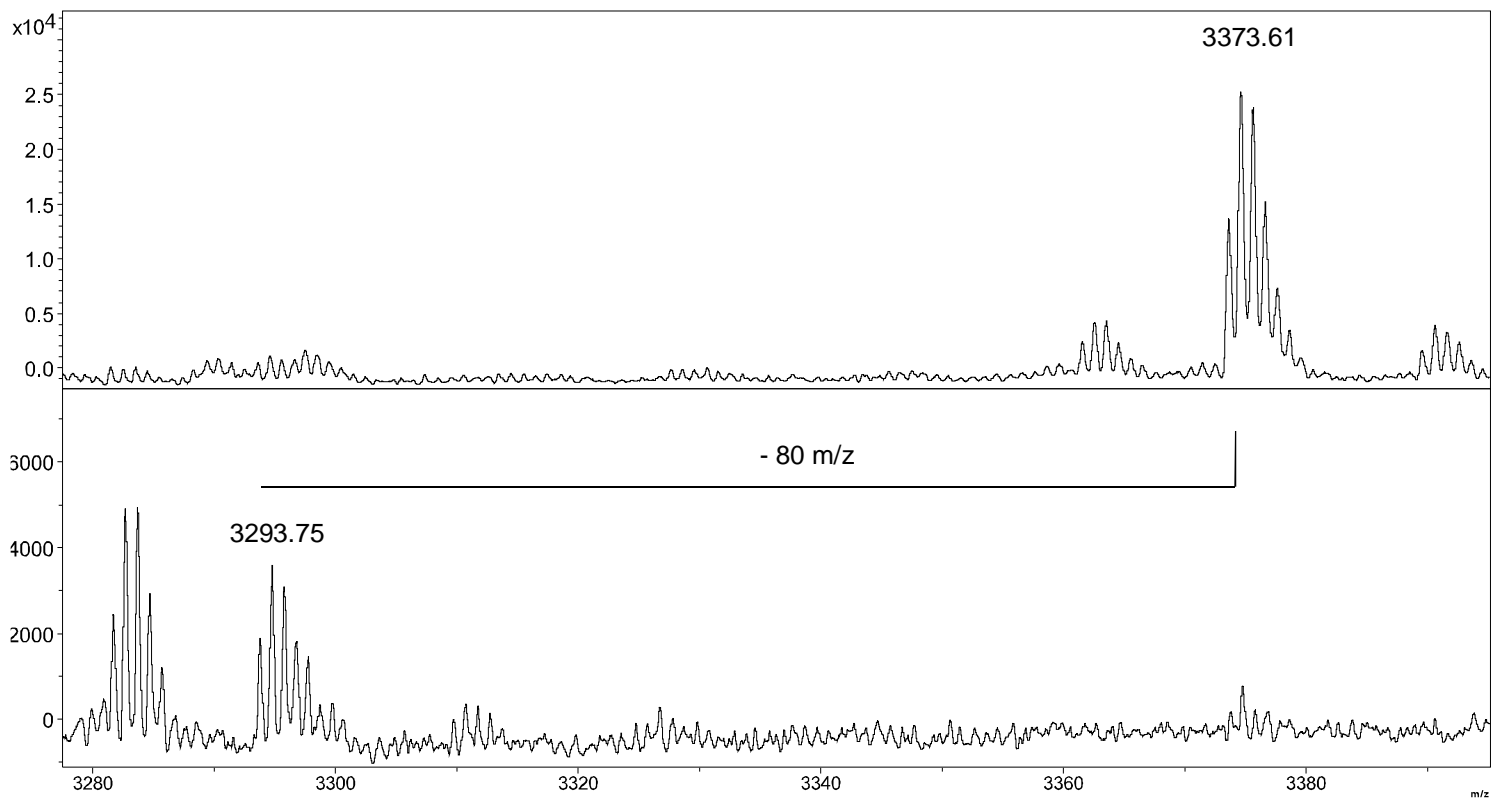

B)

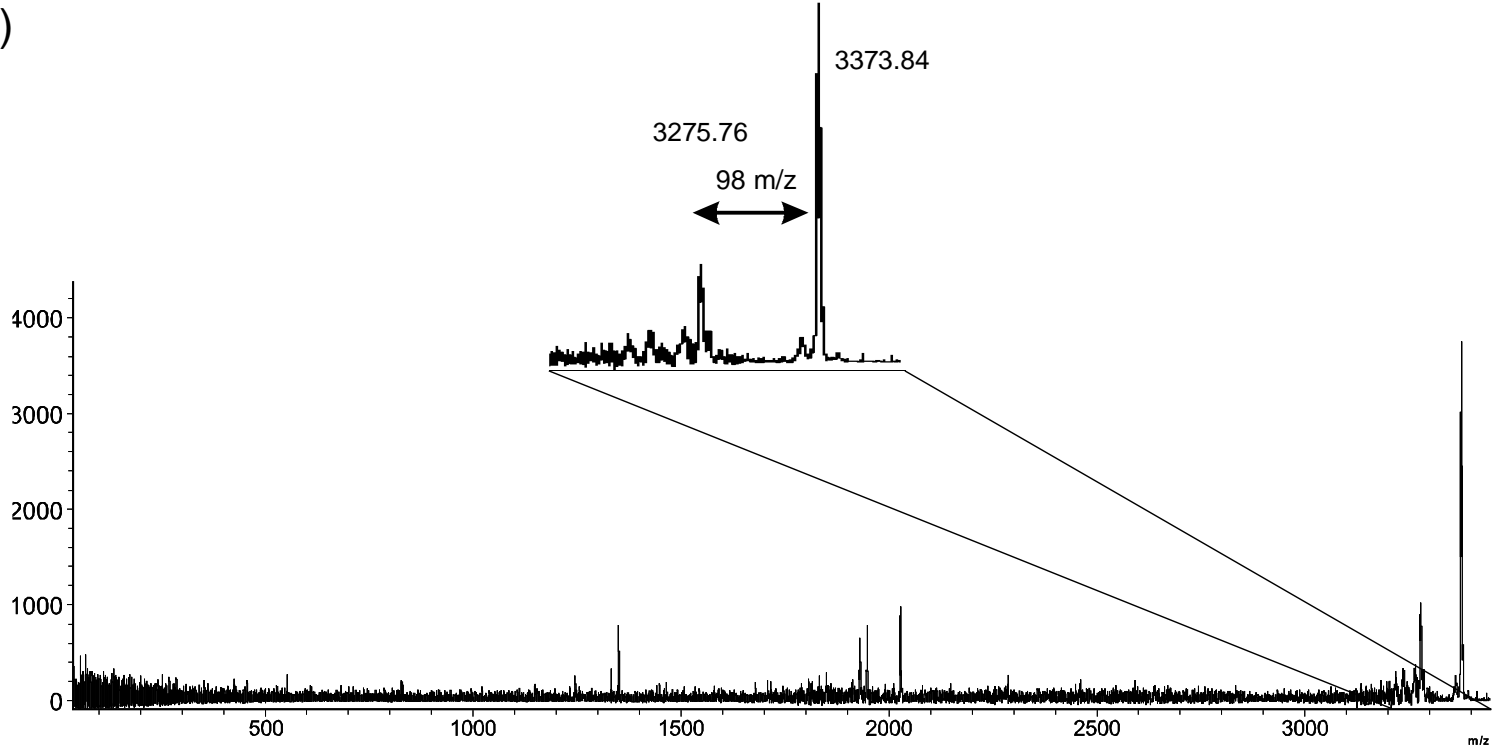

Part A: Mass shift of 80 m/z after the alkaline phosphatase treatment.  
Part B: MS/MS spectrum and indication of neutral loss.

**Supplementary table 1.** Annotated peaks for PKA phosphorylated NFATc1

| N:o | m/z     | start | Sequence                                               | end | Modifications (Mascot)                   | Mascot score | *)   |
|-----|---------|-------|--------------------------------------------------------|-----|------------------------------------------|--------------|------|
| 1   | 1257.55 | 1     | MPp(S)TSFPVPSK                                         | 11  | phos@3                                   | 77           | 1.1  |
| 1*  | 1273.54 | 1     | ox(M)Pp(S)TSFPVPSK                                     | 11  | Ox@1, phos@3                             | 42           | 1.2  |
| 2   | 1385.61 | 244   | Ap(S)VETEESWLGAR                                       | 255 | phos@245                                 | 106          | 1.3  |
| 2*  | 1417.59 | 244   | Ap(S)VETEESox(W)LGAR                                   | 255 | phos@245, Ox@252                         | 79           | 1.4  |
| 3   | 1491.78 | 337   | Kp(TT)LEQPPSVALK                                       | 349 | phos@338 or 339                          | 24<br>24     | 1.5  |
| 4   | 1772.82 | 151   | SPp(S)TATLSLPSLEAYR                                    | 166 | phos@153                                 | 109          | 1.6  |
| 5   | 1928.93 | 150   | RSPp(S)TATLSLPSLEAYR                                   | 166 | phos@153                                 | 61           | 1.7  |
| 6   | 2441.19 | 1     | MPp(S)TSFPVPSKFPLGPAAAVFGR                             | 23  | phos@3                                   | 53           | 1.8  |
| 6*  | 2457.22 | 1     | ox(M)Pp(S)TSFPVPSKFPLGPAAAVFGR                         | 23  | Ox@1, phos@3                             | 51           | 1.9  |
| 7   | 3217.62 | 151   | p(S)Pp(ST)Ap(T)Lp(S)Lp(S)LEAYRDPS<br>carb(C)LSPASSLSSR | 180 | phos@151,154,156,158<br>or 161; carb@169 | 10 to 15     | 1.10 |
| 8   | 3373.86 |       | unknown                                                |     | 1 x phos                                 |              | 1.11 |

NFATc1 was phosphorylated with PKA and four different phosphorylation sites were detected (amino acids 3, 153, 245 and 338 or 339) in nine different peptides (peptides 1, 1\*, 2, 2\*, 3, 4, 5, 6 and 6\*). Serine phosphorylation at site three was detected in four different peptides (peptides 1, 1\*, 6, 6\*) due to methionine oxidation (peptides 1\* and 6\*) and missed cleavage (peptides 6 and 6\*). Phosphorylation at S-153 was detected two times due to missed cleavage (peptides 4 and 5). Serine 245 was detected to be phosphorylated in peptide 2 and its doubly oxidized form (peptide 2\*). Peptide number 3 was singly phosphorylated from sites T-338 or T-339. No reliable phosphorylation site determination could be done for peptides 7 and 8. Phos = phosphorylation, carb = carbamidomethylation, Ox = oxidation, \*) = supplementary image number.

## Supplementary table 2

Pim-1 phosphorylated peptides used in method optimization (figure 2)

| <b>m/z</b>     | <b>neutral loss in MS/MS</b> | <b>Mass shift after alkaline phosphatase treatment</b> | <b>*)</b> |
|----------------|------------------------------|--------------------------------------------------------|-----------|
| <b>1257.56</b> | -98 m/z                      | -80 m/z                                                | S1        |
| <b>1273.55</b> | -98 m/z                      | -80 + 16 m/z                                           | S1*       |
| <b>1385.61</b> | -98 m/z                      | -80 m/z                                                | 1.3       |
| <b>1417.63</b> | -98 m/z                      | -80 m/z                                                | S2*       |
| <b>1491.77</b> | -98 m/z                      | -80 m/z                                                | S3        |
| <b>2142.95</b> | -98 m/z                      | -80 m/z                                                | S4        |
| <b>2441.21</b> | -98 m/z                      | -80 m/z                                                | S5        |
| <b>2457.20</b> | -98 m/z                      | -80 + 16 m/z                                           | S5*       |
| <b>2962.60</b> | -98 m/z                      | -80 m/z                                                | S6        |
| <b>3042.32</b> | -98 m/z                      | -80 m/z                                                | S7        |
| <b>3217.51</b> | -98 m/z                      | -80 m/z                                                | S8        |
| <b>3233.45</b> | -98 m/z                      | -80 m/z                                                | S8*       |
| <b>3361.68</b> | -98 m/z                      | -80 m/z                                                | S9        |
| <b>3373.58</b> | -98 m/z                      | -80 m/z                                                | S10       |

Supplementary Table 3. Observed phosphopeptides derived from 500 fmol of  $\alpha$ - and  $\beta$ -caseins

| Number | Peptide sequence          | Protein<br>(Swiss-Prot) <sup>a</sup> | Sequence<br>Start-End | Number of<br>phosphoryl groups | [M+H] <sup>+</sup><br>( <i>m/z</i> ) <sup>b</sup> | Observed phosphopeptides<br>with TiO <sub>2</sub> coated glass slide <sup>c</sup> | Observed phosphopeptides<br>with ITO coated glass slide <sup>d</sup> |
|--------|---------------------------|--------------------------------------|-----------------------|--------------------------------|---------------------------------------------------|-----------------------------------------------------------------------------------|----------------------------------------------------------------------|
| 1      | EQLSTSEENSK               | CASA2_BOVIN                          | 141-151               | 2                              | 1411.5                                            | x                                                                                 |                                                                      |
| 2      | TVDMESTEVEFTK             | CAS2_BOVIN                           | 153-164               | 1                              | 1466.61                                           | x                                                                                 | x                                                                    |
| 2*     | (Oxidized)                |                                      |                       |                                | 1482.61                                           | x                                                                                 | x                                                                    |
| 3      | TVDMESTEVEFTKK            | CAS2_BOVIN                           | 153-165               | 1                              | 1594.71                                           | x                                                                                 | x                                                                    |
| 3*     | (Oxidized)                |                                      |                       |                                | 1610.70                                           | x                                                                                 | x                                                                    |
| 4      | VPQLEIVPNSAEER            | CAS1_BOVIN                           | 121-134               | 1                              | 1660.79                                           | x                                                                                 | x                                                                    |
| 5      | YLGEYLIVPNSAEER           | CAS1_BOVIN                           |                       | 1                              | 1832.85                                           | x                                                                                 | x                                                                    |
| 6      | DIGSESTEDQAMEDIK          | CAS1_BOVIN                           | 58-73                 | 2                              | 1927.69                                           | x                                                                                 | x                                                                    |
| 6*     | (Oxidized)                |                                      |                       |                                | 1943.69                                           | x                                                                                 | x                                                                    |
| 7      | YKVPQLEIVPNSAEER          | CAS1_BOVIN                           | 119-134               | 1                              | 1951.95                                           | x                                                                                 | x                                                                    |
| 8      | FQSEEQQTDELQDK            | CASB_BOVIN                           | 48-63                 | 1                              | 2061.83                                           | x                                                                                 | x                                                                    |
| 9      | IEKFQSEEQQTDELQDK         | CASB_BOVIN                           | 45-63                 | 1                              | 2432.05                                           | x                                                                                 | x                                                                    |
| 10     | FQSEEQQTDELQDKIHPF        | CASB_BOVIN                           | 48-67                 | 1                              | 2556.09                                           |                                                                                   | x                                                                    |
| 11     | NTMEHVSSSEESIISQETYK      | CAS2_BOVIN                           | 17-36                 | 4                              | 2618.90                                           |                                                                                   | x                                                                    |
| 11*    | (Oxidized)                |                                      |                       |                                | 2634.90                                           |                                                                                   | x                                                                    |
| 12     | VNELSKDIGSESTEDQAMEDIK    | CAS1_BOVIN                           | 52-73                 | 3                              | 2678.02                                           |                                                                                   | x                                                                    |
| 12*    | (Oxidized)                |                                      |                       |                                | 2694.02                                           | x                                                                                 | x                                                                    |
| 13     | QMEAESISSSEIIVPNSVEQK     | CAS1_BOVIN                           | 74-94                 | 5                              | 2720.91                                           | x                                                                                 | x                                                                    |
| 13*    | (Oxidized)                |                                      |                       |                                | 2736.91                                           |                                                                                   | x                                                                    |
| 14     | NTMEHVSSSEESIISQETYKQ     | CAS2_BOVIN                           | 17-37                 | 4                              | 2746.96                                           |                                                                                   | x                                                                    |
| 14*    | (Oxidized)                |                                      |                       |                                | 2762.96                                           | x                                                                                 | x                                                                    |
| 15     | EKVNELSKDIGSESTEDQAMEDIK  | CAS1_BOVIN                           | 50-73                 | 3                              | 2935.16                                           |                                                                                   | x                                                                    |
| 15*    | (Oxidized)                |                                      |                       |                                | 2951.16                                           |                                                                                   | x                                                                    |
| 16     | NANEEYSIGSSSEESAEVATEEVK  | CAS2_BOVIN                           | 61-85                 | 4                              | 3008.03                                           | x                                                                                 | x                                                                    |
| 17     | NANEEYSIGSSSEESAEVATEEVK  | CAS2_BOVIN                           | 61-85                 | 5                              | 3088.00                                           | x                                                                                 | x                                                                    |
| 18     | RELEELNVPGEIVESLSSSEESITR | CASB_BOVIN                           | 16-40                 | 4                              | 3122.27                                           | x                                                                                 | x                                                                    |
| 19     | KNTMEHVSSSEESIISQETYKQEK  | CAS2_BOVIN                           | 16-39                 | 4                              | 3132.20                                           |                                                                                   | x                                                                    |
| 19*    | (Oxidized)                |                                      |                       |                                | 3148.19                                           | x                                                                                 | x                                                                    |

<sup>a</sup>P02662 CAS1\_BOVIN, P02663 CAS2\_BOVIN, P02666 CASB\_BOVIN

<sup>b</sup>Known phosphopeptides detected by MALDI-MS (Stensballe 2004, Larsen 2005).

<sup>c</sup>Phosphopeptides reported in Imanishi *et al.* (2009)

<sup>d</sup>Phosphopeptides reported in this study
